# Supplementary material for: Talarolides Revisited: Cyclic Heptapeptides from an Australian Marine Tunicate-Associated Fungus, Talaromyces sp. CMB-TU011
Source: MDPI journal article supplement (doi:10.3390/md21090487), 2023-09-11
Supplement: s1 [file s1]

## Supplementary Materials

### **Talarolides Revisited, Cyclic Heptapeptides from an Australian Marine Tunicate-Associated Fungus, *Talaromyces* sp. CMB-TU011**

Angela A. Salim<sup>1,#</sup>, Waleed M. Hussein<sup>1,#</sup>, Pradeep Dewapriya<sup>1,2,#</sup>, Huy N. Hoang<sup>1</sup>, Yahao Zhou<sup>1</sup>,  
Kaumadi Samarasekera<sup>1,3</sup>, Zeinab G. Khalil<sup>1</sup>, David P. Fairlie<sup>1</sup> and and Robert J. Capon<sup>1,\*</sup>

<sup>1</sup> Institute for Molecular Bioscience; The University of Queensland, St Lucia, QLD 4072, Australia;

<sup>2</sup> Current address: Queensland Alliance for Environmental Health Science, The University of Queensland, Woolloongabba, QLD 4102.

<sup>3</sup> Current address: Department of Botany, Faculty of Science, University of Peradeniya, Peradeniya 204000, Sri Lanka.

# These authors contributed equally

\* Correspondence: r.capon@uq.edu.au (R.J.C.); Tel.: +61-7-3346-2979

## Table of Contents

|                                                                  |    |
|------------------------------------------------------------------|----|
| 1. MATRIX study of CMB-TU011 metabolites.....                    | 3  |
| 2. Spectroscopic data for talarolides A-D.....                   | 5  |
| 2.1. Talarolide A (1).....                                       | 5  |
| 2.2. Talarolide B (2).....                                       | 10 |
| 2.3. Talarolide C (3).....                                       | 16 |
| 2.4. Talarolide D (4).....                                       | 22 |
| 3. Marfey's analysis of talarolides A-D.....                     | 28 |
| 4. MSMS analysis of talarolides .....                            | 36 |
| 5. Synthetic dipeptides and synthetic talarolide B.....          | 40 |
| 6. ROE and distance restraints for talarolide A in DMSO-d6 ..... | 46 |

# 1. MATRIX study of CMB-TU011 metabolites

**Table S1: Media composition for the MATRIX**

| Media                | Composition (Per Liter)                                                                                                                                                                                                                                                                                                                                                            |
|----------------------|------------------------------------------------------------------------------------------------------------------------------------------------------------------------------------------------------------------------------------------------------------------------------------------------------------------------------------------------------------------------------------|
| M1 agar              | Peptone (2.0 g), Yeast extract (4.0 g), Starch (10.0 g), Agar (18.0 g). pH 7.0                                                                                                                                                                                                                                                                                                     |
| M1 salt agar         | Peptone (2.0 g), Yeast extract (4.0 g), Starch (10.0 g), ocean sea salt (33 g), Agar (18.0 g). pH 7.0                                                                                                                                                                                                                                                                              |
| ISP4 agar            | Soluble starch (10.0 g), CaCO <sub>3</sub> (2.0 g), (NH <sub>4</sub> ) <sub>2</sub> SO <sub>4</sub> (2.0 g), K <sub>2</sub> HPO <sub>4</sub> (1.0 g), MgSO <sub>4</sub> ·7H <sub>2</sub> O (1.0 g), NaCl (1.0 g), FeSO <sub>4</sub> ·7H <sub>2</sub> O (1 mg), MnCl <sub>2</sub> ·7H <sub>2</sub> O (1.0 mg), ZnSO <sub>4</sub> ·7H <sub>2</sub> O (1.0 mg), Agar (20.0 g). pH 7.2 |
| Tryptic soy agar     | Pancreatic digest of casein (15.0 g), Papaic digest of soybean (5.0 g), NaCl (5.0 g), Agar (15.0 g). pH 7.3                                                                                                                                                                                                                                                                        |
| Potato dextrose agar | Potato extract (4.0 g), Dextrose (20.0 g), Agar (15.0 g). pH 5.6                                                                                                                                                                                                                                                                                                                   |
| Oatmeal agar         | Oatmeal (60 g), Agar (12.4 g)                                                                                                                                                                                                                                                                                                                                                      |
| M2 agar              | Manitol (40.0 g), Maltose (40.0 g), Yeast extract (10.0 g), K <sub>2</sub> HPO <sub>4</sub> (2.0 g), MgSO <sub>4</sub> ·7H <sub>2</sub> O (0.5 g), FeSO <sub>4</sub> ·7H <sub>2</sub> O (0.01 g). pH 7.0                                                                                                                                                                           |
| PYG agar             | Peptone (1.25 g), Yeast Extract (1.25 g) Dextrose (3.0 g) Agar (20.0 g). pH 7.0                                                                                                                                                                                                                                                                                                    |
| Basal agar           | K <sub>2</sub> HPO <sub>4</sub> (1.5 g), MgSO <sub>4</sub> ·7H <sub>2</sub> O (0.025 g), CaCl <sub>2</sub> (0.025 g), FeSO <sub>4</sub> ·7H <sub>2</sub> O (0.015 g), and ZnSO <sub>4</sub> ·7H <sub>2</sub> O (0.005). pH 7.8                                                                                                                                                     |
| Czapeck agar         | K <sub>2</sub> HPO <sub>4</sub> (1.0 g), NaNO <sub>3</sub> (0.3 g), KCl (0.005 g), MgSO <sub>4</sub> ·7H <sub>2</sub> O (0.005 g), FeSO <sub>4</sub> (0.0001 g), Sucrose (30 g). pH 7.0                                                                                                                                                                                            |
| YES agar             | Sucrose (150 g), Yeat extract (20 g), MgSO <sub>4</sub> ·7H <sub>2</sub> O (0.5 g), ZnSO <sub>4</sub> ·7H <sub>2</sub> O (0.01 g), CuSO <sub>4</sub> ·5H <sub>2</sub> O (0.005 g). pH 7.0                                                                                                                                                                                          |
| ISP2 agar            | Yeast extract (4.0 g), Malt extract (10.0 g), Glucose (4.0 g), Agar (20.0 g). pH 7.2                                                                                                                                                                                                                                                                                               |

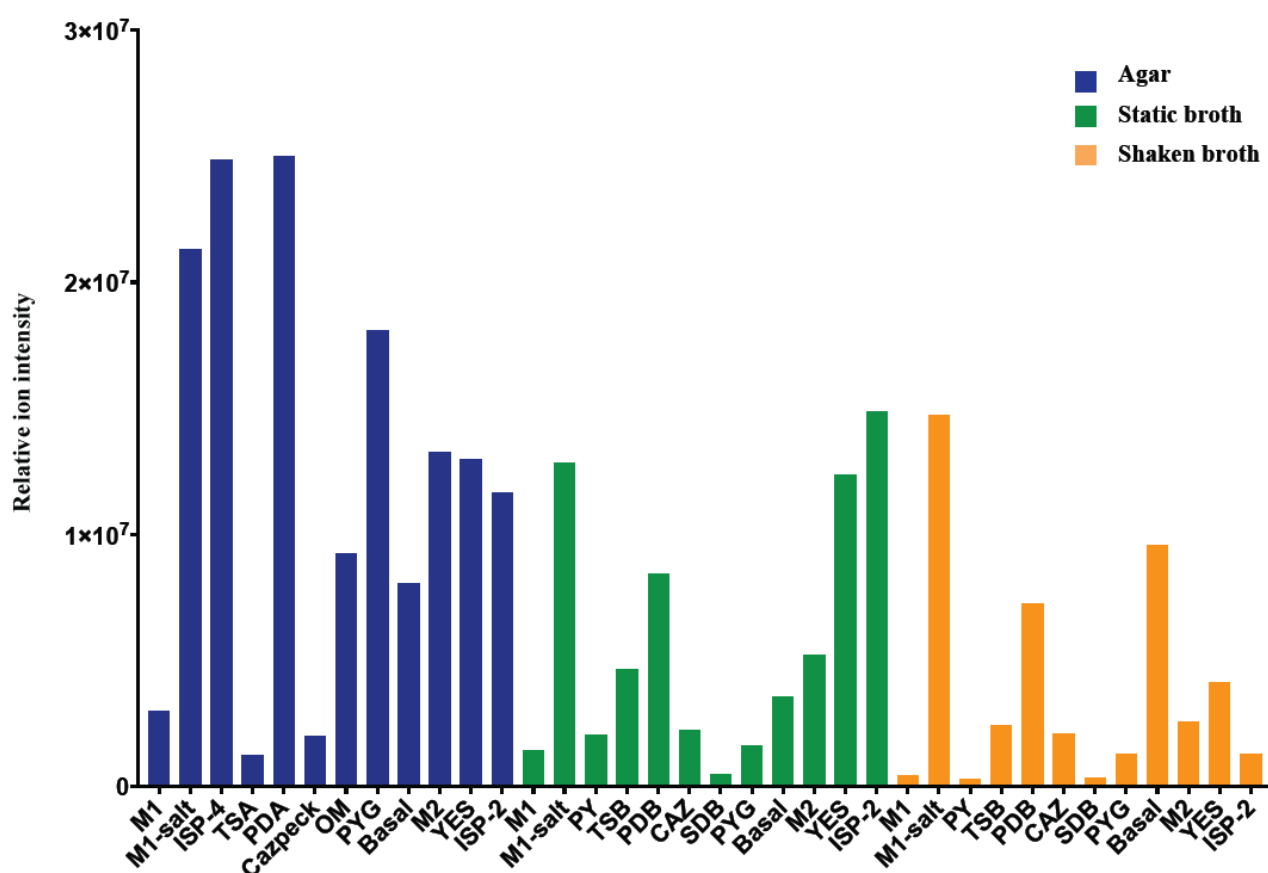

**Figure S1.** Talarolide A (1) production under different culture conditions. The expression level of talarolide A production was calculated based on the area under the peak for SIE at m/z 718 (M+H)<sup>+</sup> in HPLC-DAD-ESI(+)MS analysis.

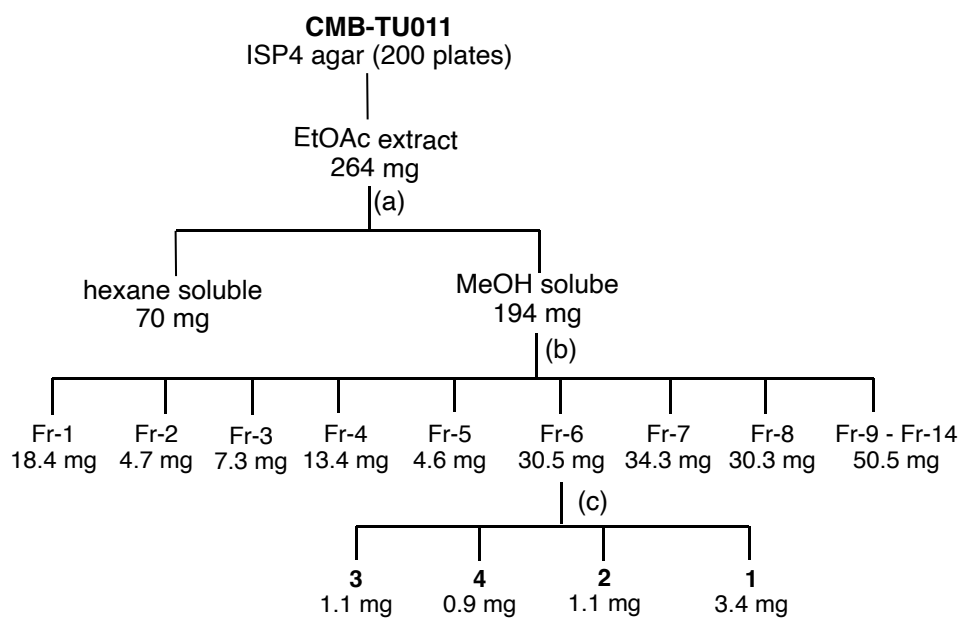

- (a) Partition [*n*-hexane / aqueous MeOH]  
 (b) Sephadex LH-20, MeOH  
 (c) Semiprep HPLC, Zorbax eclipse C<sub>8</sub>, 32% MeCN/H<sub>2</sub>O isocratic (0.01% TFA), 3 mL/min

**Figure S2.** Isolation scheme for CMB-TU011

## 2. Spectroscopic data for talarolides A-D

### 2.1. Talarolide A (1)

**Table S2:** NMR (DMSO-*d*<sub>6</sub>) data for talarolide A (1)

|                               |                   | $\delta_{\text{H}}$ , mult, ( <i>J</i> in Hz)                  | COSY                 | HMBC                                       | ROESY                                                                                                                                        |
|-------------------------------|-------------------|----------------------------------------------------------------|----------------------|--------------------------------------------|----------------------------------------------------------------------------------------------------------------------------------------------|
| <b>N-OH-Gly<sup>1</sup></b>   |                   |                                                                |                      |                                            |                                                                                                                                              |
| 1                             | 167.3             | -                                                              | -                    | -                                          | -                                                                                                                                            |
| 2                             | 50.2              | a 4.75, d (17.1)<br>b 3.76, d (17.1)                           | 2b<br>2a             | 1<br>1                                     | <i>N</i> -H(L-Ala)<br><i>N</i> -OH, <i>N</i> -H(L-Ala)                                                                                       |
| <i>N</i> -OH                  | 9.31, s           |                                                                | -                    | -                                          | 2b, 2(D-Ala), 2( <i>N</i> -Me-L-Tyr), <i>N</i> -H(D-allo-Ile), 6(D-allo-Ile), <i>N</i> -Me( <i>N</i> -Me-L-Ala)                              |
| <b>L-Ala<sup>2</sup></b>      |                   |                                                                |                      |                                            |                                                                                                                                              |
| 1                             | 174.1             | -                                                              | -                    | -                                          | -                                                                                                                                            |
| 2                             | 45.2              | 4.49, qd (6.8, 4.1)                                            | 3, <i>N</i> -H       | 3                                          | 3, <i>N</i> -H, <i>N</i> -Me( <i>N</i> -Me-D-Leu)                                                                                            |
| 3                             | 15.7              | 1.19, d (6.8)                                                  | 2                    | 1, 2                                       | 2, <i>N</i> -H                                                                                                                               |
| <i>N</i> -H                   | 8.65, d (4.1)     |                                                                | 2                    | 2, 3, 1( <i>N</i> -OH-Gly)                 | 2, 3, 2a( <i>N</i> -OH-Gly), 2b( <i>N</i> -OH-Gly)                                                                                           |
| <b>N-Me-D-Leu<sup>3</sup></b> |                   |                                                                |                      |                                            |                                                                                                                                              |
| 1                             | 169.5             | -                                                              | -                    | -                                          | -                                                                                                                                            |
| 2                             | 54.5              | 5.05, dd (11.8, 3.9)                                           | 3a, 3b               | 1, 3, <i>N</i> -Me, 1(L-Ala)               | 3a, 3b, 4, 5, <i>N</i> -Me, <i>N</i> -H(D-allo-Ile)                                                                                          |
| 3                             | 36.0              | a 1.79, ddd (14.4, 10.3, 3.9)<br>b 1.58, ddd (14.4, 11.8, 3.9) | 2, 3b, 4<br>2, 3a, 4 | 2, 4, 5, 6<br>2, 5                         | 2, 5, 6<br>4, 6, <i>N</i> -Me                                                                                                                |
| 4                             | 24.4              | 1.37, m                                                        | 3a, 3b, 5, 6         | 5, 6                                       | 2, 3b, 5, 6, <i>N</i> -Me                                                                                                                    |
| 5                             | 21.0              | 0.77, d (6.5)                                                  | 4                    | 3, 4, 6                                    | 2, 3a, 4                                                                                                                                     |
| 6                             | 23.3              | 0.88, d (6.5)                                                  | 4                    | 3, 4, 5                                    | 3a, 3b, 4                                                                                                                                    |
| <i>N</i> -Me                  | 31.0              | 3.00, s                                                        | -                    | 2, 1(L-Ala)                                | 2, 3b, 4, 2(L-Ala), <i>N</i> -H(D-allo-Ile), 6(D-allo-Ile)                                                                                   |
| <b>D-allo-Ile<sup>4</sup></b> |                   |                                                                |                      |                                            |                                                                                                                                              |
| 1                             | 172.0             | -                                                              | -                    | -                                          | -                                                                                                                                            |
| 2                             | 53.7              | 4.72 <sup>b</sup>                                              | 3, <i>N</i> -H       | 1, 3, 6, 1( <i>N</i> -Me-D-Leu)            | 3, 4a, 4b, 5, 6, <i>N</i> -H, <i>N</i> -H(D-Ala)                                                                                             |
| 3                             | 38.5              | 1.95, m                                                        | 2, 4a, 4b, 6         | 4, 5, 6                                    | 2, 4a, 5, <i>N</i> -H, <i>N</i> -H(D-Ala)                                                                                                    |
| 4                             | 26.2              | a 1.42, m<br>b 1.07, m                                         | 3, 4b, 5<br>3, 4b, 5 | 2, 3, 5, 6<br>2, 3, 5, 6                   | 2, 3, 5, 6<br>2, 3, 5, 6                                                                                                                     |
| 5                             | 12.0              | 0.94, dd (7.3, 7.3)                                            | 4a, 4b               | 3, 4                                       | 2, 3, 4a, 4b, 5/9( <i>N</i> -Me-L-Tyr)                                                                                                       |
| 6                             | 13.7              | 0.81, d (6.9)                                                  | 3                    | 2, 3, 4                                    | 2, 4a, 4b, <i>N</i> -H, <i>N</i> -Me( <i>N</i> -Me-D-Leu), 2( <i>N</i> -Me-L-Tyr), 5/9( <i>N</i> -Me-L-Tyr), <i>N</i> -OH( <i>N</i> -OH-Gly) |
| <i>N</i> -H                   | 7.24, d (9.6)     |                                                                | 2                    | 2, 1( <i>N</i> -Me-D-Leu)                  | 2, 3, 6, 2( <i>N</i> -Me-D-Leu), <i>N</i> -Me( <i>N</i> -Me-D-Leu), <i>N</i> -OH( <i>N</i> -OH-Gly)                                          |
| <b>D-Ala<sup>5</sup></b>      |                   |                                                                |                      |                                            |                                                                                                                                              |
| 1                             | 171.1             | -                                                              | -                    | -                                          | -                                                                                                                                            |
| 2                             | 45.8              | 4.34, qd (7.1, 5.4)                                            | 3, <i>N</i> -H       | 1, 3                                       | 3, <i>N</i> -H, <i>N</i> -OH( <i>N</i> -OH-Gly), <i>N</i> -Me( <i>N</i> -Me-L-Ala)                                                           |
| 3                             | 14.9              | 1.12, d (7.1)                                                  | 2                    | 1, 2                                       | 2, <i>N</i> -H, <i>N</i> -Me( <i>N</i> -Me-L-Ala)                                                                                            |
| <i>N</i> -H                   | 8.87, d (5.4)     |                                                                | 2                    | 2, 3, 1(D-allo-Ile)                        | 2, 3, 2(D-allo-Ile), 3(D-allo-Ile)                                                                                                           |
| <b>N-Me-L-Ala<sup>6</sup></b> |                   |                                                                |                      |                                            |                                                                                                                                              |
| 1                             | 169.8             | -                                                              | -                    | -                                          | -                                                                                                                                            |
| 2                             | 46.7              | 4.71 <sup>b</sup>                                              | 3                    | 1, 3, <i>N</i> -Me, 1(D-Ala)               | 3, 5/9( <i>N</i> -Me-L-Tyr), 6/8( <i>N</i> -Me-L-Tyr)                                                                                        |
| 3                             | 15.1              | 0.49, d (6.5)                                                  | 2                    | 1, 2                                       | 2, <i>N</i> -Me, 5/9( <i>N</i> -Me-L-Tyr), 6/8( <i>N</i> -Me-L-Tyr)                                                                          |
| <i>N</i> -Me                  | 28.6 <sup>a</sup> | 2.70, s                                                        | -                    | 2, 1(D-Ala)                                | 3, 2(D-Ala), 3(D-Ala), <i>N</i> -OH( <i>N</i> -OH-Gly),                                                                                      |
| <b>N-Me-L-Tyr<sup>7</sup></b> |                   |                                                                |                      |                                            |                                                                                                                                              |
| 1                             | 168.2             | -                                                              | -                    | -                                          | -                                                                                                                                            |
| 2                             | 56.6              | 4.80, dd (10.5, 4.9)                                           | 3a, 3b               | 1, 3, <i>N</i> -Me, 1( <i>N</i> -Me-L-Ala) | 3b, 5/9, <i>N</i> -OH( <i>N</i> -OH-Gly), 6(D-allo-Ile)                                                                                      |
| 3                             | 34.1              | a 2.84, dd (14.3, 10.5)<br>b 2.60, dd (14.3, 4.9)              | 2, 3b<br>2, 3a       | 2, 4, 5/9<br>2, 4, 5/9                     | 5/9<br>2, 5/9                                                                                                                                |
| 4                             | 126.6             | -                                                              | -                    | -                                          | -                                                                                                                                            |
| 5/9                           | 130.8             | 6.93, d (8.4)                                                  | 6/8                  | 3, 7, 9/5                                  | 2, 3a, 3b, 6/8, <i>N</i> -Me, 2( <i>N</i> -Me-L-Ala), 3( <i>N</i> -Me-L-Ala), 5(D-allo-Ile), 6(D-allo-Ile)                                   |
| 6/8                           | 114.8             | 6.64, d (8.4)                                                  | 5/9                  | 4, 7, 8/6                                  | 5/9, 7-OH, 2( <i>N</i> -Me-L-Ala), 3( <i>N</i> -Me-L-Ala)                                                                                    |
| 7                             | 155.9             | -                                                              | -                    | -                                          | -                                                                                                                                            |
| 7-OH                          | 9.20, s           |                                                                | -                    | 6/8, 7                                     | 6/8                                                                                                                                          |
| <i>N</i> -Me                  | 28.6 <sup>a</sup> | 2.66, s                                                        | -                    | 2, 1( <i>N</i> -Me-L-Ala)                  | 5/9                                                                                                                                          |

<sup>a-b</sup>signals within the same superscripts are overlapping

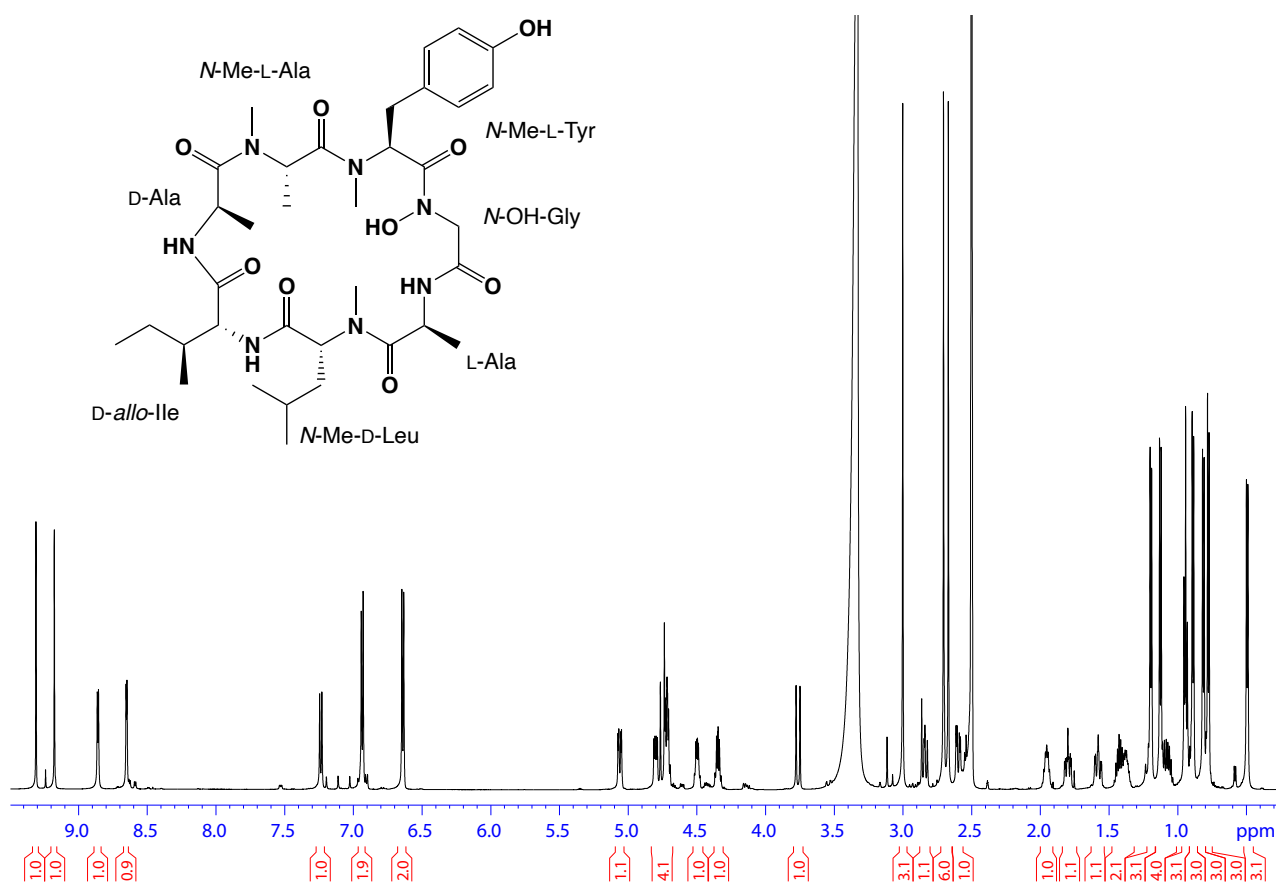

**Figure S3.**  $^1\text{H}$  NMR (600 MHz,  $\text{DMSO}-d_6$ ) spectrum of talarolide A (**1**)

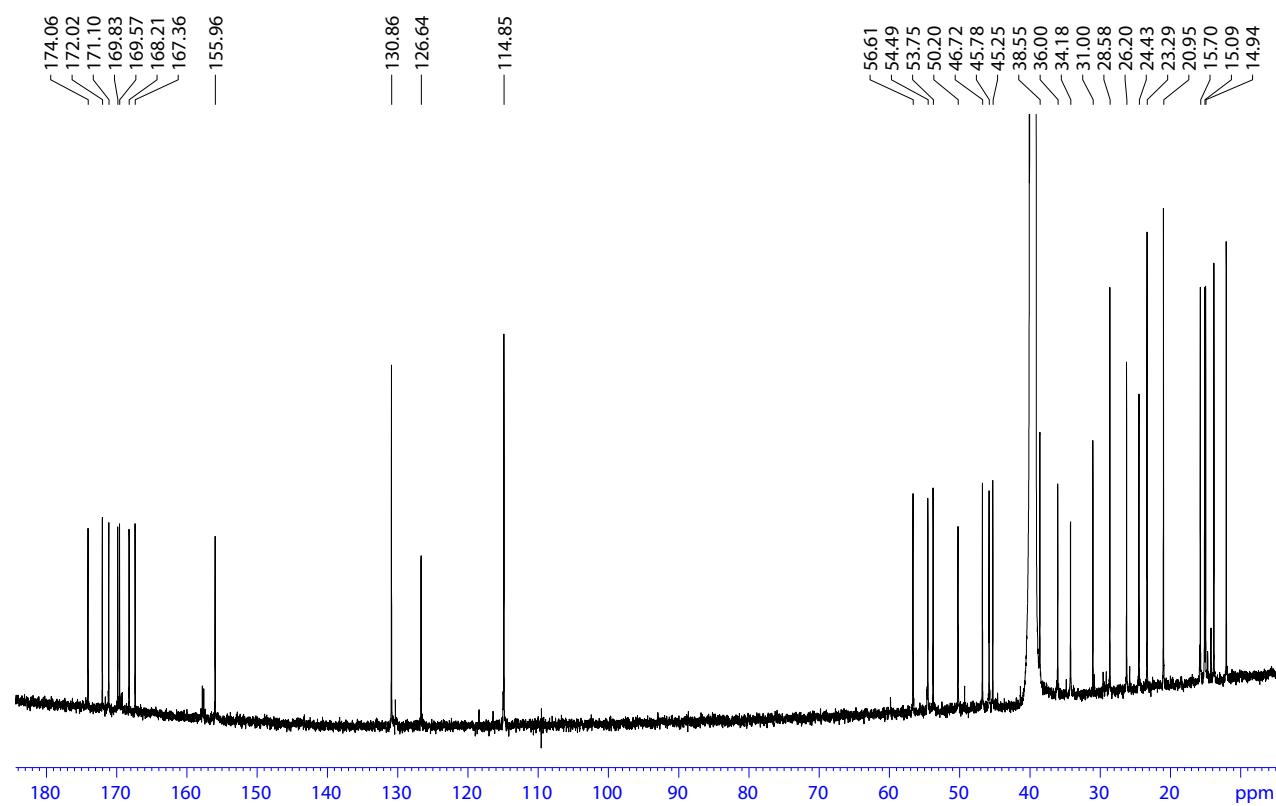

**Figure S4.**  $^{13}\text{C}$  NMR (150 MHz,  $\text{DMSO}-d_6$ ) spectrum of talarolide A (**1**)

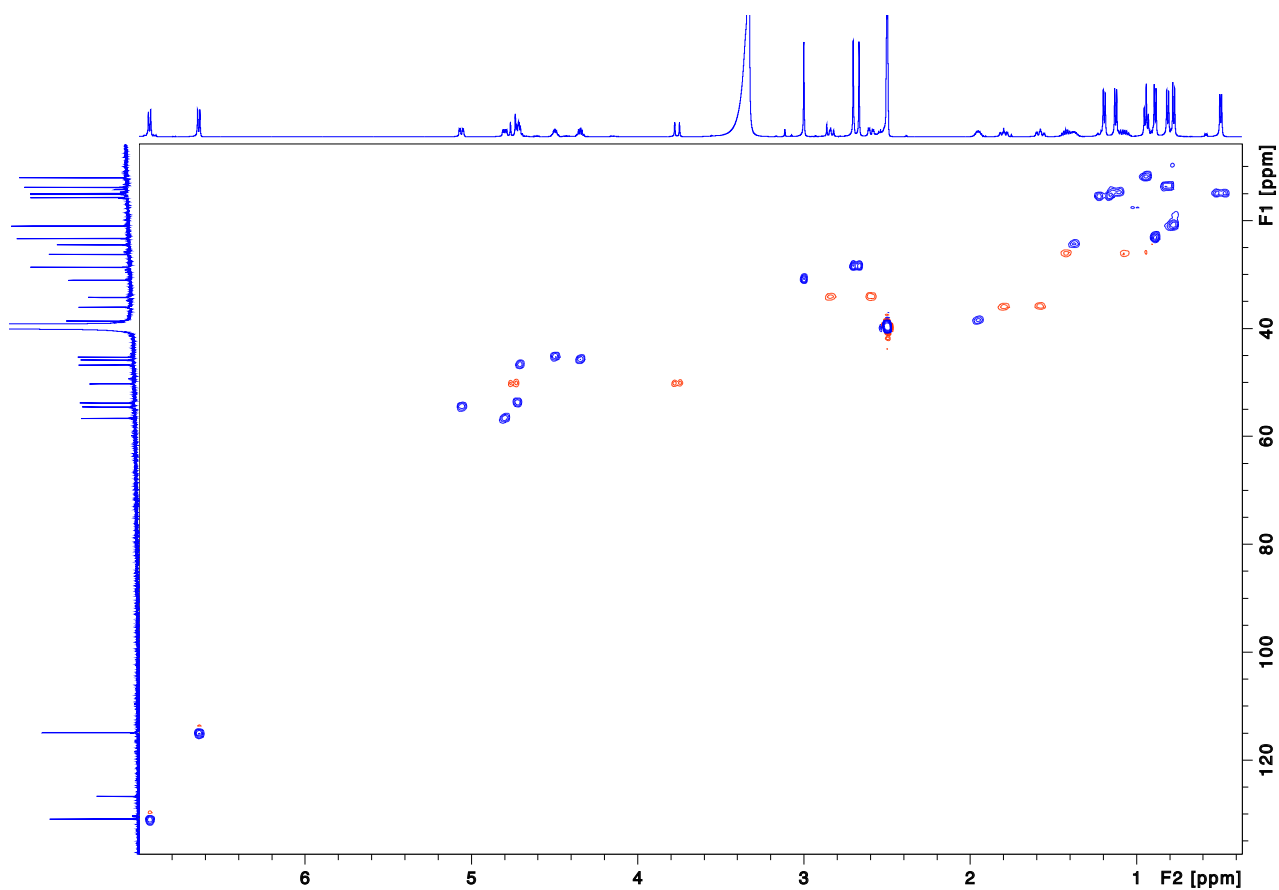

**Figure S5.** HSQC (600 MHz, DMSO- $d_6$ ) spectrum of talarolide A (**1**)

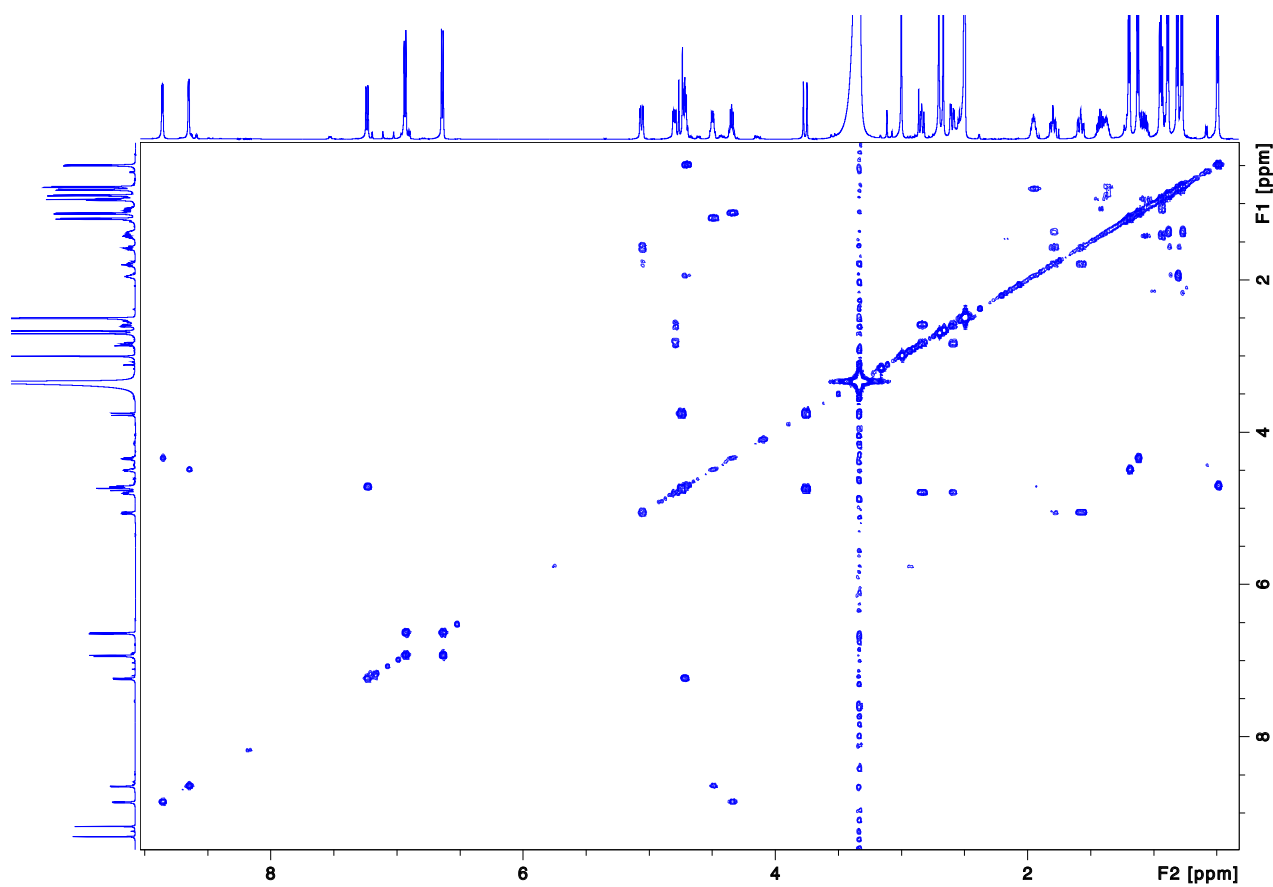

**Figure S6.** COSY (600 MHz, DMSO- $d_6$ ) spectrum of talarolide A (**1**)

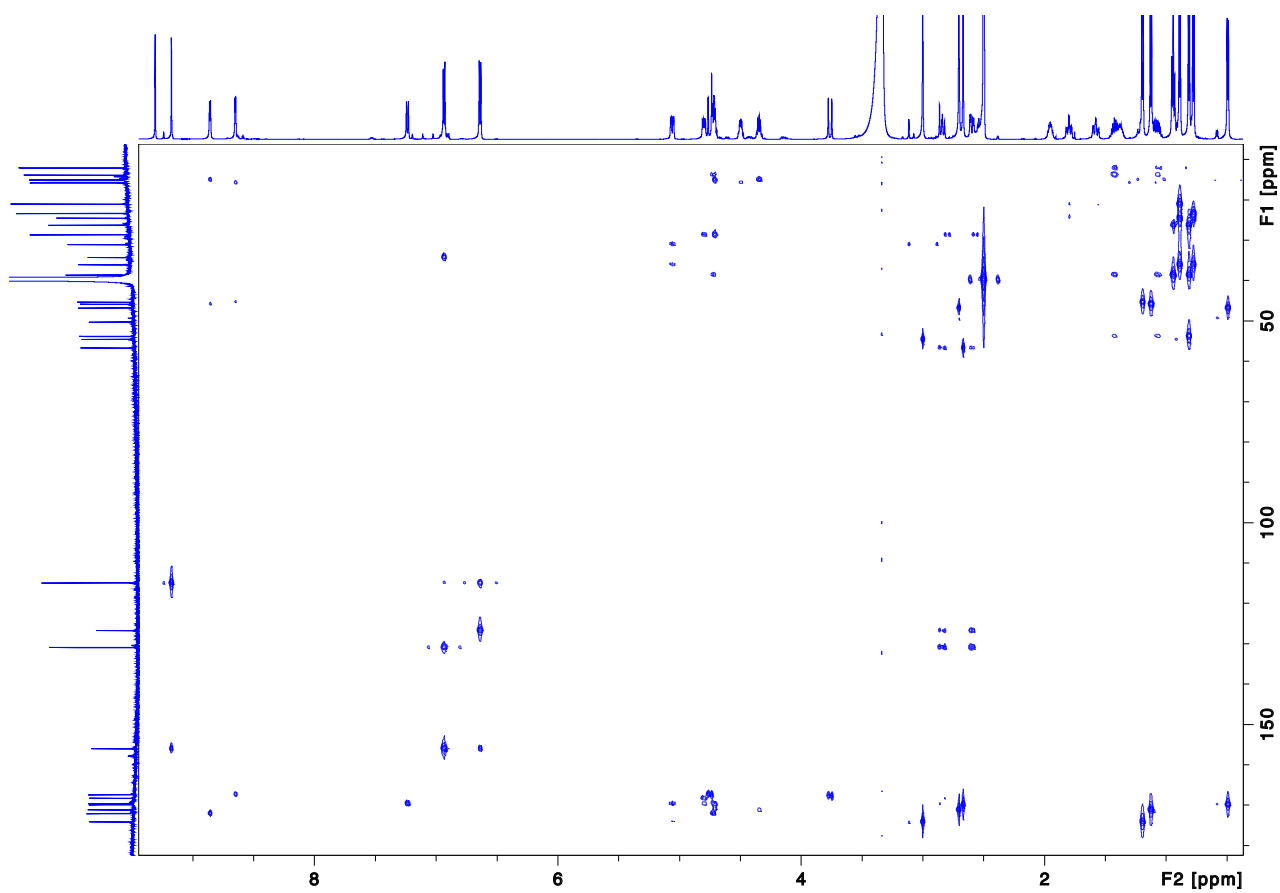

**Figure S7.** HMBC (600 MHz, DMSO-*d*<sub>6</sub>) spectrum of talarolide A (**1**)

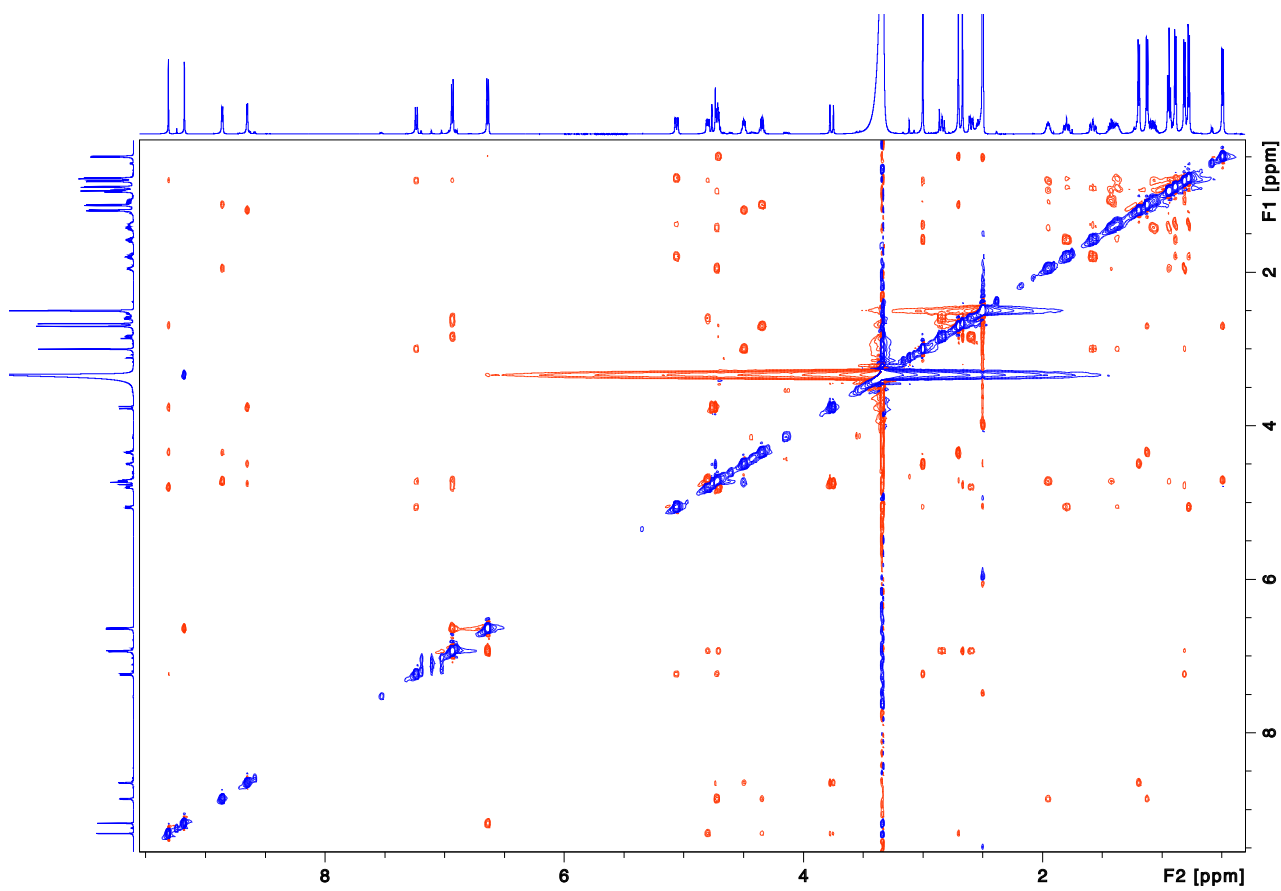

**Figure S8.** ROESY (600 MHz, DMSO-*d*<sub>6</sub>) spectrum of talarolide A (**1**)

## Mass Spectrum Molecular Formula Report

### Analysis Info

Analysis Name D:\Data\A.salim\Talarolide A.d  
 Method tune-med\_AP.m  
 Sample Name  
 Comment

Acquisition Date 10/21/2022 12:45:34 PM  
 Operator a.salim  
 Instrument / Ser# micrOTOF 213750.00  
 232

### Acquisition Parameter

|             |            |                      |          |                  |           |
|-------------|------------|----------------------|----------|------------------|-----------|
| Source Type | ESI        | Ion Polarity         | Positive | Set Nebulizer    | 0.8 Bar   |
| Focus       | Not active |                      |          | Set Dry Heater   | 180 °C    |
| Scan Begin  | 100 m/z    | Set Capillary        | 4500 V   | Set Dry Gas      | 5.0 l/min |
| Scan End    | 1000 m/z   | Set End Plate Offset | -500 V   | Set Divert Valve | Source    |

### Generate Molecular Formula Parameter

|                  |  |                        |  |         |  |
|------------------|--|------------------------|--|---------|--|
| Formula, min.    |  | Tolerance              |  | Charge  |  |
| Formula, max.    |  | Minimum                |  | Maximum |  |
| Measured m/z     |  | Electron Configuration |  | Maximum |  |
| Check Valence    |  | Minimum                |  |         |  |
| Nitrogen Rule    |  |                        |  |         |  |
| Filter H/C Ratio |  |                        |  |         |  |
| Estimate Carbon  |  |                        |  |         |  |

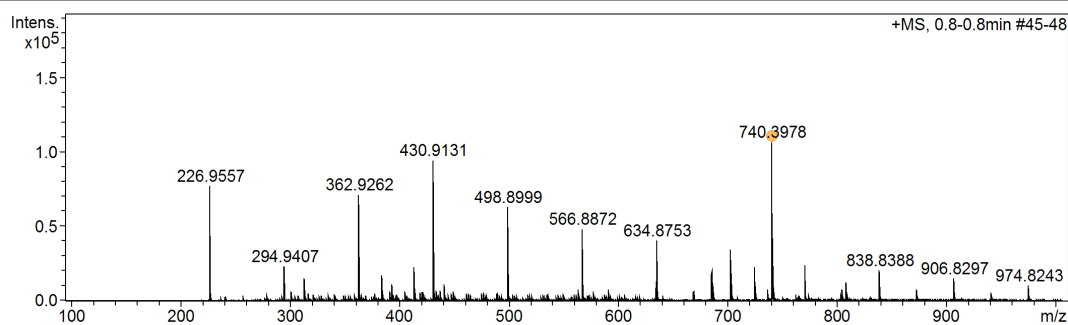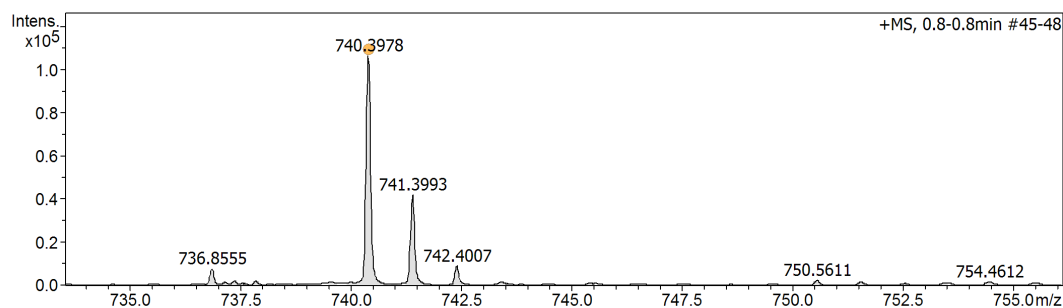

| Meas. m/z | # | Ion Formula                                                     | m/z      | err [ppm] | mSigma | # Sigma | Score  | rdb  | e <sup>-</sup> Conf | N-Rule |
|-----------|---|-----------------------------------------------------------------|----------|-----------|--------|---------|--------|------|---------------------|--------|
| 740.3978  | 1 | C <sub>35</sub> H <sub>55</sub> N <sub>7</sub> NaO <sub>9</sub> | 740.3953 | 3.3       | 13.1   | 2       | 100.00 | 11.5 | even                | ok     |

**Figure S9.** HRMS measurement for talarolide A (1)

## 2.2. Talarolide B (2)

**Table S3.** NMR (DMSO-*d*<sub>6</sub>) data for talarolide B (2)

|                                      |                    | $\delta_{\text{H}}$ , mult, ( <i>J</i> in Hz)                  | COSY                               | HMBC                         | ROESY                                                              |
|--------------------------------------|--------------------|----------------------------------------------------------------|------------------------------------|------------------------------|--------------------------------------------------------------------|
| <b>Gly<sup>1</sup></b>               |                    |                                                                |                                    |                              |                                                                    |
| 1                                    | 169.3              | -                                                              | -                                  | -                            | -                                                                  |
| 2                                    | 41.3               | a 4.14 <sup>d</sup><br>b 3.54, dd (17.3, 2.9)                  | 2b, <i>N</i> -H<br>2a, <i>N</i> -H | 1<br>1                       | <i>N</i> -H, <i>N</i> -H(L-Ala)<br><i>N</i> -H, <i>N</i> -H(L-Ala) |
| <i>N</i> -H                          |                    | 7.53, dd (7.6, 2.9)                                            | 2a, 2b                             | 1( <i>N</i> -Me-L-Tyr)       | 2a, 2b, 2( <i>N</i> -Me-L-Tyr)                                     |
| <b>L-Ala<sup>2</sup></b>             |                    |                                                                |                                    |                              |                                                                    |
| 1                                    | 174.4              | -                                                              | -                                  | -                            | -                                                                  |
| 2                                    | 44.6               | 4.67, qd (6.7, 5.9)                                            | 3, <i>N</i> -H                     | 1, 3                         | 3, <i>N</i> -H, <i>N</i> -Me( <i>N</i> -Me-D-Leu)                  |
| 3                                    | 15.8               | 1.20, d (6.7)                                                  | 2                                  | 1, 2                         | 2, <i>N</i> -H                                                     |
| <i>N</i> -H                          |                    | 8.59, d (5.9)                                                  | 2                                  | 2, 3, 1(Gly)                 | 2, 3, 2a(Gly), 2b(Gly)                                             |
| <b><i>N</i>-Me-D-Leu<sup>3</sup></b> |                    |                                                                |                                    |                              |                                                                    |
| 1                                    | 169.2 <sup>a</sup> | -                                                              | -                                  | -                            | -                                                                  |
| 2                                    | 54.6 <sup>b</sup>  | 5.05, dd (11.8, 3.8)                                           | 3a, 3b                             | 1, 3, <i>N</i> -Me           | 3a, 3b, 4, 5, <i>N</i> -Me, <i>N</i> -H(D- <i>allo</i> -Ile)       |
| 3                                    | 36.1               | a 1.82, ddd (14.4, 10.5, 3.8)<br>b 1.61, ddd (14.4, 11.8, 3.7) | 2, 3b, 4<br>2, 3a, 4               | 4<br>-                       | 2<br>2, <i>N</i> -Me                                               |
| 4                                    | 24.4               | 1.39, m                                                        | 3a, 3b, 5, 6                       | -                            | 2                                                                  |
| 5                                    | 20.9               | 0.79, d (6.5)                                                  | 4                                  | 3, 4, 6                      | 2                                                                  |
| 6                                    | 23.3               | 0.90, d (6.5)                                                  | 4                                  | 3, 4, 5                      | -                                                                  |
| <i>N</i> -Me                         | 30.8               | 3.11, s                                                        | -                                  | 2, 1(L-Ala)                  | 2, 3b, 2(L-Ala), <i>N</i> -H(D- <i>allo</i> -Ile)                  |
| <b>D-<i>allo</i>-Ile<sup>4</sup></b> |                    |                                                                |                                    |                              |                                                                    |
| 1                                    | 171.2              | -                                                              | -                                  | -                            | -                                                                  |
| 2                                    | 54.6 <sup>b</sup>  | 4.60, dd (9.3, 5.2)                                            | 3, <i>N</i> -H                     | 1, 3, 6                      | 3, 4a, 5, 6, <i>N</i> -H, <i>N</i> -H(D-Ala)                       |
| 3                                    | 38.5               | 1.95, m                                                        | 2, 4b, 6                           | 4, 5, 6                      | 2, 6, <i>N</i> -H(D-Ala)                                           |
| 4                                    | 25.7               | a 1.56, m<br>b 1.09 <sup>e</sup>                               | 4b, 5<br>3, 4a, 5                  | 2, 3, 5, 6<br>2, 3, 5, 6     | 2<br>-                                                             |
| 5                                    | 12.0               | 0.95, dd (7.3, 7.3)                                            | 4a, 4b                             | 3, 4                         | 2                                                                  |
| 6                                    | 14.2 <sup>c</sup>  | 0.92, d (6.9)                                                  | 3                                  | 2, 3, 4                      | 2, 3, <i>N</i> -H                                                  |
| <i>N</i> -H                          |                    | 6.96, d (9.3)                                                  | 2                                  | 1( <i>N</i> -Me-D-Leu)       | 2, 6, 2( <i>N</i> -Me-D-Leu), <i>N</i> -Me( <i>N</i> -Me-D-Leu)    |
| <b>D-Ala<sup>5</sup></b>             |                    |                                                                |                                    |                              |                                                                    |
| 1                                    | 171.6              | -                                                              | -                                  | -                            | -                                                                  |
| 2                                    | 45.7               | 4.42 <sup>f</sup>                                              | 3, <i>N</i> -H                     | 1, 3                         | 3, <i>N</i> -H                                                     |
| 3                                    | 14.6               | 1.10 <sup>e</sup> , d (7.1)                                    | 2                                  | 2, 1                         | 2, <i>N</i> -H                                                     |
| <i>N</i> -H                          |                    | 8.63, d (5.4)                                                  | 2                                  | 2, 3, 1(D- <i>allo</i> -Ile) | 2, 3, 2(D- <i>allo</i> -Ile), 3(D- <i>allo</i> -Ile)               |
| <b><i>N</i>-Me-L-Ala<sup>6</sup></b> |                    |                                                                |                                    |                              |                                                                    |
| 1                                    | 169.8              | -                                                              | -                                  | -                            | -                                                                  |
| 2                                    | 49.3               | 4.43 <sup>f</sup>                                              | 3                                  | 1, 3, <i>N</i> -Me           | 3, <i>N</i> -Me, 2( <i>N</i> -Me-L-Tyr), 5/9( <i>N</i> -Me-L-Tyr)  |
| 3                                    | 14.2 <sup>c</sup>  | 0.58, d (6.5)                                                  | 2                                  | 1, 2                         | 2                                                                  |
| <i>N</i> -Me                         | 29.1               | 2.70, s                                                        | -                                  | 2, 1(D-Ala)                  | 2                                                                  |
| <b><i>N</i>-Me-L-Tyr<sup>7</sup></b> |                    |                                                                |                                    |                              |                                                                    |
| 1                                    | 169.2 <sup>a</sup> | -                                                              | -                                  | -                            | -                                                                  |
| 2                                    | 59.8               | 4.15 <sup>d</sup>                                              | 3a, 3b                             | 1, <i>N</i> -Me              | 3b, 5/9, <i>N</i> -H(Gly), 2( <i>N</i> -Me-L-Ala)                  |
| 3                                    | 34.8               | a 2.93, dd (14.1, 11.6)<br>b 2.55 <sup>g</sup>                 | 2, 3b<br>2, 3a                     | 2, 4, 5/9<br>5/9             | 5/9<br>2, 5/9                                                      |
| 4                                    | 126.5              | -                                                              | -                                  | -                            | -                                                                  |
| 5/9                                  | 130.3              | 6.90, d (8.4)                                                  | 6/8                                | 3, 7, 9/5                    | 2, 3a, 3b, <i>N</i> -Me, 2( <i>N</i> -Me-L-Ala)                    |
| 6/8                                  | 114.9              | 6.63, d (8.4)                                                  | 5/9                                | 4, 7, 8/6                    | 7-OH                                                               |
| 7                                    | 156.0              | -                                                              | -                                  | -                            | -                                                                  |
| 7-OH                                 |                    | 9.25, s                                                        | -                                  | 6/8, 7                       | 6/8                                                                |
| <i>N</i> -Me                         | 29.5               | 2.86, s                                                        | -                                  | 2, 1( <i>N</i> -Me-L-Ala)    | 5/9                                                                |

<sup>a-f</sup> signals within the same superscripts are overlapping; <sup>g</sup> signal under DMSO peak

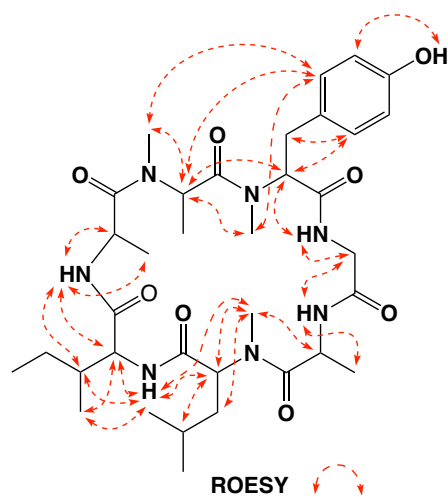

**Figure S10.** ROESY (DMSO- $d_6$ ) correlations for talarolide B (**2**)

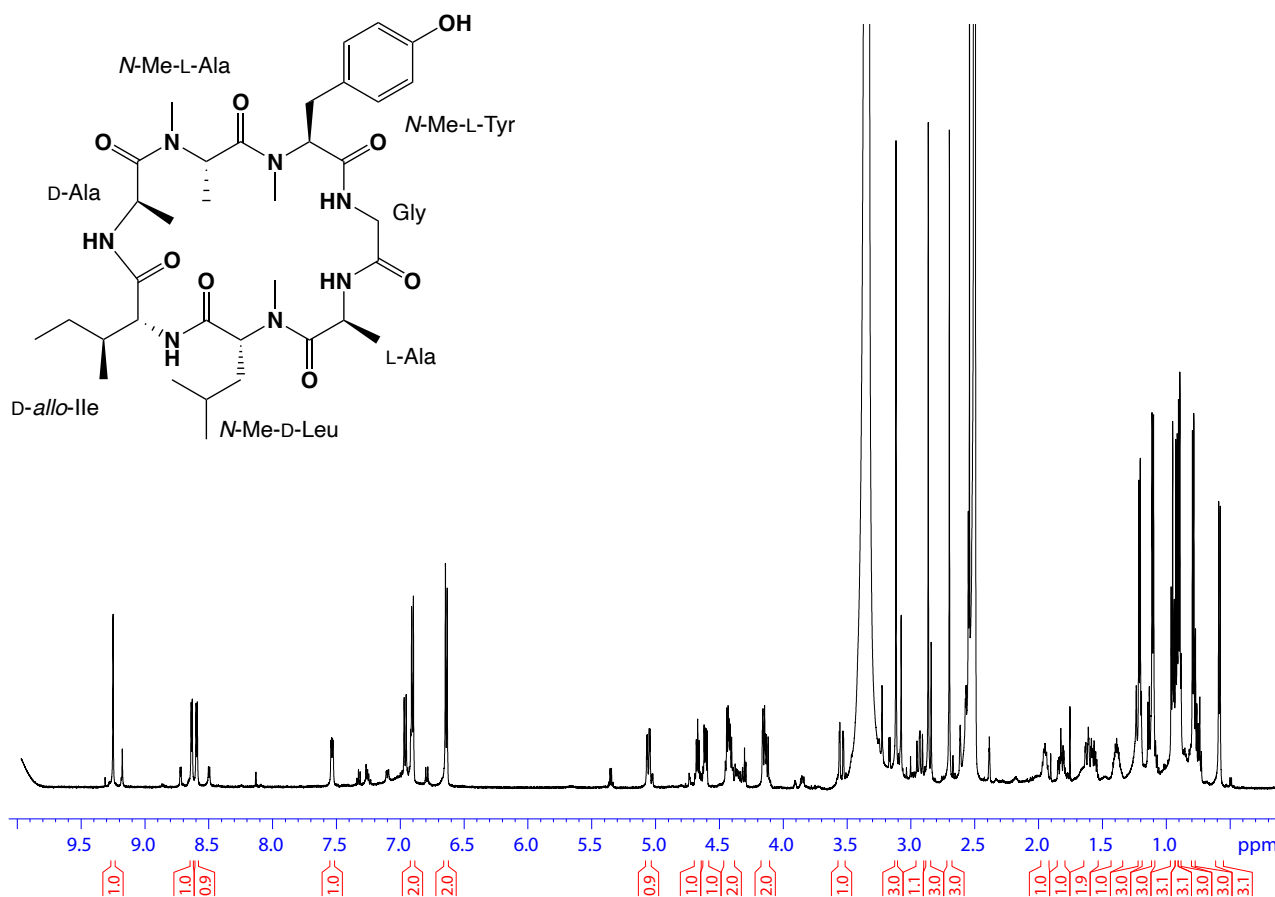

**Figure S11.**  $^1\text{H}$  NMR (600 MHz,  $\text{DMSO}-d_6$ ) spectrum of talarolide B (2)

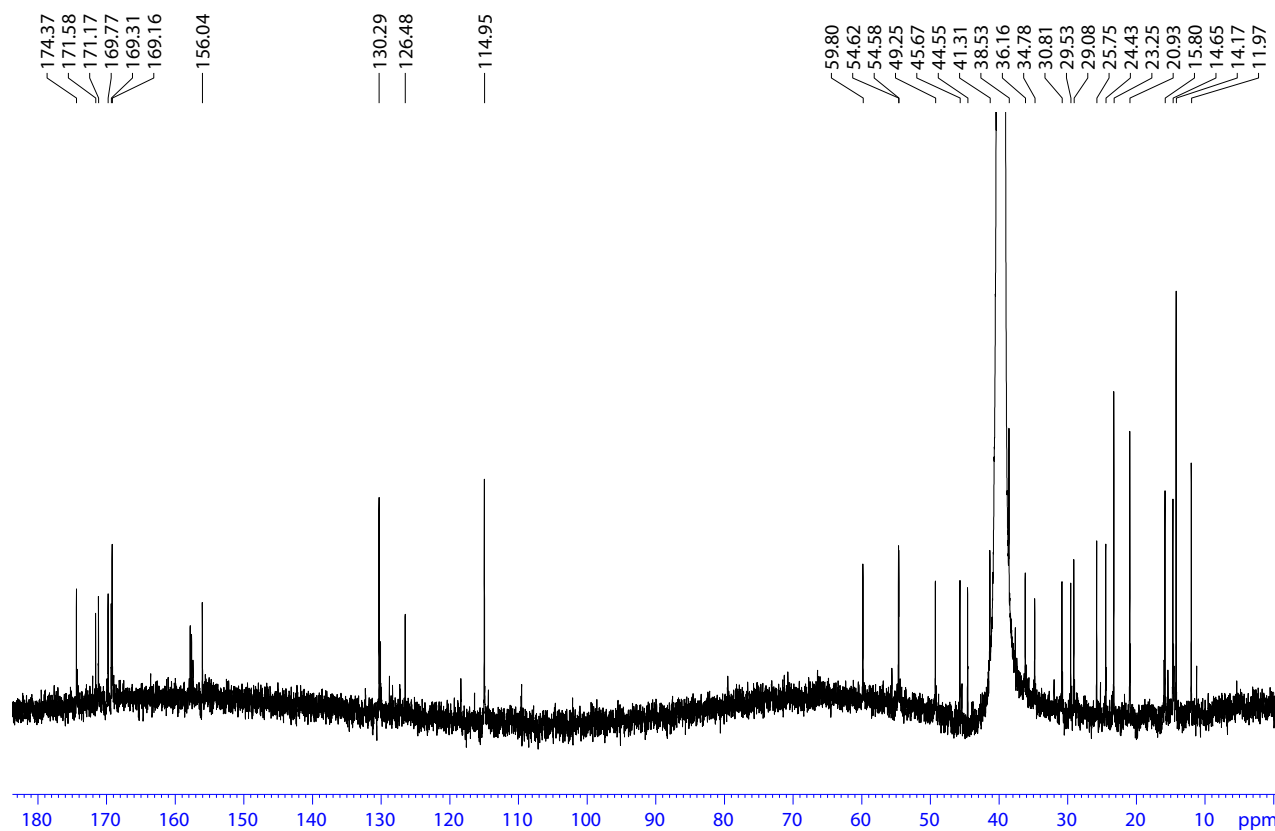

**Figure S12.**  $^{13}\text{C}$  NMR (150 MHz,  $\text{DMSO}-d_6$ ) spectrum of talarolide B (2)

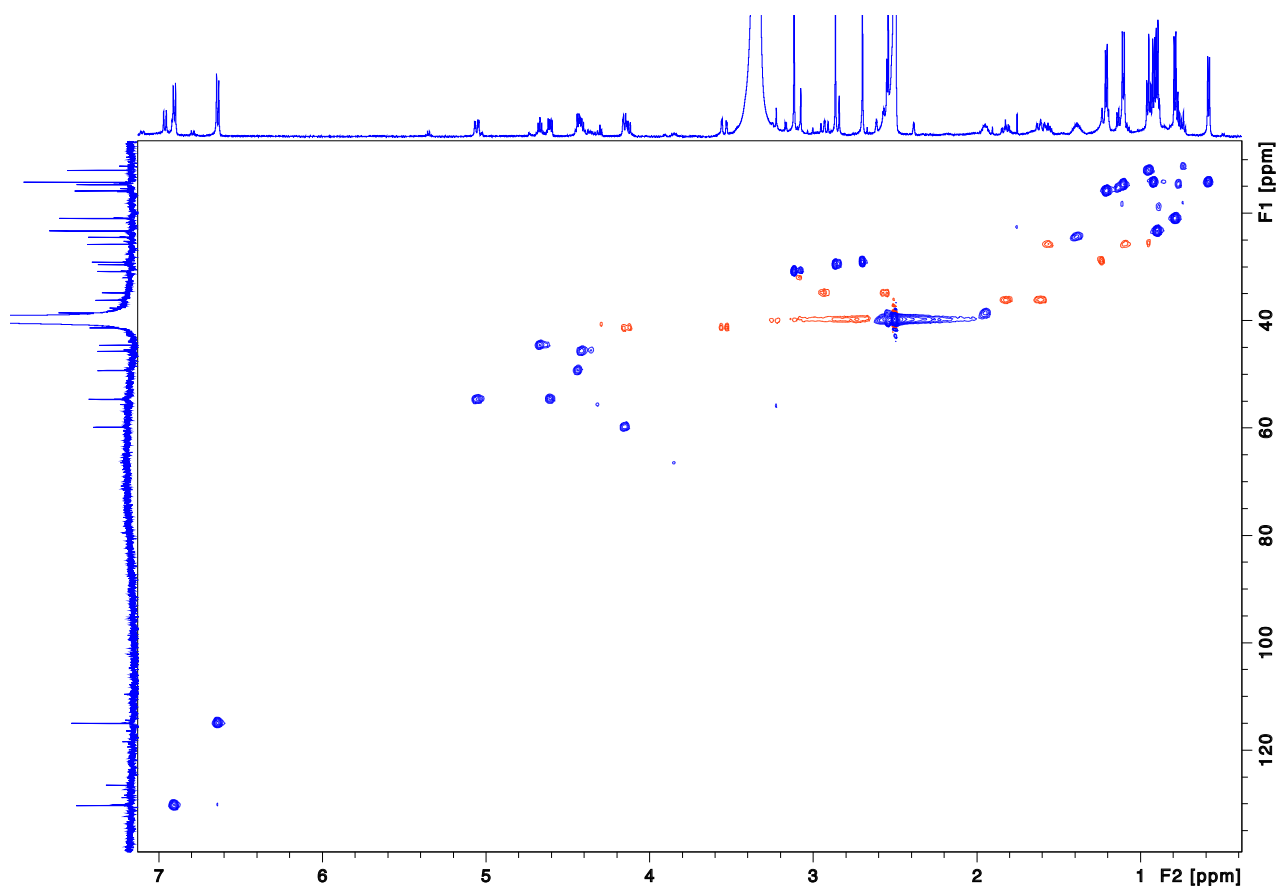

**Figure S13.** HSQC (600 MHz, DMSO- $d_6$ ) spectrum of talarolide B (**2**)

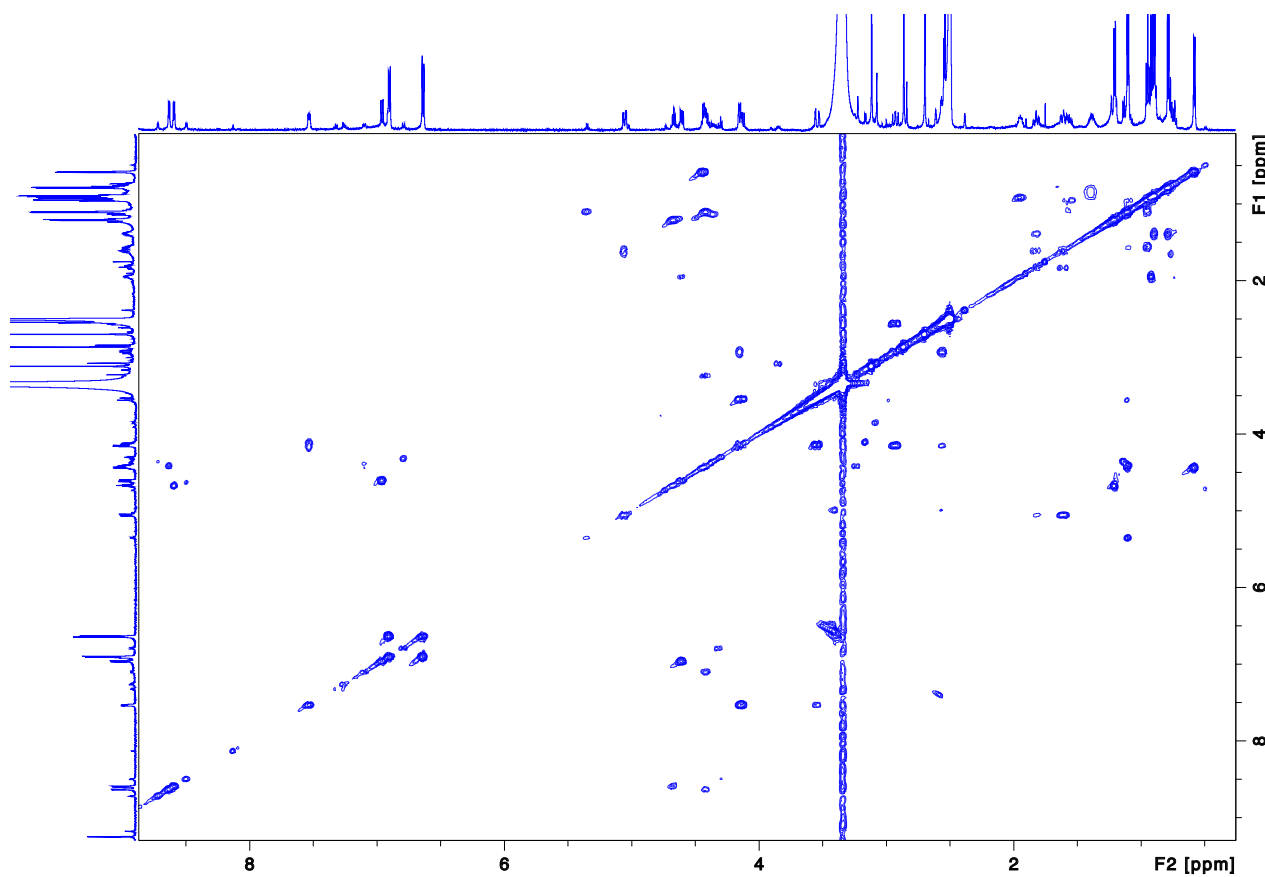

**Figure S14.** COSY (600 MHz, DMSO- $d_6$ ) spectrum of talarolide B (**2**)

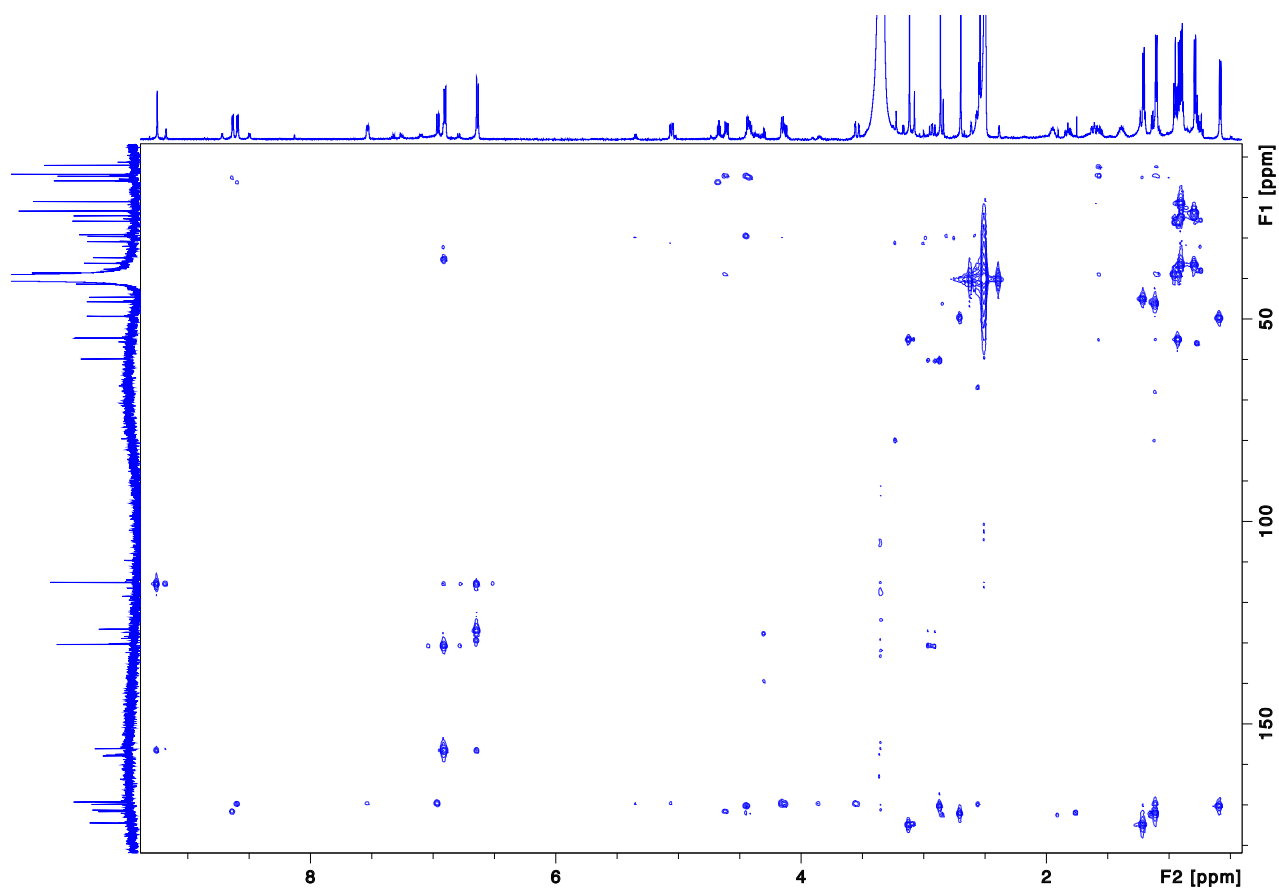

**Figure S15.** HMBC (600 MHz, DMSO- $d_6$ ) spectrum of talarolide B (**2**)

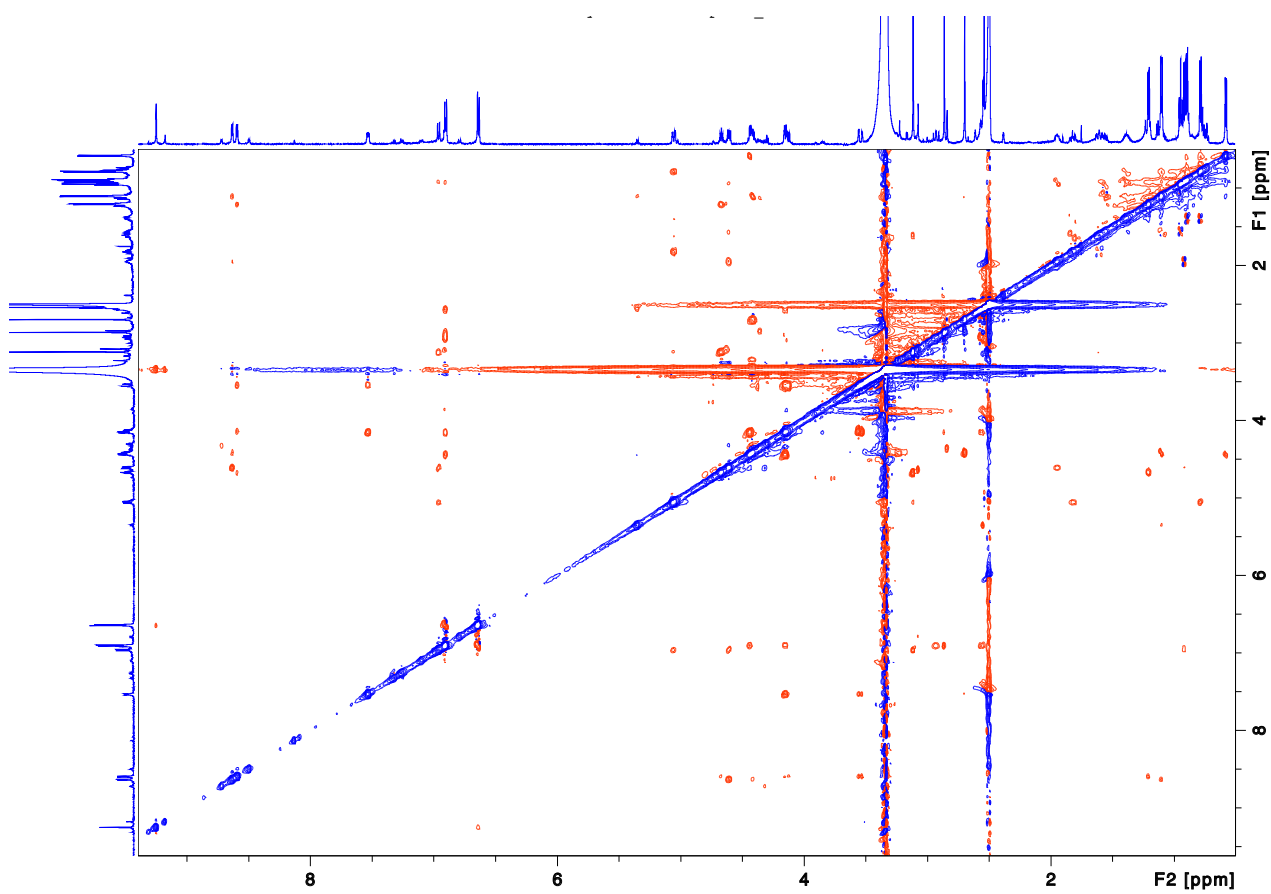

**Figure S16.** ROESY (600 MHz, DMSO- $d_6$ ) spectrum of talarolide B (**2**)

## Mass Spectrum Molecular Formula Report

### Analysis Info

Analysis Name D:\Data\A.salim\Talarolide B.d  
 Method tune-med\_AP.m  
 Sample Name  
 Comment

Acquisition Date 10/21/2022 10:52:27 AM

Operator a.salim  
 Instrument / Ser# micrOTOF 213750.00  
 232

### Acquisition Parameter

|             |            |                      |          |                  |           |
|-------------|------------|----------------------|----------|------------------|-----------|
| Source Type | ESI        | Ion Polarity         | Positive | Set Nebulizer    | 0.8 Bar   |
| Focus       | Not active |                      |          | Set Dry Heater   | 180 °C    |
| Scan Begin  | 100 m/z    | Set Capillary        | 4500 V   | Set Dry Gas      | 5.0 l/min |
| Scan End    | 1000 m/z   | Set End Plate Offset | -500 V   | Set Divert Valve | Source    |

### Generate Molecular Formula Parameter

|                  |                        |         |
|------------------|------------------------|---------|
| Formula, min.    |                        |         |
| Formula, max.    |                        |         |
| Measured m/z     | Tolerance              | Charge  |
| Check Valence    | Minimum                | Maximum |
| Nitrogen Rule    | Electron Configuration |         |
| Filter H/C Ratio | Minimum                | Maximum |
| Estimate Carbon  |                        |         |

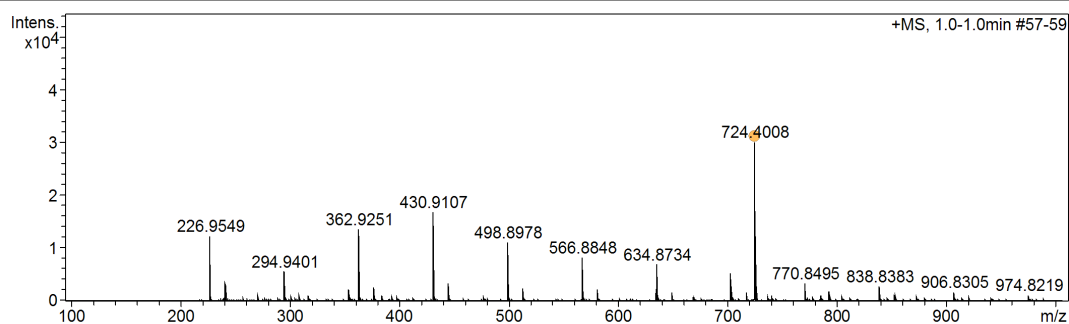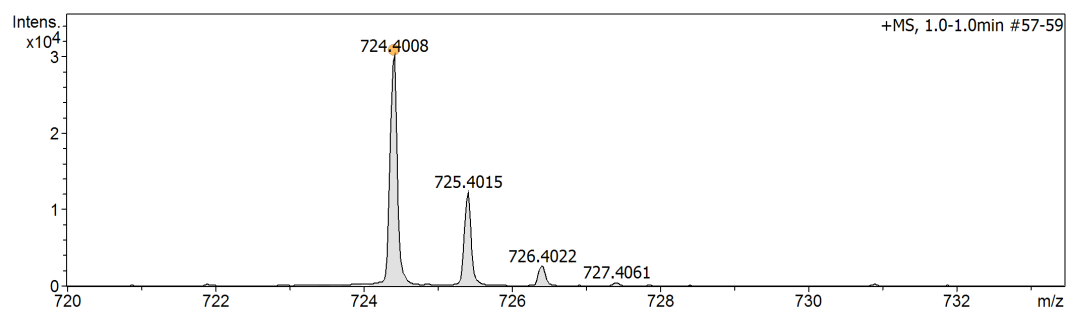

| Meas. m/z | # | Ion Formula  | m/z      | err [ppm] | mSigma | # Sigma | Score  | rdb  | e <sup>-</sup> Conf | N-Rule |
|-----------|---|--------------|----------|-----------|--------|---------|--------|------|---------------------|--------|
| 724.4008  | 1 | C35H55N7NaO8 | 724.4004 | 0.5       | 6.2    | 1       | 100.00 | 11.5 | even                | ok     |

**Figure S17.** HRMS measurement for talarolide B (2)

### 2.3. Talarolide C (3)

**Table S4.** NMR (DMSO-*d*<sub>6</sub>) data for talarolide C (3)

|                               |                   | $\delta_{\text{H}}$ , mult, ( <i>J</i> in Hz)                  | COSY                 | HMBC                               | ROESY                                                                                                                                                           |
|-------------------------------|-------------------|----------------------------------------------------------------|----------------------|------------------------------------|-----------------------------------------------------------------------------------------------------------------------------------------------------------------|
| <b>N-OH-Gly<sup>1</sup></b>   |                   |                                                                |                      |                                    |                                                                                                                                                                 |
| 1                             | 167.3             | -                                                              | -                    | -                                  | -                                                                                                                                                               |
| 2                             | 50.1              | a 4.75 <sup>b</sup><br>b 3.76, d (17.2)                        | 2b<br>2a             | 1<br>1, 1( <i>N</i> -Me-L-Tyr)     | <i>N</i> -H(L-Ala)<br><i>N</i> -OH, <i>N</i> -H(L-Ala)<br>2b, 2(D-Ala), <i>N</i> -Me( <i>N</i> -Me-L-Ala), 2( <i>N</i> -Me-L-Tyr), 5(D-Val), <i>N</i> -H(D-Val) |
| <b>L-Ala<sup>2</sup></b>      |                   |                                                                |                      |                                    |                                                                                                                                                                 |
| 1                             | 174.1             | -                                                              | -                    | -                                  | -                                                                                                                                                               |
| 2                             | 45.2              | 4.50, qd (6.7, 4.0)                                            | 3, <i>N</i> -H       | 3                                  | 3, <i>N</i> -H, <i>N</i> -Me( <i>N</i> -Me-D-Leu)                                                                                                               |
| 3                             | 15.7              | 1.20, d (6.7)                                                  | 2                    | 1, 2                               | 2, <i>N</i> -H                                                                                                                                                  |
| <i>N</i> -H                   |                   | 8.65, d (4.0)                                                  | 2                    | 2, 3, 1( <i>N</i> -OH-Gly)         | 2, 3, 2a( <i>N</i> -OH-Gly), 2b( <i>N</i> -OH-Gly)                                                                                                              |
| <b>N-Me-D-Leu<sup>3</sup></b> |                   |                                                                |                      |                                    |                                                                                                                                                                 |
| 1                             | 169.5             | -                                                              | -                    | -                                  | -                                                                                                                                                               |
| 2                             | 54.4              | 5.07, dd (11.6, 3.8)                                           | 3a, 3b               | 1, 3, <i>N</i> -Me                 | 3a, 3b, 4, 5, <i>N</i> -Me, <i>N</i> -H(D-Val)                                                                                                                  |
| 3                             | 35.9              | a 1.79, ddd (14.4, 10.3, 3.8)<br>b 1.57, ddd (14.4, 11.6, 3.9) | 2, 3b, 4<br>2, 3a, 4 | -<br>2, 5                          | 2, 5, 6<br>2, 6, <i>N</i> -Me                                                                                                                                   |
| 4                             | 24.4              | 1.38, m                                                        | 3a, 3b, 5, 6         | -                                  | 2, 6, <i>N</i> -Me                                                                                                                                              |
| 5                             | 20.9              | 0.78, d (6.5)                                                  | 4                    | 3, 4, 6                            | 2, 3a                                                                                                                                                           |
| 6                             | 23.3              | 0.89, d (6.5)                                                  | 4                    | 3, 4, 5                            | 3a, 3b, 4, <i>N</i> -Me                                                                                                                                         |
| <i>N</i> -Me                  | 31.0              | 3.01, s                                                        | -                    | 2, 1(L-Ala)                        | 2, 3b, 4, 6, 2(L-Ala), <i>N</i> -H(D-Val), 4(D-Val), 5(D-Val)                                                                                                   |
| <b>D-Val<sup>4</sup></b>      |                   |                                                                |                      |                                    |                                                                                                                                                                 |
| 1                             | 171.6             | -                                                              | -                    | -                                  | -                                                                                                                                                               |
| 2                             | 55.3              | 4.58, dd (9.5, 4.9)                                            | 3, <i>N</i> -H       | 1, 3, 4, 5, 1( <i>N</i> -Me-D-Leu) | 3, 4, <i>N</i> -H, <i>N</i> -H(D-Ala)                                                                                                                           |
| 3                             | 31.9              | 2.17, m                                                        | 2, 4, 5              | 4, 5                               | 2, 4, 5, <i>N</i> -H, <i>N</i> -H(D-Ala), <i>N</i> -OH( <i>N</i> -OH-Gly)                                                                                       |
| 4                             | 19.4              | 0.92, d (6.8)                                                  | 3                    | 2, 3, 5                            | 2, 3, <i>N</i> -H, 5/9( <i>N</i> -Me-L-Tyr)                                                                                                                     |
| 5                             | 17.0              | 0.86, d (6.8)                                                  | 3                    | 2, 3, 4                            | 3, <i>N</i> -H, <i>N</i> -OH( <i>N</i> -OH-Gly), 2( <i>N</i> -Me-L-Tyr), <i>N</i> -Me( <i>N</i> -Me-D-Leu), 5/9( <i>N</i> -Me-L-Tyr)                            |
| <i>N</i> -H                   |                   | 7.23, d (9.5)                                                  | 2                    | 1, 1( <i>N</i> -Me-D-Leu)          | 2, 3, 4, 5, 2( <i>N</i> -Me-D-Leu), <i>N</i> -Me( <i>N</i> -Me-D-Leu), <i>N</i> -OH( <i>N</i> -OH-Gly)                                                          |
| <b>D-Ala<sup>5</sup></b>      |                   |                                                                |                      |                                    |                                                                                                                                                                 |
| 1                             | 171.0             | -                                                              | -                    | -                                  | -                                                                                                                                                               |
| 2                             | 45.8              | 4.33, qd (7.1, 5.0)                                            | 3, <i>N</i> -H       | 1, 3                               | 3, <i>N</i> -H, <i>N</i> -OH( <i>N</i> -OH-Gly), <i>N</i> -Me( <i>N</i> -Me-L-Ala)                                                                              |
| 3                             | 14.9              | 1.12, d (7.1)                                                  | 2                    | 1, 2                               | 2, <i>N</i> -H, <i>N</i> -Me( <i>N</i> -Me-L-Ala)                                                                                                               |
| <i>N</i> -H                   |                   | 8.87, d (5.0)                                                  | 2                    | 2, 3, 1(D-Val)                     | 2, 3, 2(D-Val), 3(D-Val)                                                                                                                                        |
| <b>N-Me-L-Ala<sup>6</sup></b> |                   |                                                                |                      |                                    |                                                                                                                                                                 |
| 1                             | 169.8             | -                                                              | -                    | -                                  | -                                                                                                                                                               |
| 2                             | 46.7              | 4.75 <sup>b</sup>                                              | 3                    | 1, 3, NMe, 1(D-Ala)                | 3, <i>N</i> -Me, 3a( <i>N</i> -Me-L-Tyr), 5/9( <i>N</i> -Me-L-Tyr), 6/8( <i>N</i> -Me-L-Tyr)                                                                    |
| 3                             | 15.1              | 0.52, d (6.5)                                                  | 2                    | 1, 2                               | 2, <i>N</i> -Me, 5/9( <i>N</i> -Me-L-Tyr), 6/8( <i>N</i> -Me-L-Tyr)                                                                                             |
| <i>N</i> -Me                  | 28.6 <sup>a</sup> | 2.71, s                                                        | -                    | 2, 1(D-Ala)                        | 2, 3, 2(D-Ala), 3(D-Ala), <i>N</i> -OH( <i>N</i> -OH-Gly)                                                                                                       |
| <b>N-Me-L-Tyr<sup>7</sup></b> |                   |                                                                |                      |                                    |                                                                                                                                                                 |
| 1                             | 168.2             | -                                                              | -                    | -                                  | -                                                                                                                                                               |
| 2                             | 56.6              | 4.80, dd (9.8, 5.3)                                            | 3a, 3b               | 1, 3, <i>N</i> -Me                 | 3a, 3b, 5/9, <i>N</i> -OH( <i>N</i> -OH-Gly), 5(D-Val)                                                                                                          |
| 3                             | 34.3              | a 2.82, dd (14.2, 9.8)<br>b 2.62, dd (14.2, 5.3)               | 2, 3b<br>2, 3a       | 2, 4, 5/9<br>2, 4, 5/9             | 2, 5/9, 2( <i>N</i> -Me-L-Ala)<br>2, 5/9                                                                                                                        |
| 4                             | 126.7             | -                                                              | -                    | -                                  | -                                                                                                                                                               |
| 5/9                           | 130.7             | 6.94, d (8.4)                                                  | 6/8                  | 3, 7, 9/5                          | 2, 3a, 3b, 6/8, <i>N</i> -Me, 2( <i>N</i> -Me-L-Ala), 3( <i>N</i> -Me-L-Ala), 4(D-Val), 5(D-Val)                                                                |
| 6/8                           | 114.8             | 6.63, d (8.4)                                                  | 5/9                  | 4, 7, 8/6                          | 5/9, 7-OH, 2( <i>N</i> -Me-L-Ala), 3( <i>N</i> -Me-L-Ala)                                                                                                       |
| 7                             | 155.9             | -                                                              | -                    | -                                  | -                                                                                                                                                               |
| 7-OH                          |                   | 9.18, s                                                        | -                    | 6/8, 7                             | 6/8                                                                                                                                                             |
| <i>N</i> -Me                  | 28.6 <sup>a</sup> | 2.67, s                                                        | -                    | 2, 1( <i>N</i> -Me-L-Ala)          | 5/9                                                                                                                                                             |

<sup>a-b</sup> signals within the same superscripts are overlapping

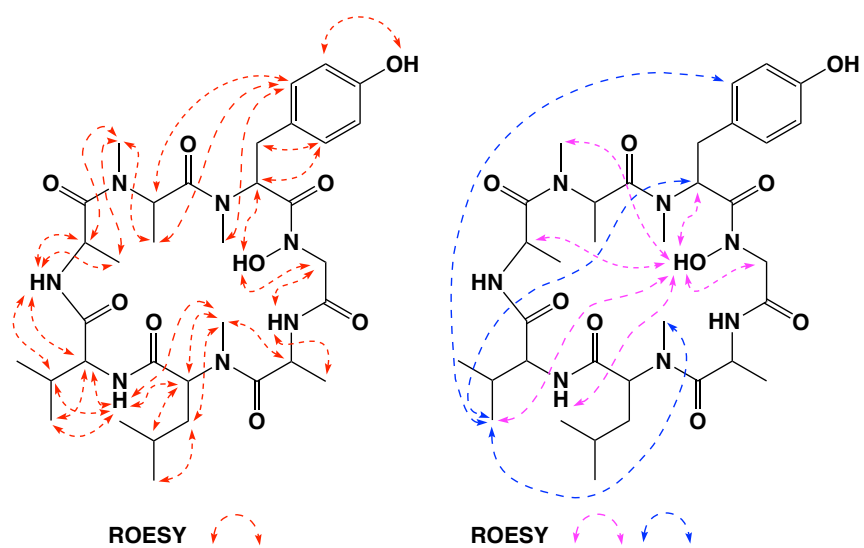

**Figure S18.** ROESY (DMSO- $d_6$ ) correlations for talarolide C (**3**)

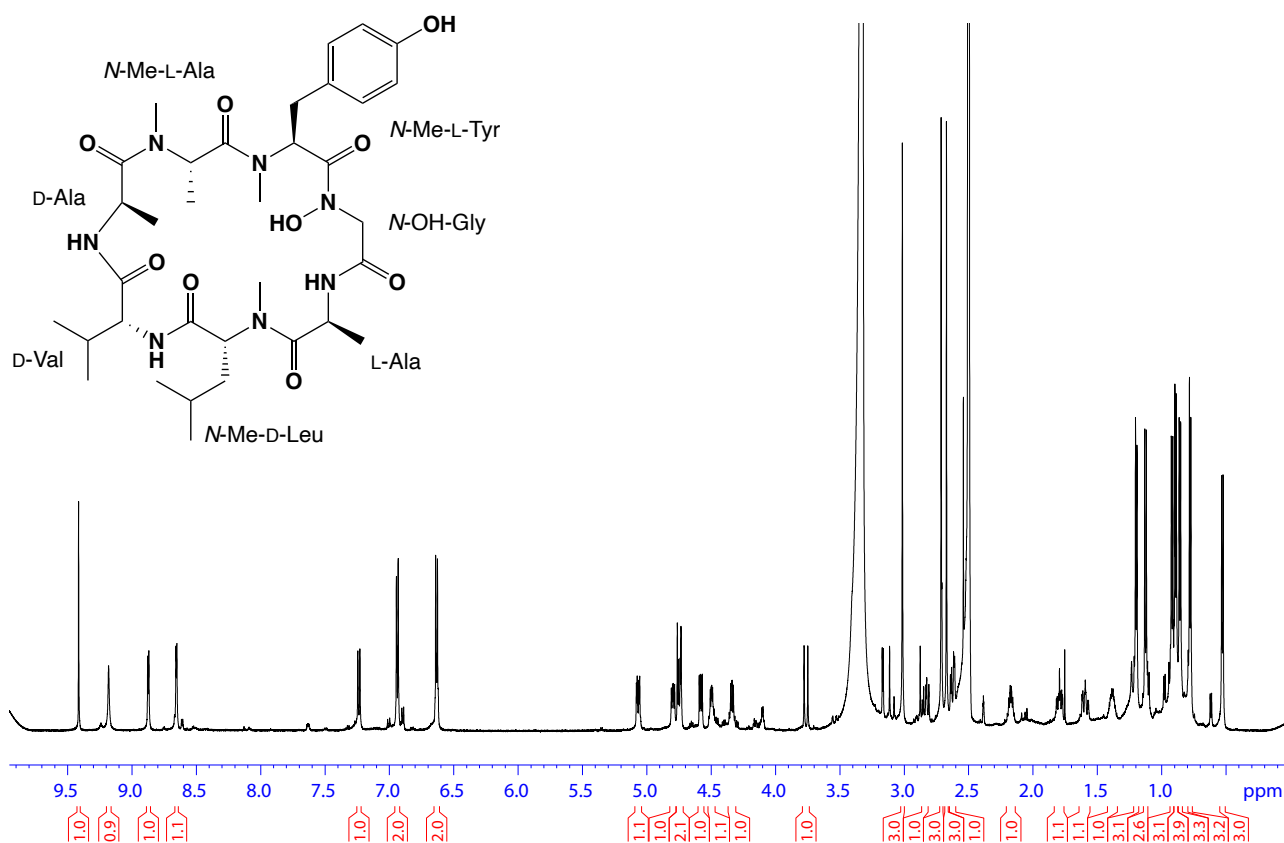

**Figure S19.**  $^1\text{H}$  NMR (600 MHz,  $\text{DMSO}-d_6$ ) spectrum of talarolide C (**3**)

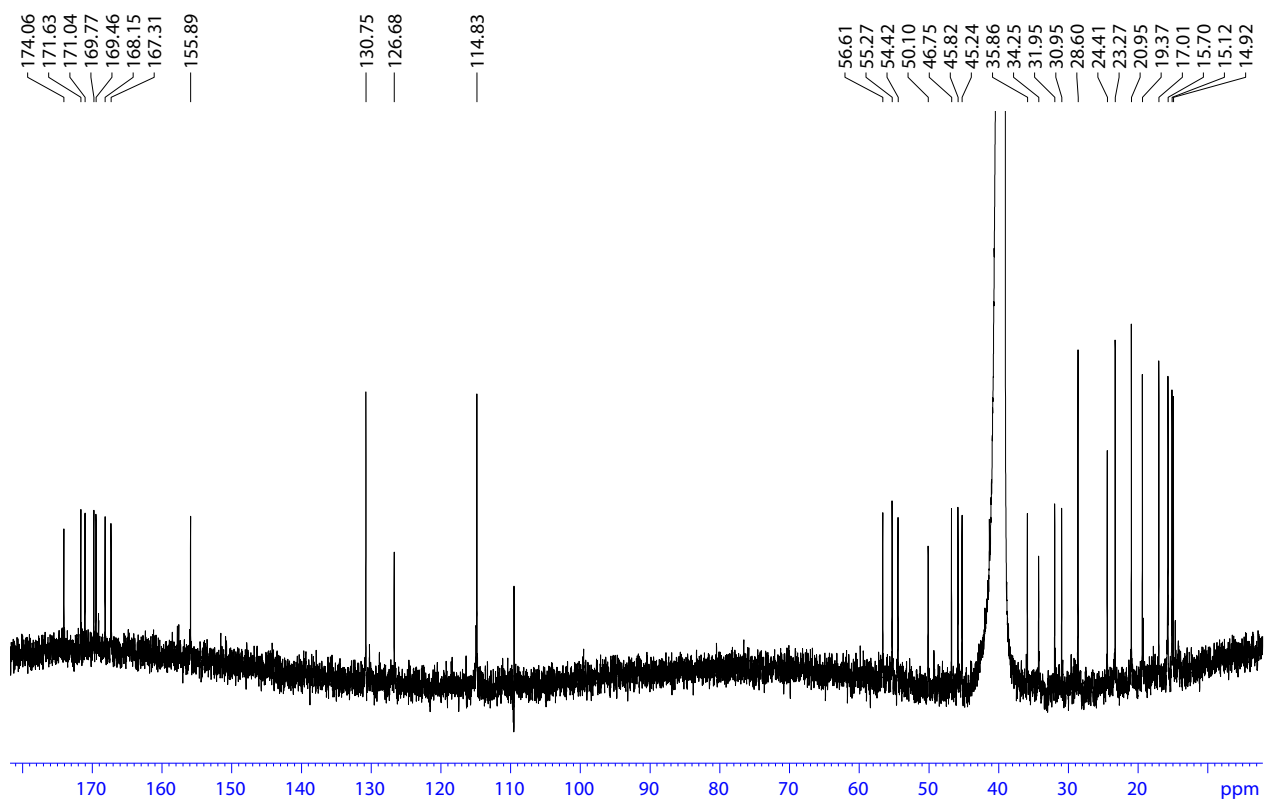

**Figure S20.**  $^{13}\text{C}$  NMR (150 MHz,  $\text{DMSO}-d_6$ ) spectrum of talarolide C (**3**)

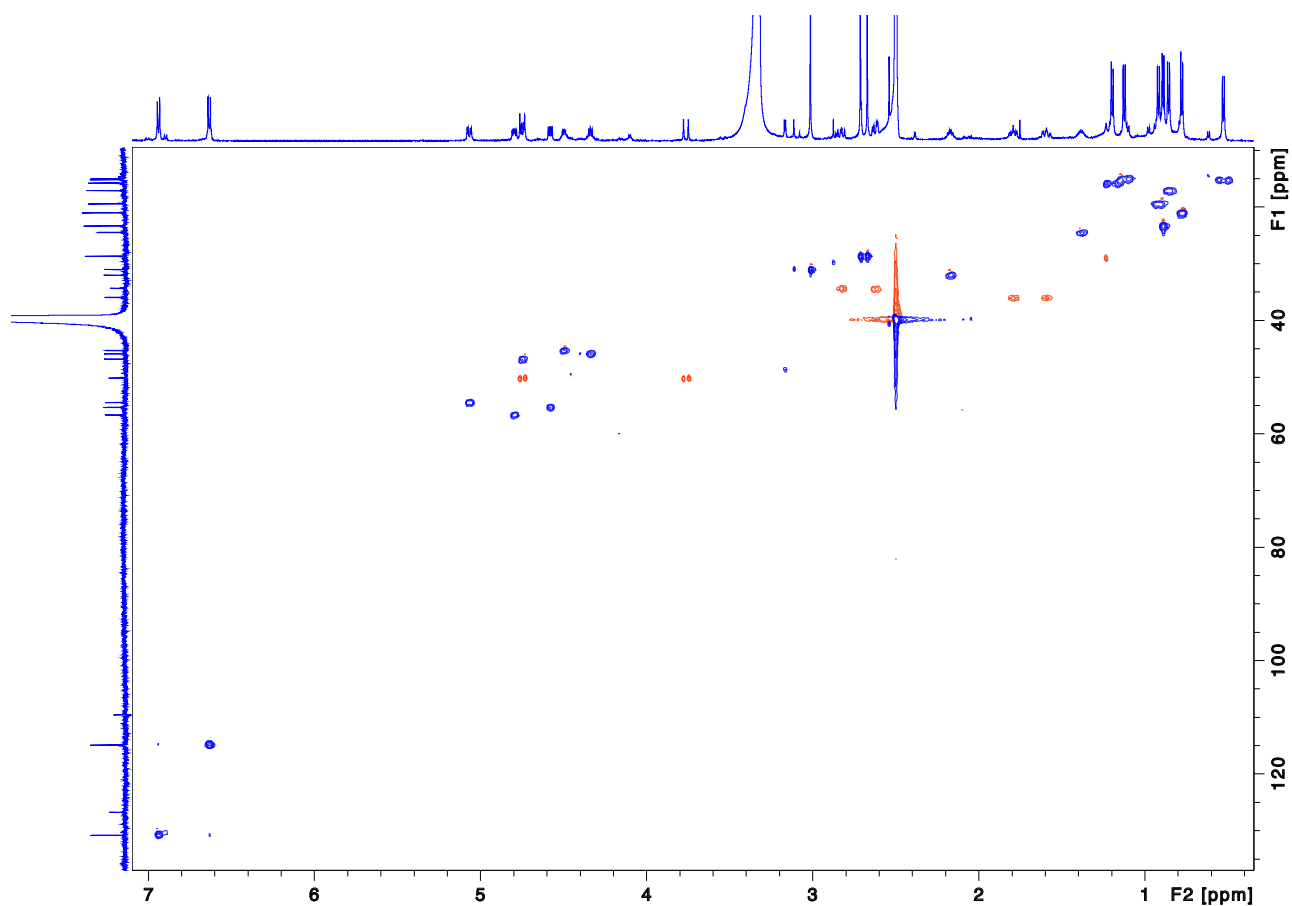

**Figure S21.** HSQC (600 MHz, DMSO- $d_6$ ) spectrum of talarolide C (**3**)

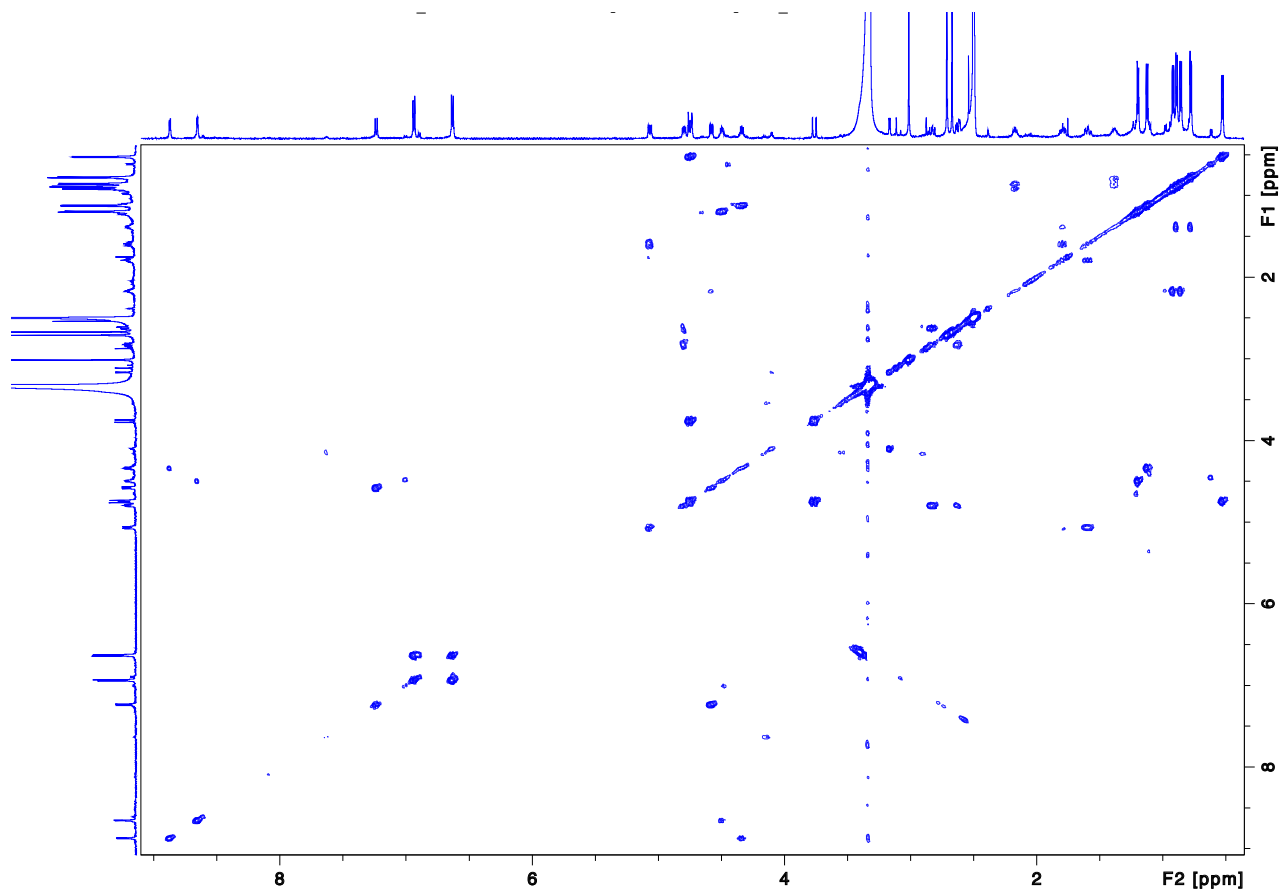

**Figure S22.** COSY (600 MHz, DMSO- $d_6$ ) spectrum of talarolide C (**3**)

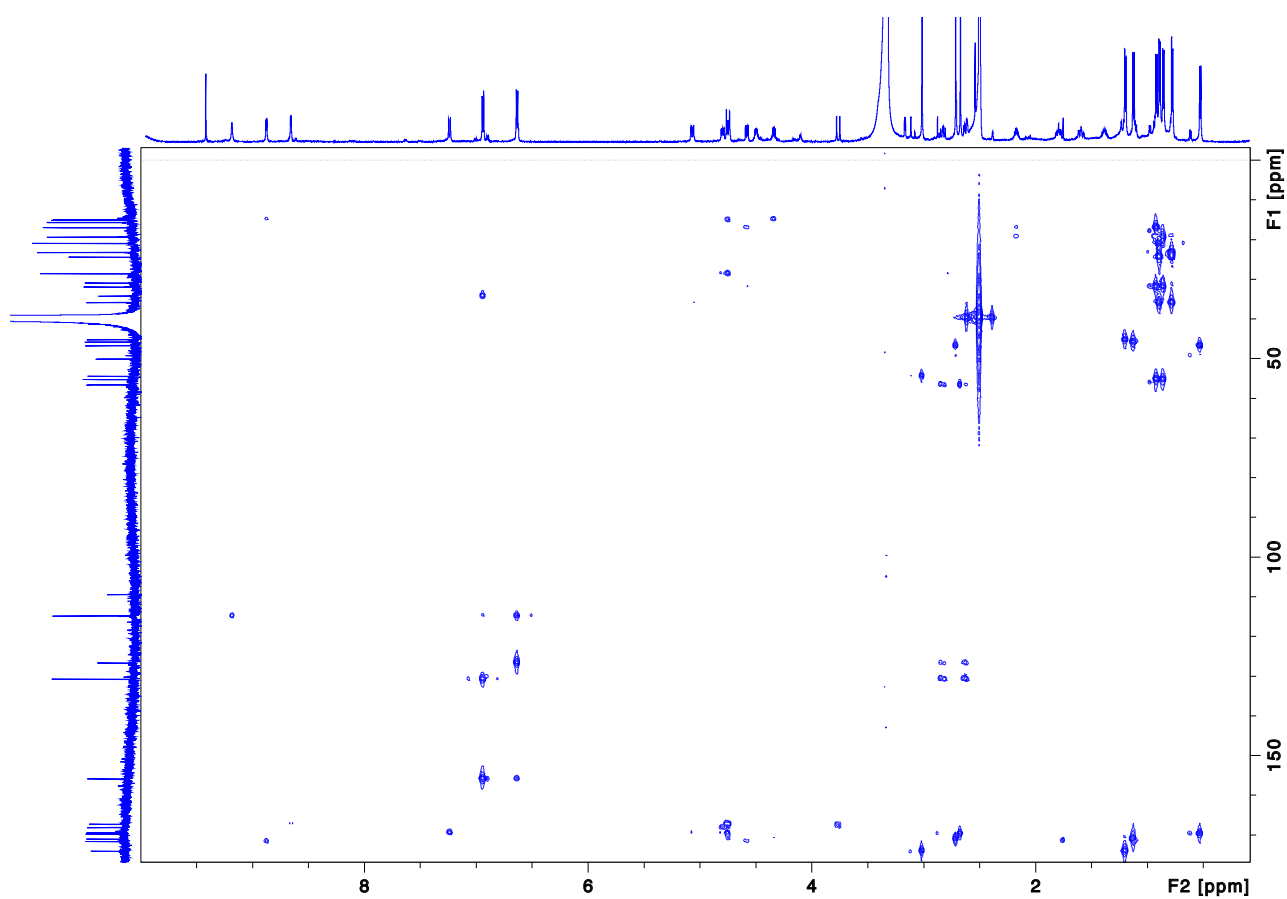

**Figure S23.** HMBC (600 MHz, DMSO- $d_6$ ) spectrum of talarolide C (**3**)

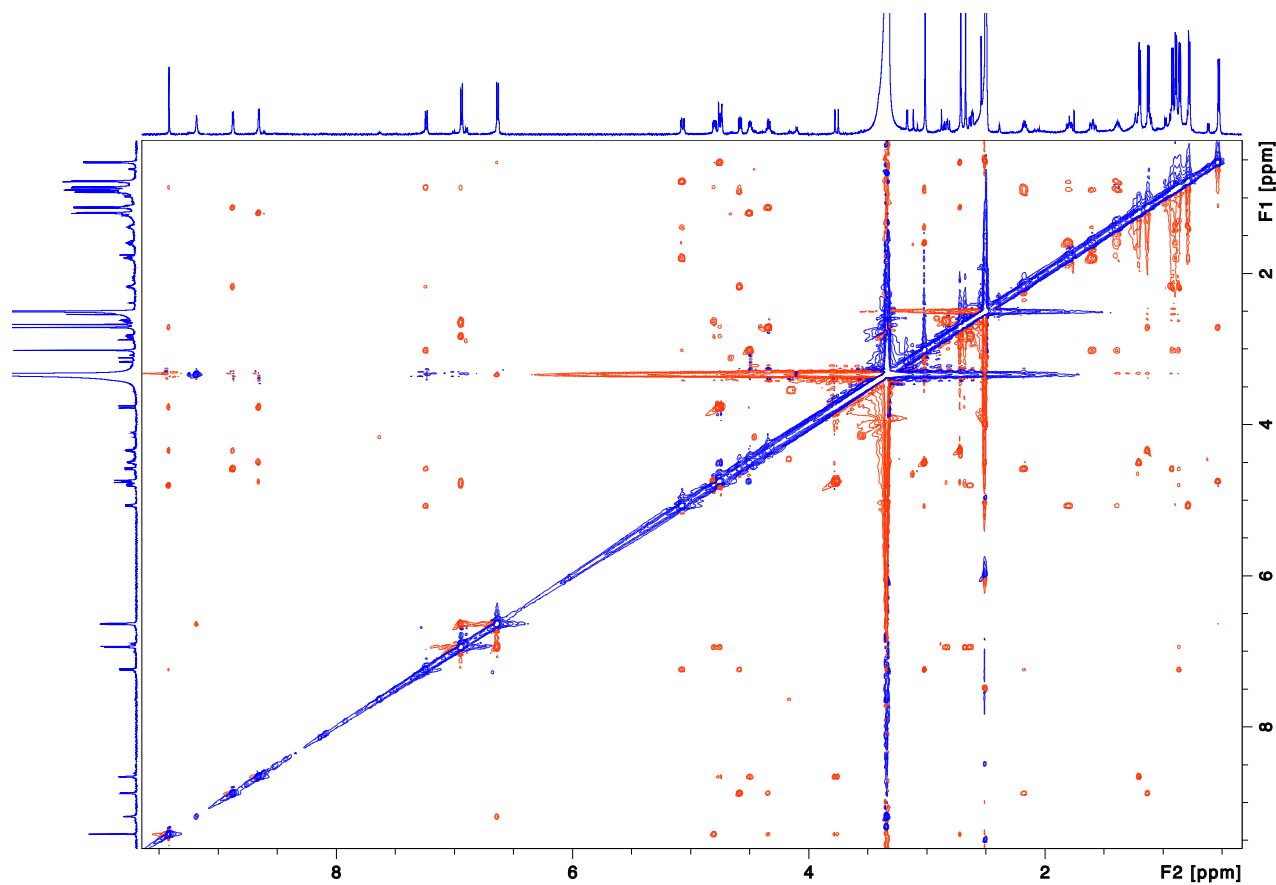

**Figure S24.** ROESY (600 MHz, DMSO- $d_6$ ) spectrum of talarolide C (**3**)

# Mass Spectrum Molecular Formula Report

## Analysis Info

Analysis Name D:\Data\A.salim\Talarolide C.d  
Method tune-med\_AP.m  
Sample Name  
Comment

Acquisition Date 10/21/2022 12:54:25 PM

Operator a.salim  
Instrument / Ser# micrOTOF 213750.00  
232

## Acquisition Parameter

|             |            |                      |          |                  |           |
|-------------|------------|----------------------|----------|------------------|-----------|
| Source Type | ESI        | Ion Polarity         | Positive | Set Nebulizer    | 0.8 Bar   |
| Focus       | Not active |                      |          | Set Dry Heater   | 180 °C    |
| Scan Begin  | 100 m/z    | Set Capillary        | 4500 V   | Set Dry Gas      | 5.0 l/min |
| Scan End    | 1000 m/z   | Set End Plate Offset | -500 V   | Set Divert Valve | Source    |

## Generate Molecular Formula Parameter

|                  |                        |         |
|------------------|------------------------|---------|
| Formula, min.    |                        |         |
| Formula, max.    |                        |         |
| Measured m/z     | Tolerance              | Charge  |
| Check Valence    | Minimum                | Maximum |
| Nitrogen Rule    | Electron Configuration |         |
| Filter H/C Ratio | Minimum                | Maximum |
| Estimate Carbon  |                        |         |

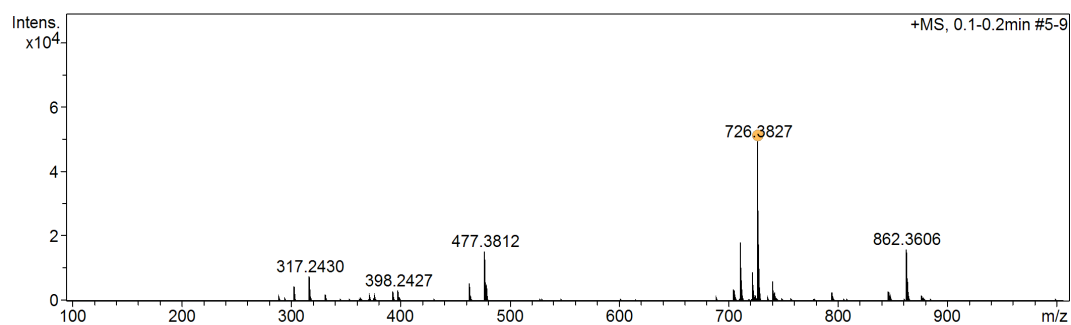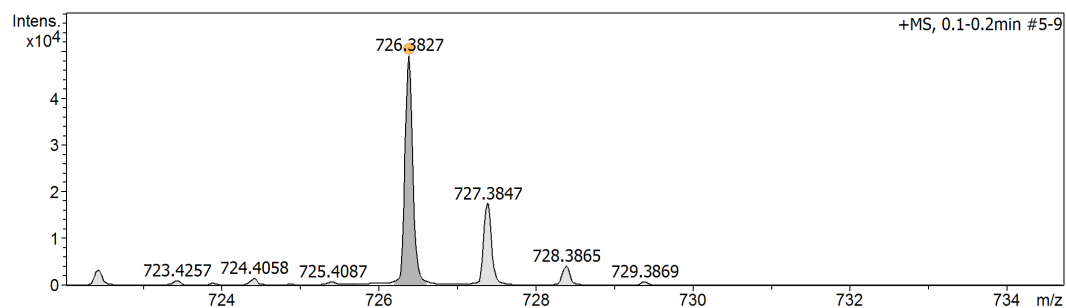

| Meas. m/z | # | Ion Formula                                                     | m/z      | err [ppm] | mSigma | # Sigma | Score | rdb  | e <sup>-</sup> Conf | N-Rule |
|-----------|---|-----------------------------------------------------------------|----------|-----------|--------|---------|-------|------|---------------------|--------|
| 726.3827  | 1 | C <sub>34</sub> H <sub>53</sub> N <sub>7</sub> NaO <sub>9</sub> | 726.3797 | 4.2       | 24.9   | 2       | 66.03 | 11.5 | even                | ok     |

Figure S25. HRMS measurement for talarolide C (3)

## 2.4. Talarolide D (4)

**Table S5.** NMR (DMSO-*d*<sub>6</sub>) data for talarolide D (4)

|                                      | $\delta_{\text{H}}$ , mult, ( <i>J</i> in Hz)                       | COSY                 | HMBC                                          | ROESY                                                                                                                                          |
|--------------------------------------|---------------------------------------------------------------------|----------------------|-----------------------------------------------|------------------------------------------------------------------------------------------------------------------------------------------------|
| <b>N-OH-Gly<sup>1</sup></b>          |                                                                     |                      |                                               |                                                                                                                                                |
| 1                                    | 167.5 -                                                             | -                    | -                                             | -                                                                                                                                              |
| 2                                    | 49.9 a 4.80 d (17.0)<br>b 3.71, d (17.0)                            | 2b<br>2a             | 1<br>1                                        | <i>N</i> -H-(L-Ala <sup>2</sup> )<br><i>N</i> -OH, <i>N</i> -H-(L-Ala <sup>2</sup> )                                                           |
| <i>N</i> -OH                         | 9.13, s                                                             | -                    | 1( <i>N</i> -Me-L-Tyr)                        | 2b, 2(D-Ala), 2( <i>N</i> -Me-L-Tyr), <i>N</i> -H(D- <i>allo</i> -Ile), 6(D- <i>allo</i> -Ile)                                                 |
| <b>L-Ala<sup>2</sup></b>             |                                                                     |                      |                                               |                                                                                                                                                |
| 1                                    | 174.0 -                                                             | -                    | -                                             | -                                                                                                                                              |
| 2                                    | 45.2 4.49, qd (6.8, 4.1)                                            | 3, <i>N</i> -H       | 3                                             | 3, <i>N</i> -H, <i>N</i> -Me( <i>N</i> -Me-D-Leu)                                                                                              |
| 3                                    | 15.7 1.19, d (6.8)                                                  | 2                    | 1, 2                                          | 2, <i>N</i> -H                                                                                                                                 |
| <i>N</i> -H                          | 8.62, d (4.1)                                                       | 2                    | 3, 1( <i>N</i> -OH-Gly)                       | 2, 3, 2a( <i>N</i> -OH-Gly), 2b( <i>N</i> -OH-Gly)                                                                                             |
| <b><i>N</i>-Me-D-Leu<sup>3</sup></b> |                                                                     |                      |                                               |                                                                                                                                                |
| 1                                    | 169.5 -                                                             | -                    | -                                             | -                                                                                                                                              |
| 2                                    | 54.4 5.06, dd (11.7, 3.8)                                           | 3a, 3b               | 1, 3, <i>N</i> -Me                            | 3a, 4, 5, <i>N</i> -Me, <i>N</i> -H(D- <i>allo</i> -Ile)                                                                                       |
| 3                                    | 36.0 a 1.79, ddd (13.4, 10.6, 3.9)<br>b 1.57, ddd (13.4, 11.7, 3.9) | 2, 3b, 4<br>2, 3a, 4 | -<br>-                                        | 2, 5, 6<br><i>N</i> -Me                                                                                                                        |
| 4                                    | 24.4 1.38 <sup>a</sup>                                              | 3a, 3b, 5, 6         | -                                             | 2, 5, 6, <i>N</i> -Me                                                                                                                          |
| 5                                    | 20.9 0.77, d (6.5)                                                  | 4                    | 3, 4, 6                                       | 2, 3a, 4                                                                                                                                       |
| 6                                    | 23.3 0.88, d (6.6)                                                  | 4                    | 3, 4, 5                                       | 4                                                                                                                                              |
| <i>N</i> -Me                         | 30.9 2.98, s                                                        | -                    | 2, 1(L-Ala <sup>1</sup> )                     | 2, 3b, 4, 2(L-Ala <sup>2</sup> ), <i>N</i> -H(D- <i>allo</i> -Ile), 6(D- <i>allo</i> -Ile)                                                     |
| <b>D-<i>allo</i>-Ile<sup>4</sup></b> |                                                                     |                      |                                               |                                                                                                                                                |
| 1                                    | 171.8 -                                                             | -                    | -                                             | -                                                                                                                                              |
| 2                                    | 53.8 4.69, dd (9.5, 3.9)                                            | 3, <i>N</i> -H       | 1, 3, 6                                       | 3, 4a, 5, 6, <i>N</i> -H, <i>N</i> -H(D-Ala)                                                                                                   |
| 3                                    | 38.8 1.91, m                                                        | 2, 4a, 4b, 6         | -                                             | 2, 5, <i>N</i> -H, <i>N</i> -H(D-Ala)                                                                                                          |
| 4                                    | 26.4 a 1.39 <sup>a</sup><br>b 1.05, m                               | 3, 4b, 5<br>3, 4a, 5 | 2, 3, 5, 6<br>2, 3, 5, 6                      | 2, 6, <i>N</i> -H<br>6, <i>N</i> -H, <i>N</i> -Me( <i>N</i> -Me-D-Leu)                                                                         |
| 5                                    | 11.9 0.92, dd (7.3, 7.3)                                            | 4a, 4b               | 3, 4                                          | 2, 3, 5/9( <i>N</i> -Me-L-Tyr)                                                                                                                 |
| 6                                    | 13.7 0.80, d (6.9)                                                  | 3                    | 2, 3, 4                                       | 2, 4a, 4b, <i>N</i> -H, <i>N</i> -Me( <i>N</i> -Me-D-Leu), 5/9( <i>N</i> -Me-L-Tyr), 6/8( <i>N</i> -Me-L-Tyr), <i>N</i> -OH( <i>N</i> -OH-Gly) |
| <i>N</i> -H                          | 7.14, d (9.6)                                                       | 2                    | 1( <i>N</i> -Me-D-Leu)                        | 2, 3, 4a, 4b, 6, 2( <i>N</i> -Me-D-Leu), <i>N</i> -Me( <i>N</i> -Me-D-Leu), <i>N</i> -OH( <i>N</i> -OH-Gly), 2(L-Ala <sup>1</sup> )            |
| <b>D-Ala<sup>5</sup></b>             |                                                                     |                      |                                               |                                                                                                                                                |
| 1                                    | 170.8 -                                                             | -                    | -                                             | -                                                                                                                                              |
| 2                                    | 48.6 3.90, m                                                        | 3, <i>N</i> -H       | 1, 3                                          | 3, <i>N</i> -H, <i>N</i> -H(L-Ala <sup>6</sup> ), <i>N</i> -OH( <i>N</i> -OH-Gly)                                                              |
| 3                                    | 16.7 1.13, d (7.1)                                                  | 2                    | 1, 2                                          | 2, <i>N</i> -H, <i>N</i> -H(L-Ala <sup>6</sup> )                                                                                               |
| <i>N</i> -H                          | 8.58, d (5.2)                                                       | 2                    | 3, 1(D- <i>allo</i> -Ile)                     | 2, 3, 2(D- <i>allo</i> -Ile), 3(D- <i>allo</i> -Ile)                                                                                           |
| <b>L-Ala<sup>6</sup></b>             |                                                                     |                      |                                               |                                                                                                                                                |
| 1                                    | 171.4 -                                                             | -                    | -                                             | -                                                                                                                                              |
| 2                                    | 42.7 4.37, m                                                        | 3, <i>N</i> -H       | 3                                             | 3, <i>N</i> -H, 2( <i>N</i> -Me-L-Tyr), 5/9( <i>N</i> -Me-L-Tyr)                                                                               |
| 3                                    | 18.5 0.63, d (6.4)                                                  | 2                    | 1, 2                                          | 2, <i>N</i> -H, 5/9( <i>N</i> -Me-L-Tyr), 6/8( <i>N</i> -Me-L-Tyr)                                                                             |
| <i>N</i> -H                          | 8.27, d (9.5)                                                       | 2                    | 3, 1(D-Ala)                                   | 2, 3, 2(D-Ala), 3(D-Ala)                                                                                                                       |
| <b><i>N</i>-Me-L-Tyr<sup>7</sup></b> |                                                                     |                      |                                               |                                                                                                                                                |
| 1                                    | 168.3 -                                                             | -                    | -                                             | -                                                                                                                                              |
| 2                                    | 57.1 5.01, dd (8.6, 6.6)                                            | 3a, 3b               | 1, 3, 4, <i>N</i> -Me, 1(L-Ala <sup>6</sup> ) | 5/9, <i>N</i> -OH( <i>N</i> -OH-Gly), 2(L-Ala <sup>6</sup> ), 6(D- <i>allo</i> -Ile)                                                           |
| 3                                    | 34.5 a 2.81, dd (14.3, 6.6)<br>b 2.77, dd (14.3, 8.6)               | 2, 3b<br>2, 3a       | 1, 2, 4, 5/9<br>1, 2, 4, 5/9                  | 5/9<br>5/9                                                                                                                                     |
| 4                                    | 127.2 -                                                             | -                    | -                                             | -                                                                                                                                              |
| 5/9                                  | 130.6 6.99, d (8.4)                                                 | 6, 8                 | 3, 7, 6/8, 9/5                                | 2, 3a, 3b, 6/8, <i>N</i> -Me, 2(L-Ala <sup>6</sup> ), 3(L-Ala <sup>6</sup> ), 5(D- <i>allo</i> -Ile), 6(D- <i>allo</i> -Ile)                   |
| 6/8                                  | 114.9 6.63, d (8.4)                                                 | 5, 9                 | 4, 7, 8/6                                     | 5/9, 7-OH, 3(L-Ala <sup>6</sup> ), 6(D- <i>allo</i> -Ile)                                                                                      |
| 7                                    | 155.8 -                                                             | -                    | -                                             | -                                                                                                                                              |
| 7-OH                                 | 9.15, s                                                             | -                    | 6/8, 7                                        | 6/8                                                                                                                                            |
| <i>N</i> -Me                         | 28.6 2.64, s                                                        | -                    | 2, 1(L-Ala <sup>6</sup> )                     | 5/9                                                                                                                                            |

<sup>a</sup> signals are overlapping

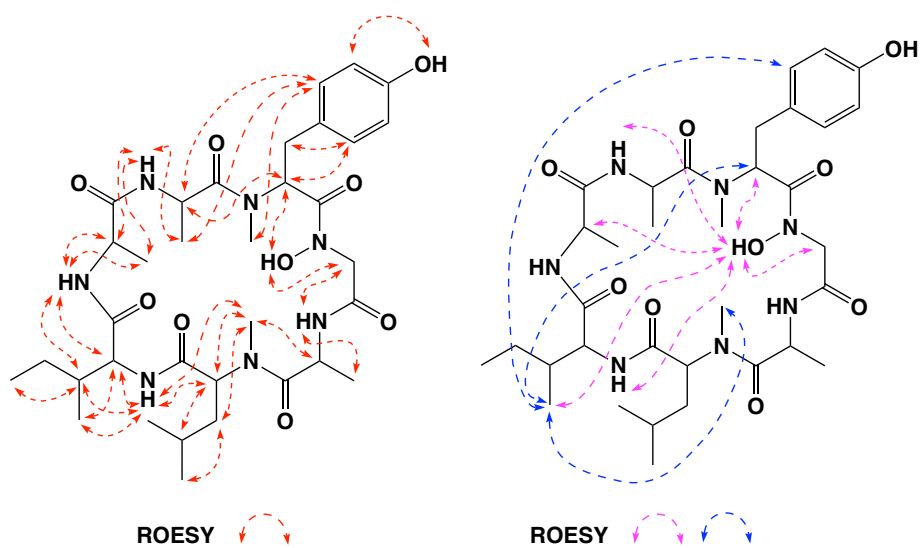

**Figure S26.** ROESY (DMSO- $d_6$ ) correlations for talarolide D (4)

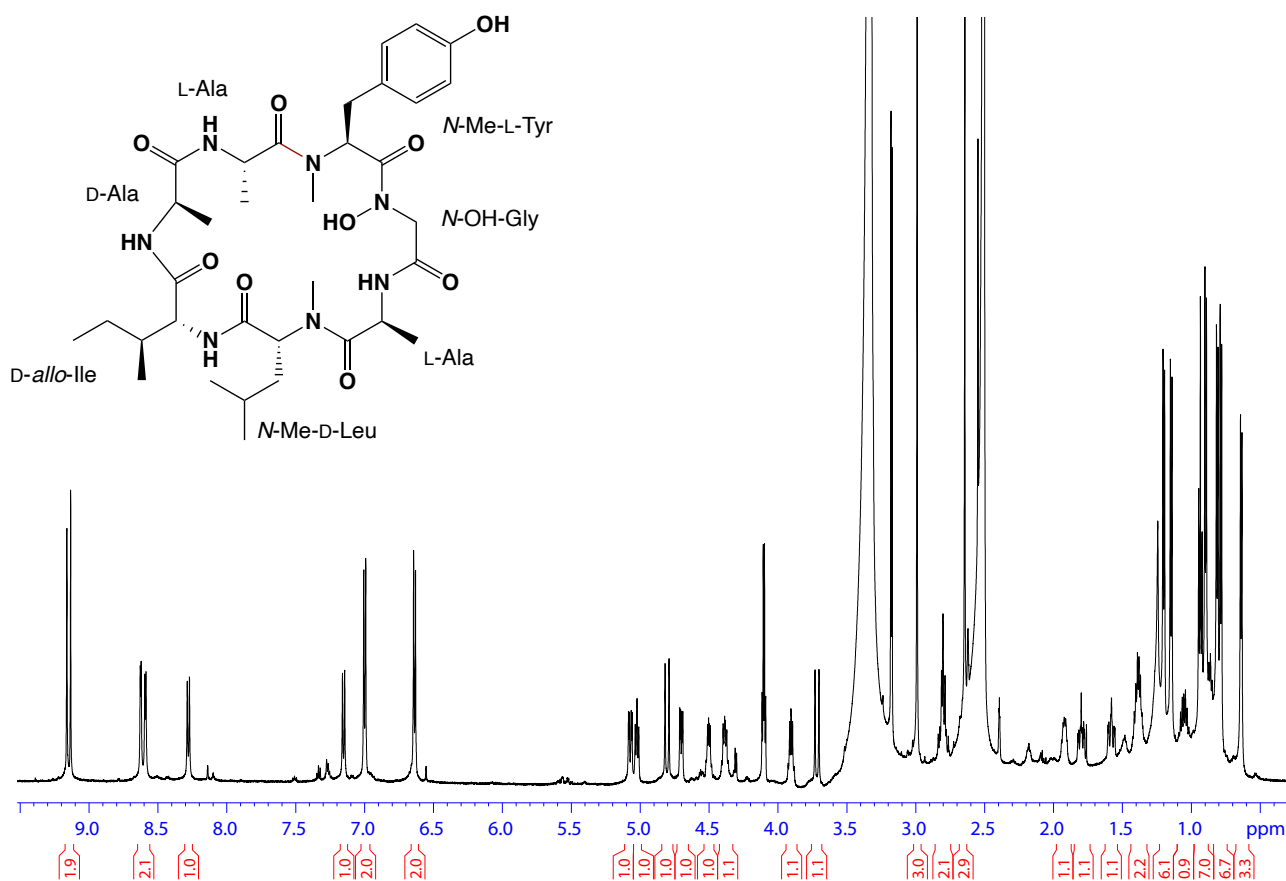

**Figure S27.**  $^1\text{H}$  NMR (600 MHz,  $\text{DMSO}-d_6$ ) spectrum of talarolide D (4)

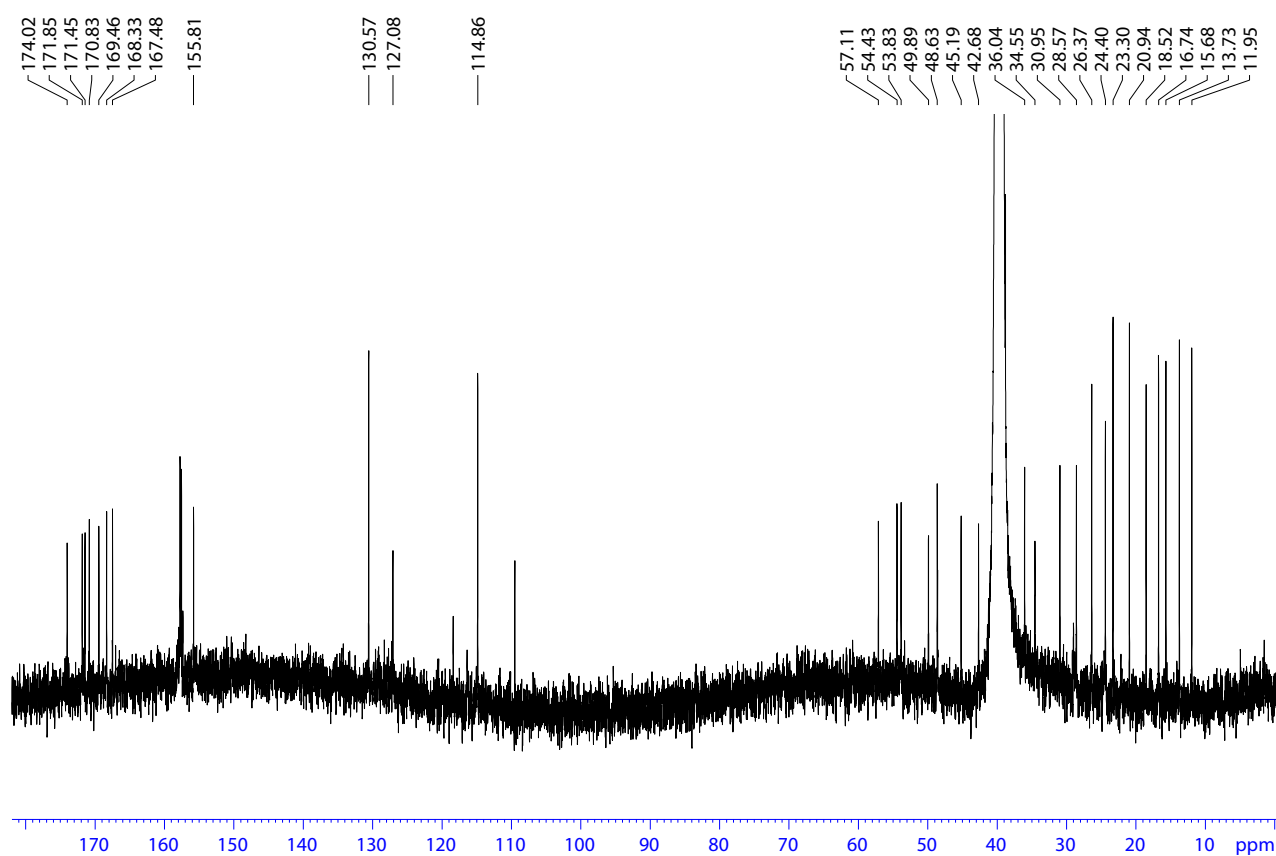

**Figure S28.**  $^{13}\text{C}$  NMR (150 MHz,  $\text{DMSO}-d_6$ ) spectrum of talarolide D (4)

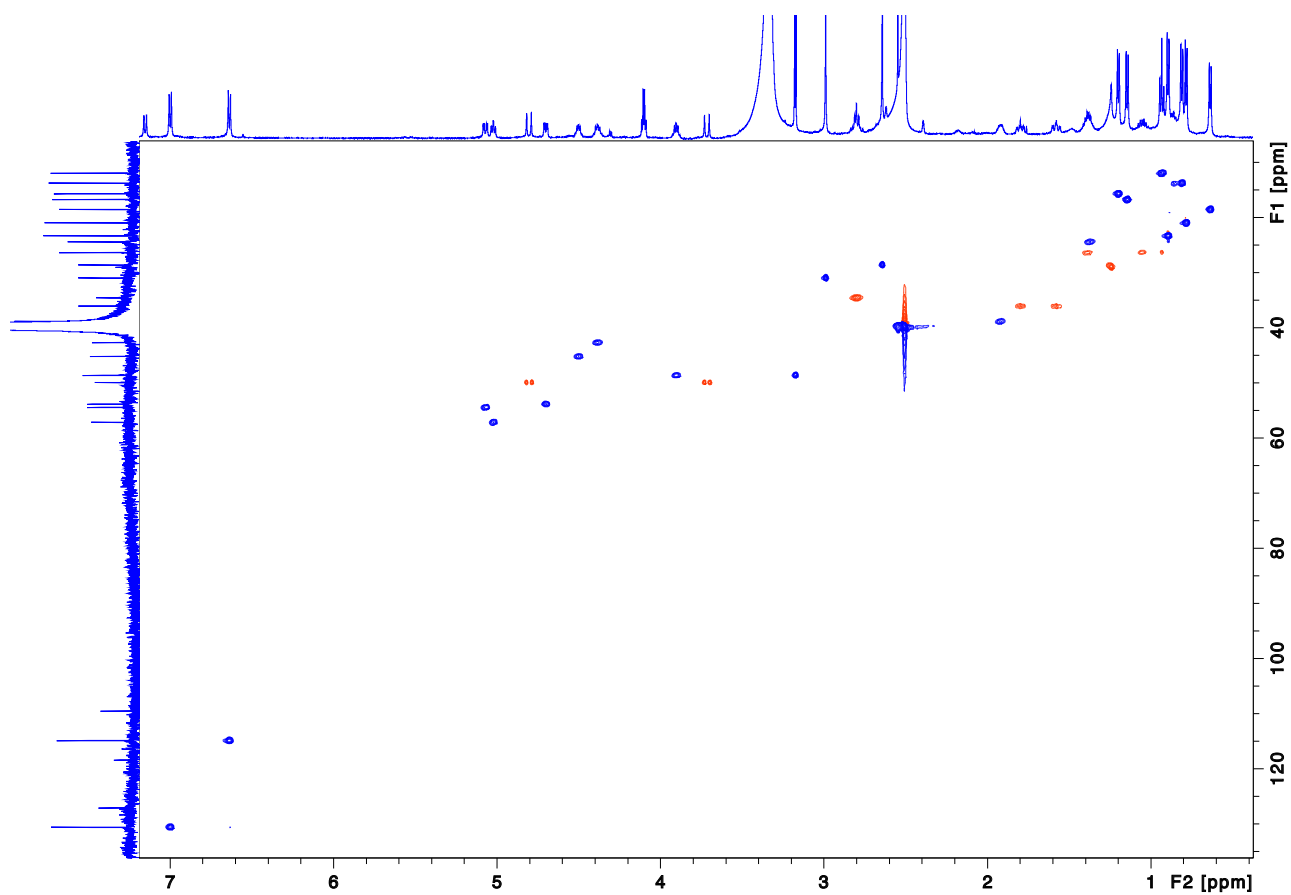

**Figure S29.** HSQC (600 MHz, DMSO- $d_6$ ) spectrum of talarolide D (4)

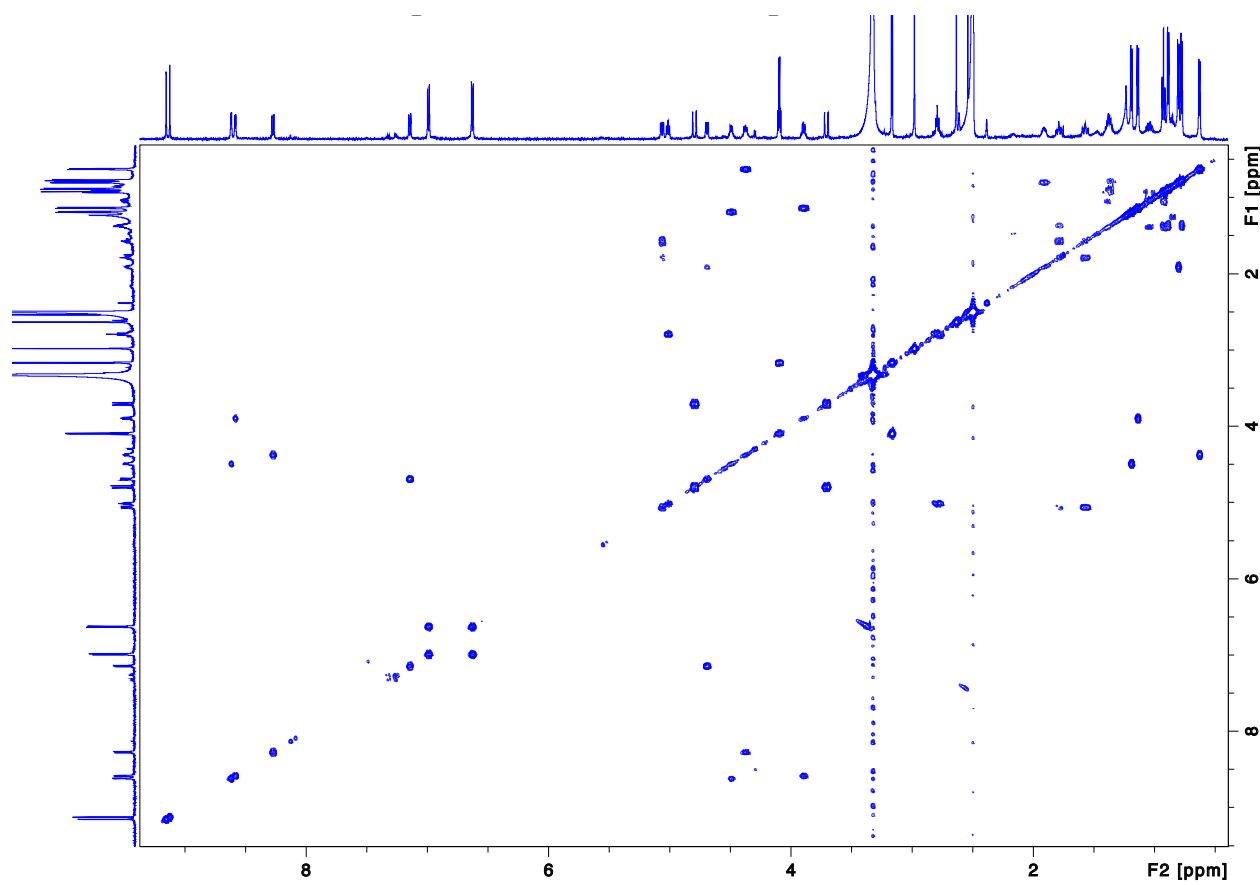

**Figure S30.** COSY (600 MHz, DMSO- $d_6$ ) spectrum of talarolide D (4)

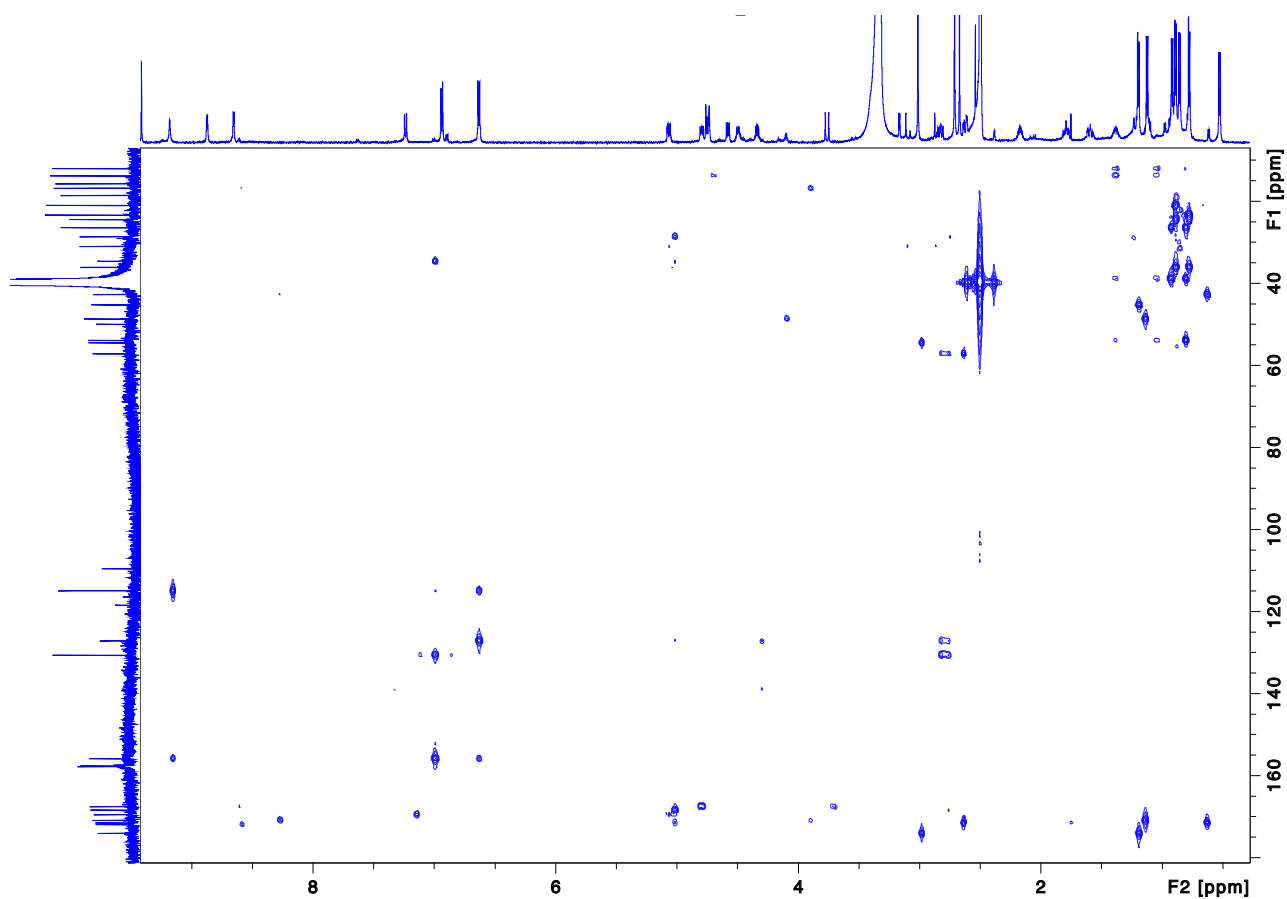

**Figure S31.** HMBC (600 MHz, DMSO-*d*<sub>6</sub>) spectrum of talarolide D (**4**)

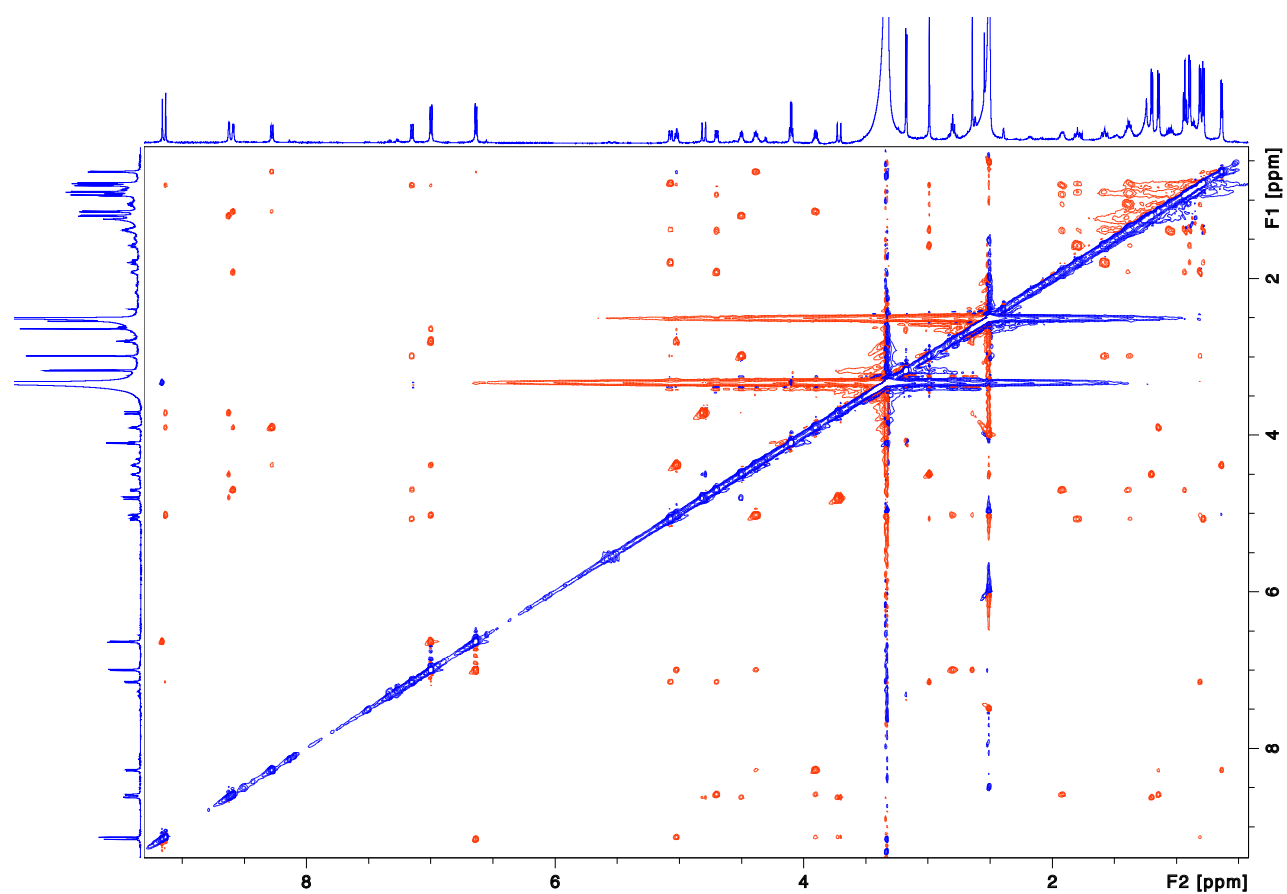

**Figure S32.** ROESY (600 MHz, DMSO-*d*<sub>6</sub>) spectrum of talarolide D (**4**)

## Mass Spectrum Molecular Formula Report

### Analysis Info

Analysis Name D:\Data\A.salim\Talarolide D.d  
 Method tune-med\_AP.m  
 Sample Name  
 Comment

Acquisition Date 10/21/2022 1:24:48 PM  
 Operator a.salim  
 Instrument / Ser# microTOF 213750.00  
 232

### Acquisition Parameter

|             |            |                      |          |                  |           |
|-------------|------------|----------------------|----------|------------------|-----------|
| Source Type | ESI        | Ion Polarity         | Positive | Set Nebulizer    | 0.8 Bar   |
| Focus       | Not active |                      |          | Set Dry Heater   | 180 °C    |
| Scan Begin  | 100 m/z    | Set Capillary        | 4500 V   | Set Dry Gas      | 5.0 l/min |
| Scan End    | 1000 m/z   | Set End Plate Offset | -500 V   | Set Divert Valve | Source    |

### Generate Molecular Formula Parameter

|                  |                        |         |
|------------------|------------------------|---------|
| Formula, min.    |                        |         |
| Formula, max.    |                        |         |
| Measured m/z     | Tolerance              | Charge  |
| Check Valence    | Minimum                | Maximum |
| Nitrogen Rule    | Electron Configuration |         |
| Filter H/C Ratio | Minimum                | Maximum |
| Estimate Carbon  |                        |         |

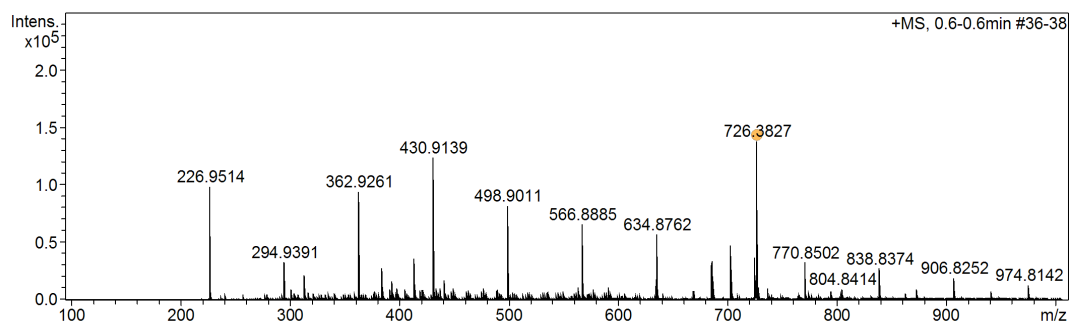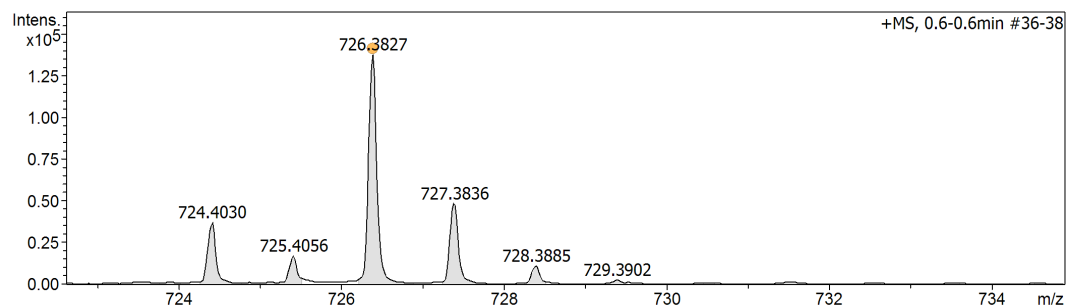

| Meas. m/z | # | Ion Formula  | m/z      | err [ppm] | mSigma | # Sigma | Score | rdb  | e <sup>-</sup> Conf | N-Rule |
|-----------|---|--------------|----------|-----------|--------|---------|-------|------|---------------------|--------|
| 726.3827  | 1 | C34H53N7NaO9 | 726.3797 | -4.2      | 27.6   | 2       | 57.26 | 11.5 | even                | ok     |

**Figure S33.** HRMS measurement for talarolide D (4)

### 3. Marfey's analysis of talarolides A-D

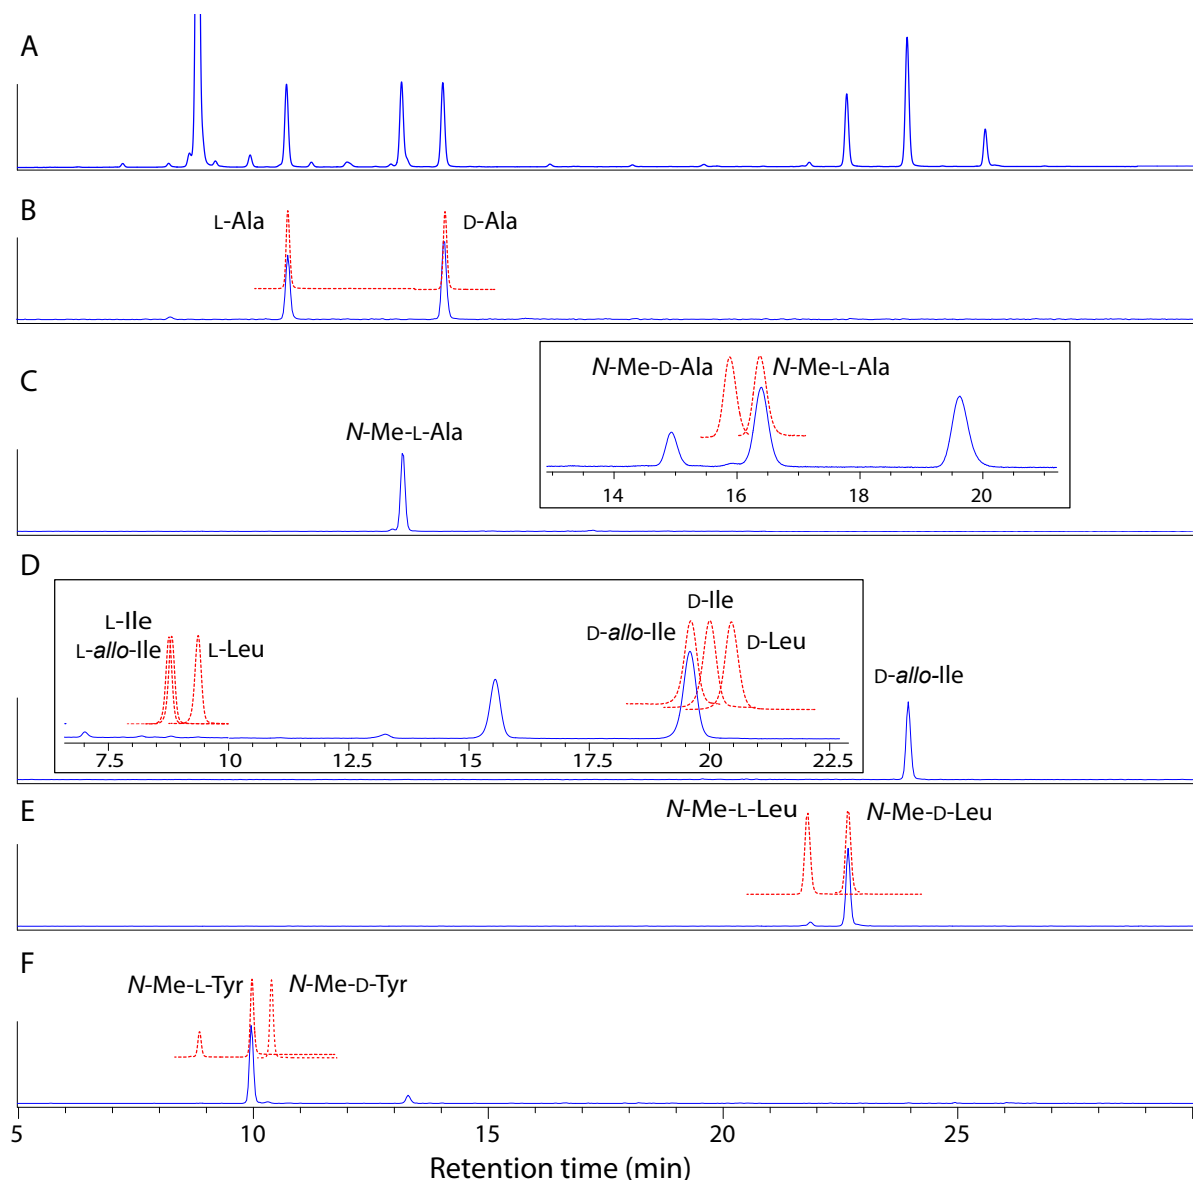

**Figure S34.** Marfey's analysis of talarolide A (**1**). (A) HPLC-DAD (340 nm) chromatogram showing L-FDAA amino acid derivatives of the acid hydrolysate **1**. (B-F) HPLC-MS(+)-SIE (single ion extraction) chromatograms for L-FDAA derivatives of authentic amino acid standards (red traces) and the acid hydrolysate of **1** (blue traces). The insets in (C) and (D) showed the UPLC-DAD (340 nm) chromatograms. Traces confirm that **1** incorporates (B) L-Ala and D-Ala (SIE  $m/z$  342), (C) *N*-Me-L-Ala (SIE  $m/z$  356), (D) *D*-allo-Ile (SIE  $m/z$  384), (E) *N*-Me-D-Leu (SIE  $m/z$  398), and (F) *N*-Me-L-Tyr (SIE  $m/z$  448).

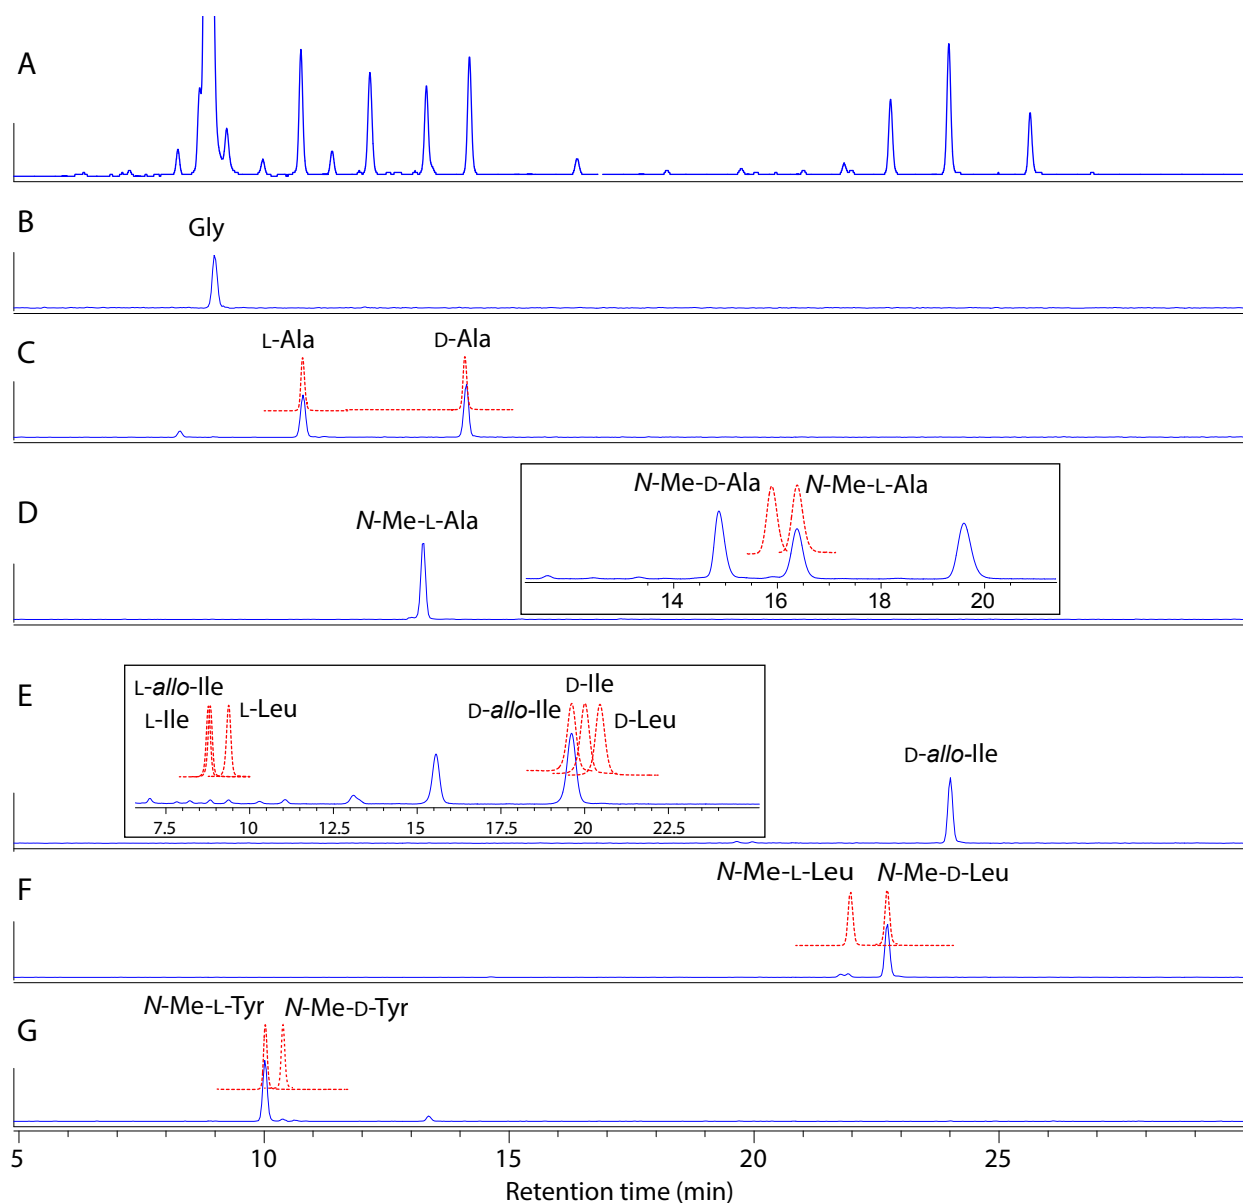

**Figure S35.** Marfeys analysis of talarolide B (**2**). (A) HPLC-DAD (340 nm) chromatogram showing L-FDAA amino acid derivatives of the acid hydrolysate **2**. (B-G) HPLC-MS(+)-SIE (single ion extraction) chromatograms for L-FDAA derivatives of authentic amino acid standards (red traces) and the acid hydrolysate of **2** (blue traces). The insets in (D) and (E) showed the UPLC-DAD (340 nm) chromatograms. Traces confirm that **2** incorporates (B) Gly (SIE  $m/z$  328), (C) L-Ala and D-Ala (SIE  $m/z$  342), (D) *N*-Me-L-Ala (SIE  $m/z$  356), (E) D-*allo*-Ile (SIE  $m/z$  384), (F) *N*-Me-D-Leu (SIE  $m/z$  398), and (G) *N*-Me-L-Tyr (SIE  $m/z$  448).

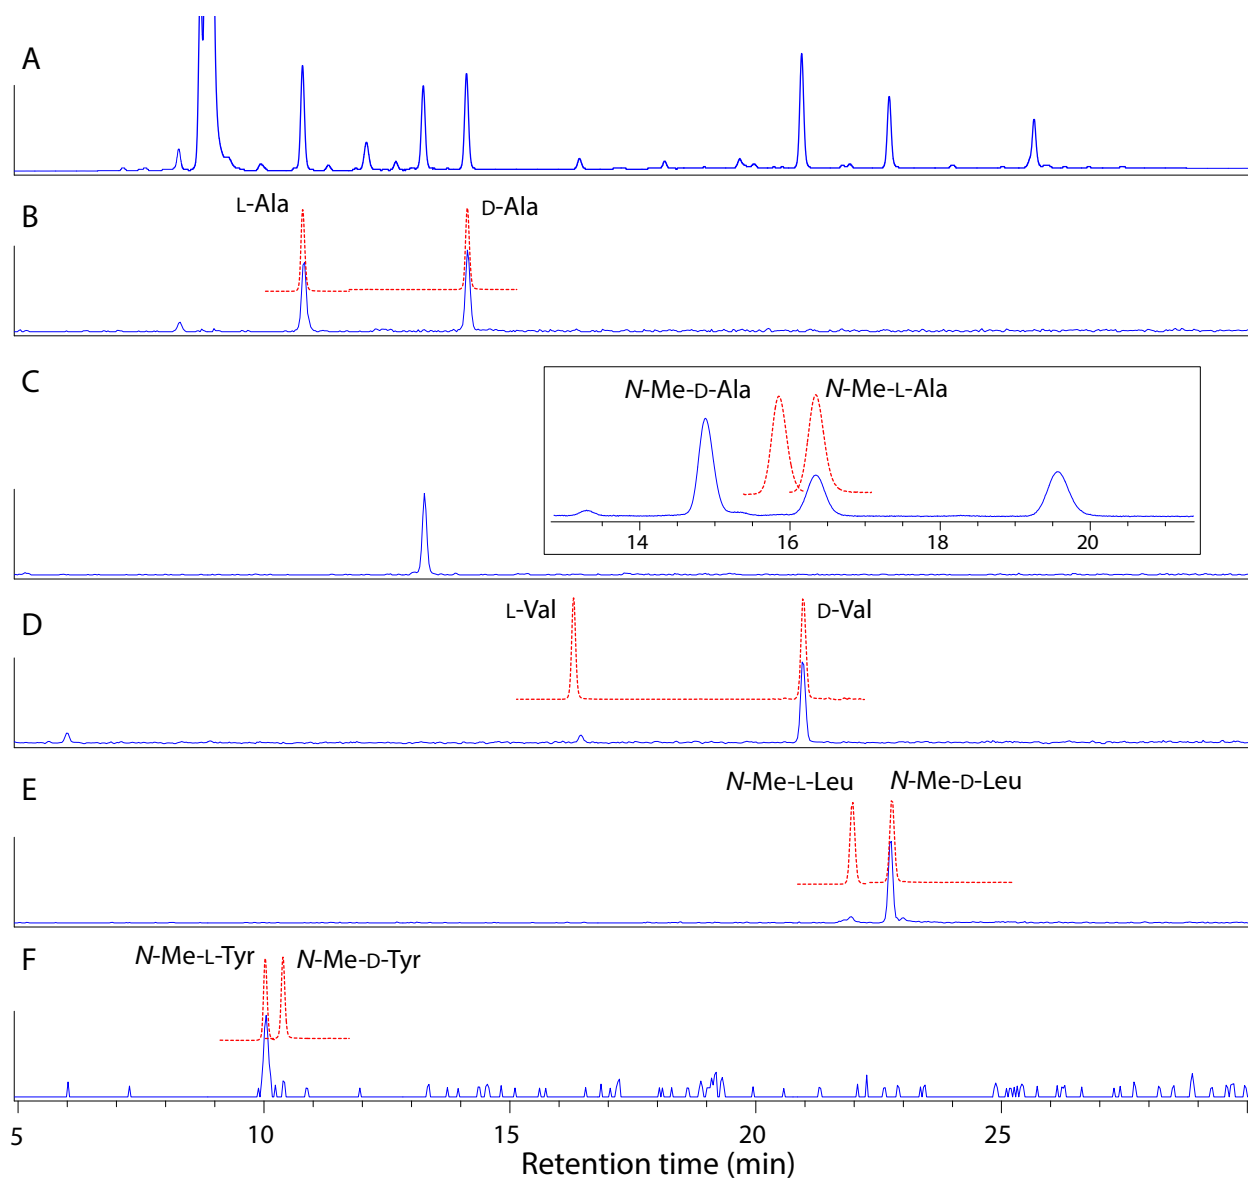

**Figure S36.** Marfeys analysis of talarolide C (**3**). (A) HPLC-DAD (340 nm) chromatogram showing L-FDAA amino acid derivatives of the acid hydrolysate **3**. (B-F) HPLC-MS(+)-SIE (single ion extraction) chromatograms for L-FDAA derivatives of authentic amino acid standards (red traces) and the acid hydrolysate of **3** (blue traces). The inset in (C) showed the UPLC-DAD (340 nm) chromatogram. Traces confirm that **3** incorporates (B) L-Ala and D-Ala (SIE  $m/z$  342), (C) *N*-Me-L-Ala (SIE  $m/z$  356), (D) D-Val (SIE  $m/z$  370), (E) *N*-Me-D-Leu (SIE  $m/z$  398), and (F) *N*-Me-L-Tyr (SIE  $m/z$  448).

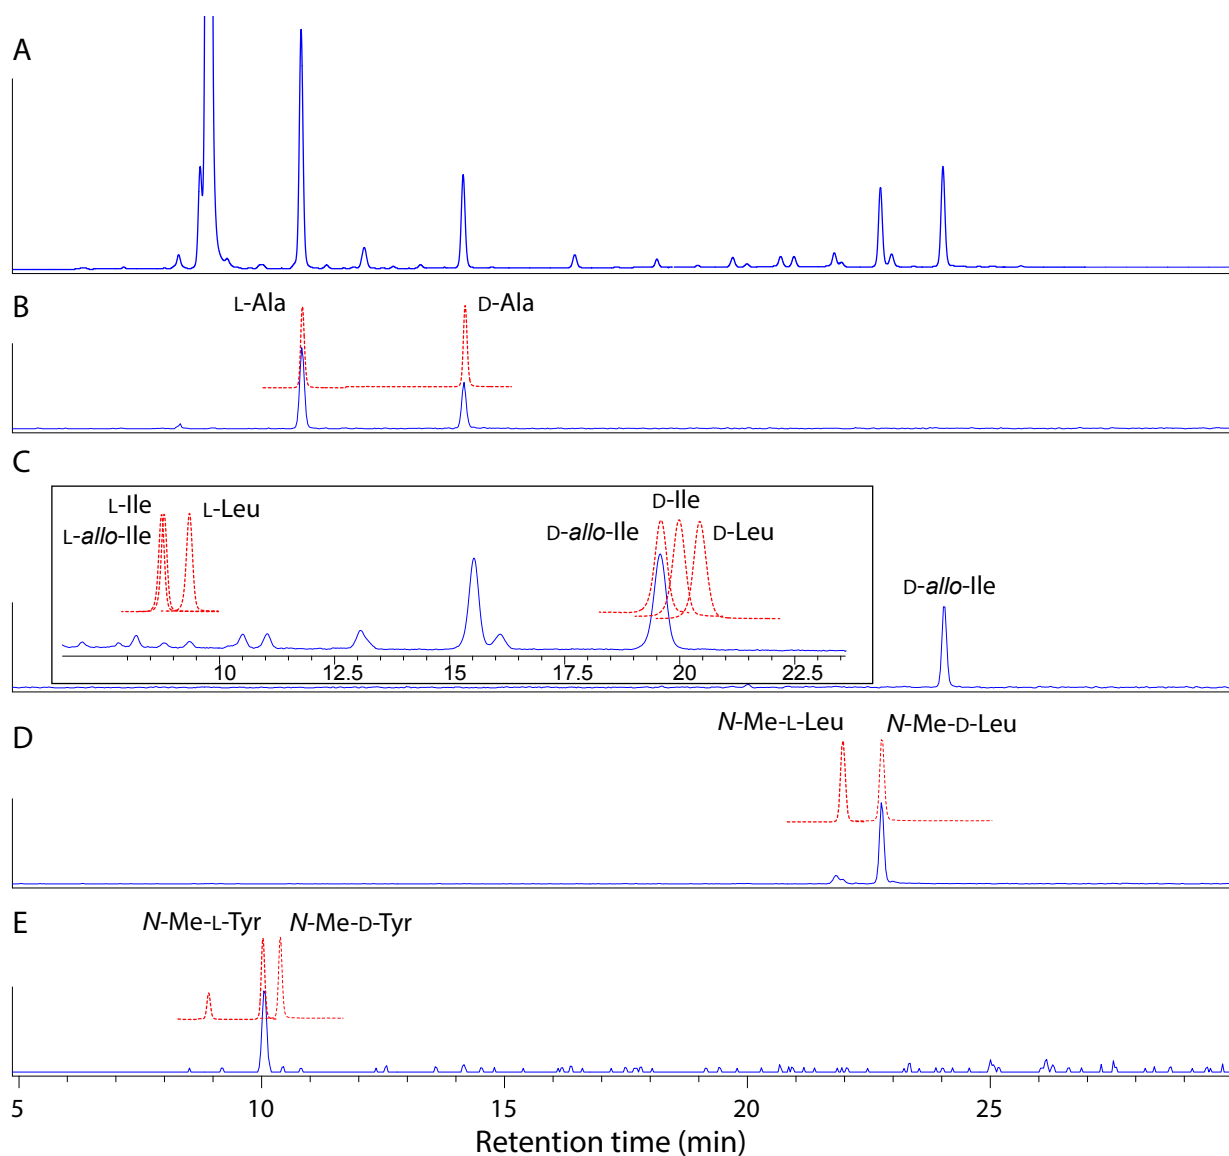

**Figure S37.** Marfeys analysis of talarolide D (**4**). (A) HPLC-DAD (340 nm) chromatogram showing L-FDAA amino acid derivatives of the acid hydrolysate **4**. (B-F) HPLC-MS(+)-SIE (single ion extraction) chromatograms for L-FDAA derivatives of authentic amino acid standards (red traces) and the acid hydrolysate of **4** (blue traces). The insets in (C) showed the UPLC-DAD (340 nm) chromatogram. Traces confirm that **4** incorporates (B) L-Ala and D-Ala (SIE  $m/z$  342), (C) D-allo-Ile (SIE  $m/z$  384), (D) *N*-Me-D-Leu (SIE  $m/z$  398), and (E) *N*-Me-L-Tyr (SIE  $m/z$  448).

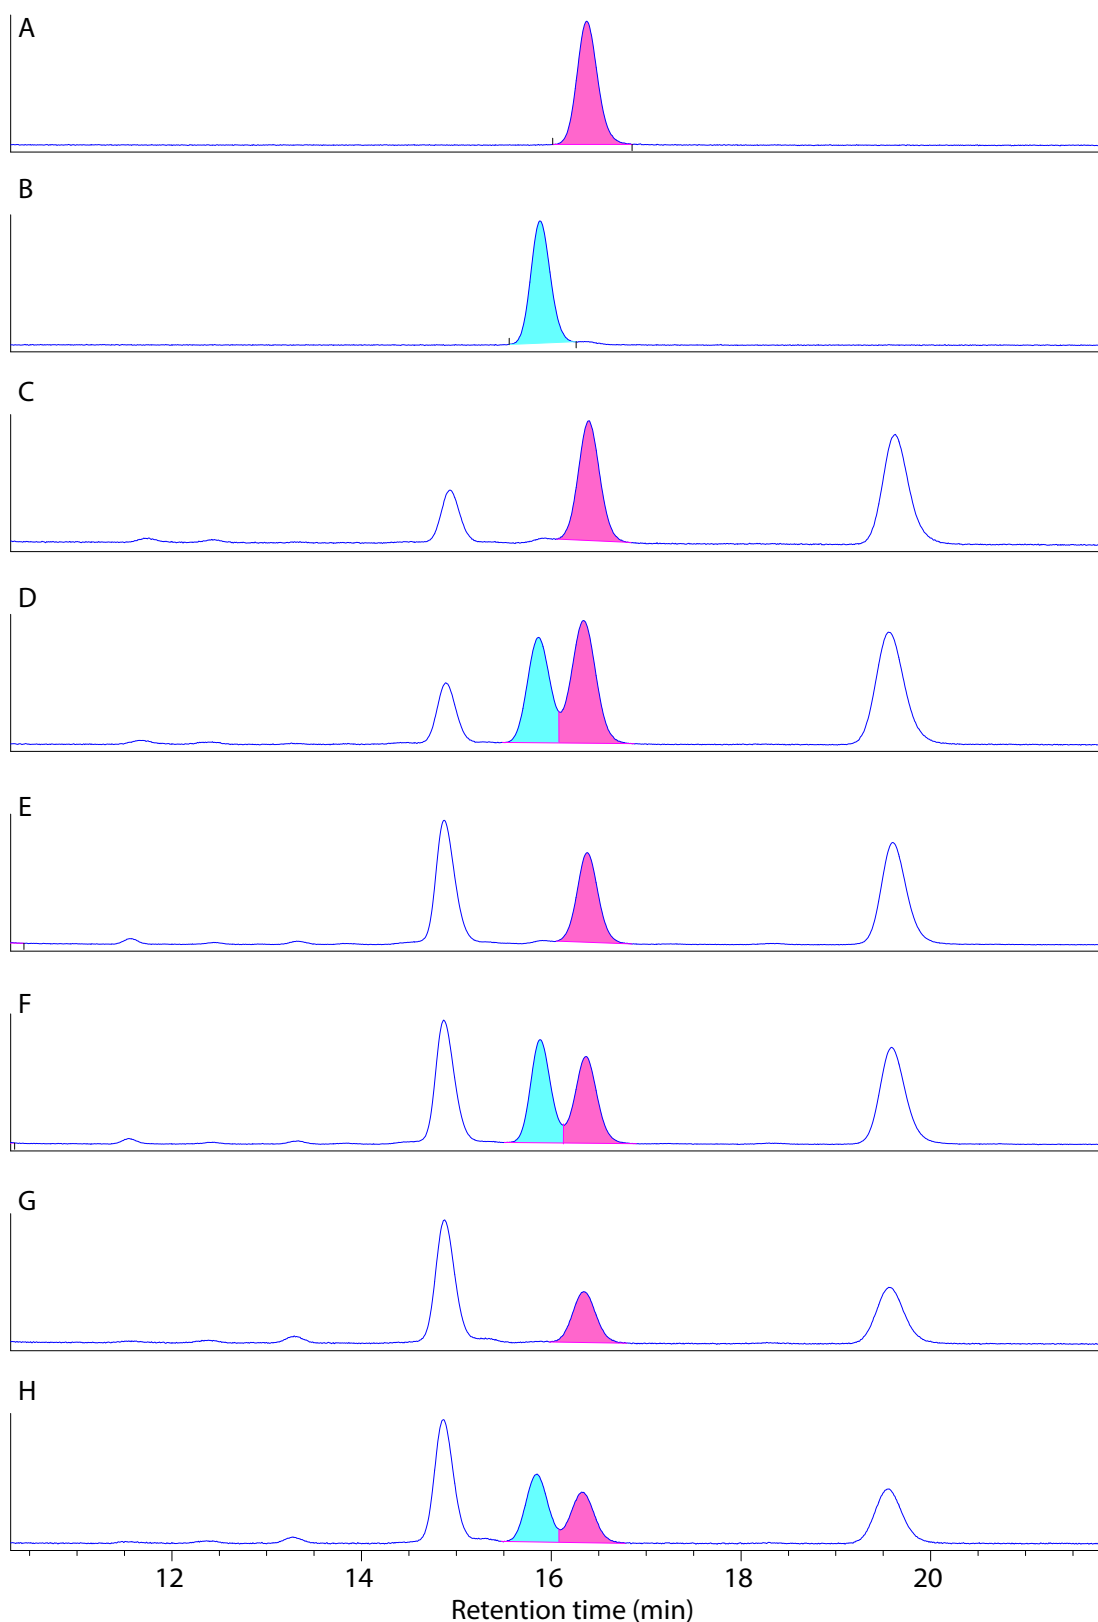

**Figure S38.** UPLC-DAD (340 nm) chromatograms showing (A) synthetic L-FDAA-*N*-Me-L-Ala; (B) synthetic L-FDAA-*N*-Me-D-Ala; (C) acid hydrolysate of **1**, (D) acid hydrolysate of **1** co-injected with synthetic L-FDAA-*N*-Me-D-Ala; (E) acid hydrolysate of **2**; (F) acid hydrolysate of **2** co-injected with synthetic L-FDAA-*N*-Me-D-Ala; (G) acid hydrolysate of **3**; (H) acid hydrolysate of **3** co-injected with synthetic L-FDAA-*N*-Me-D-Ala, confirming the presence of *N*-Me-L-Ala in **1-3**.

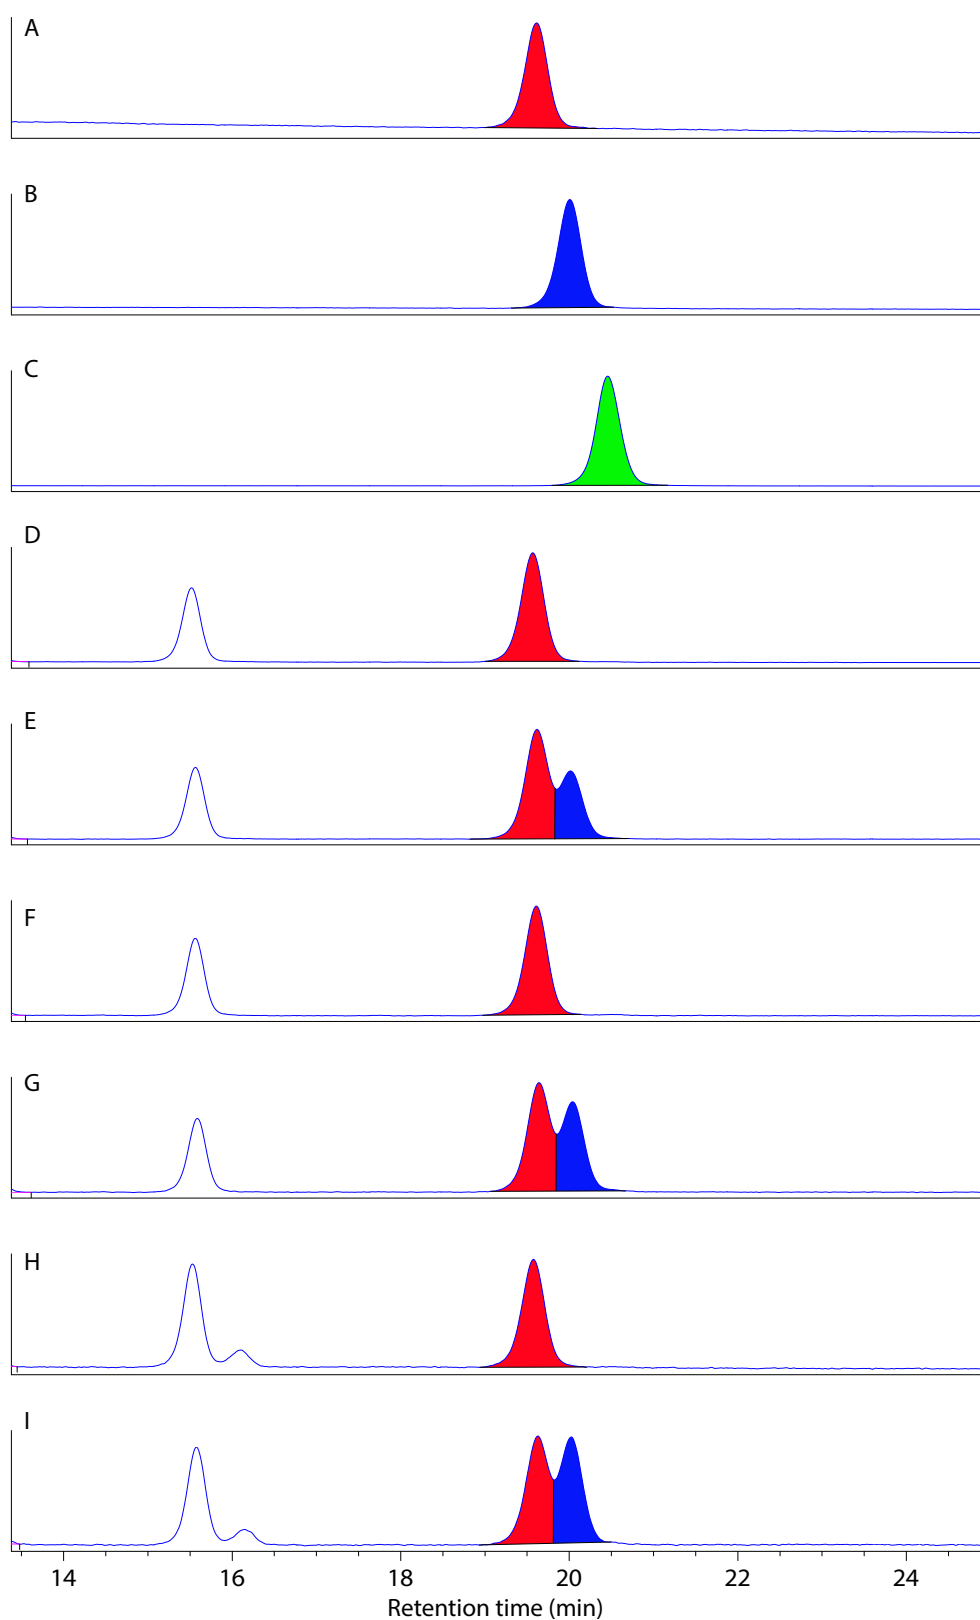

**Figure S39.** UPLC-DAD (340 nm) chromatograms showing: (A) synthetic L-FDAA-D-*allo*-Ile; (B) synthetic L-FDAA-D-Ile; (C) synthetic L-FDAA-D-Leu; (D) acid hydrolysate of **1**; (E) acid hydrolysate of **1** co-injected with L-FDAA-D-Ile; (F) acid hydrolysate of **2**; (G) acid hydrolysate of **2** co-injected with L-FDAA-D-Ile; (H) acid hydrolysate of **4**; (I) acid hydrolysate of **4** co-injected with L-FDAA-D-Ile; confirming the presence of D-*allo*-Ile in **1**, **2** and **4**.

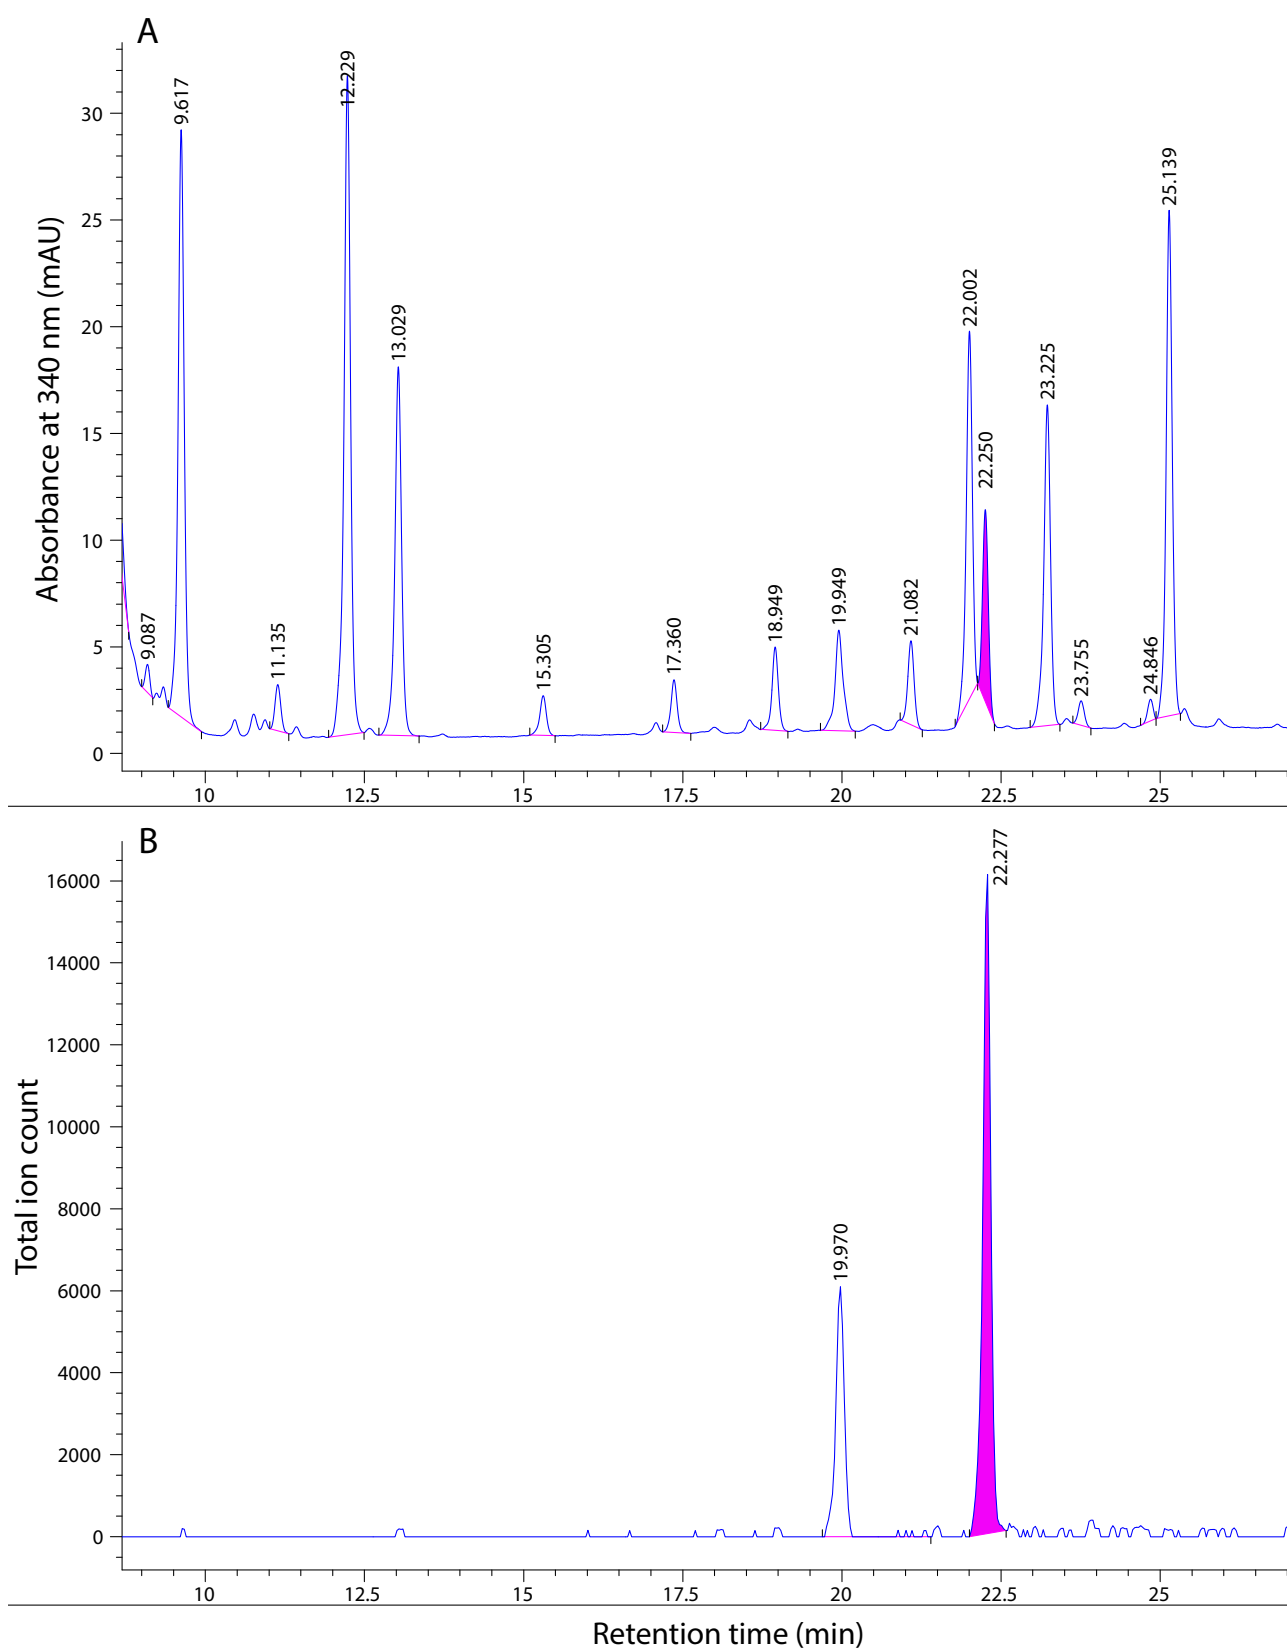

**Figure 40.** (A) HPLC-DAD (340 nm) chromatogram showing L-FDAA derivatives of partial hydrolysate of **2** and (B) HPLC-MS(+)-SIE (single ion extraction) chromatogram for L-FDAA-D-*allo*-Ile-Ala ( $m/z$  455) (peak shaded in magenta).

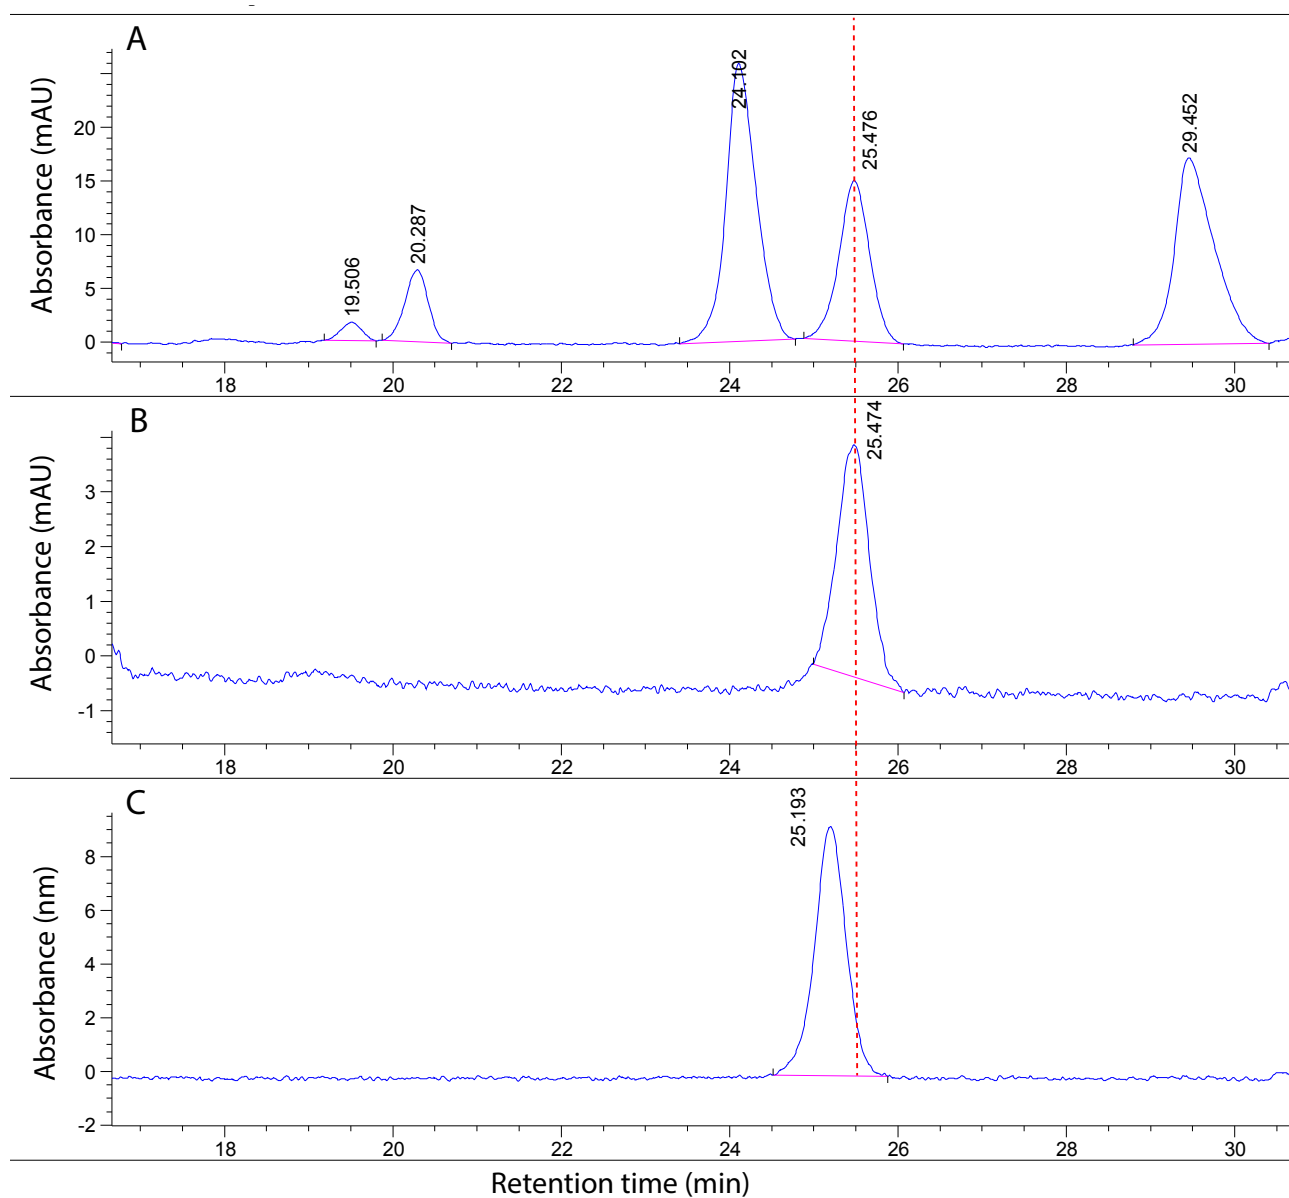

**Figure S41.** (A) HPLC-DAD (340 nm) chromatogram showing (A) L-FDAA derivatives of partial hydrolysate of **2**, and authentic standards of (B) L-FDAA-D-*allo*-Ile-D-Ala and (C) L-FDAA-D-*allo*-Ile-L-Ala

#### 4. MSMS analysis of talarolides

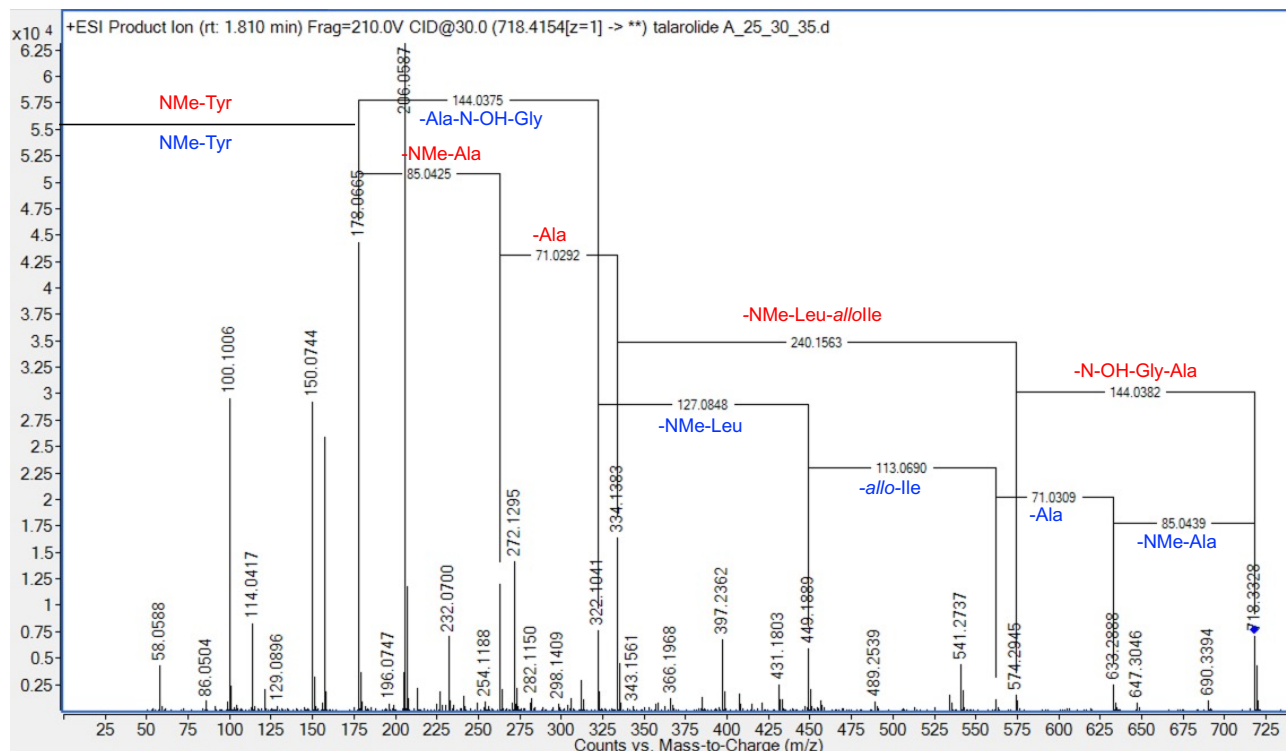

**Figure S42.** UPLC-QTOF-MS/MS spectrum of talarolide A (**1**) at 30 V collision energy with two different diagnostic fragmentations (in red and blue)

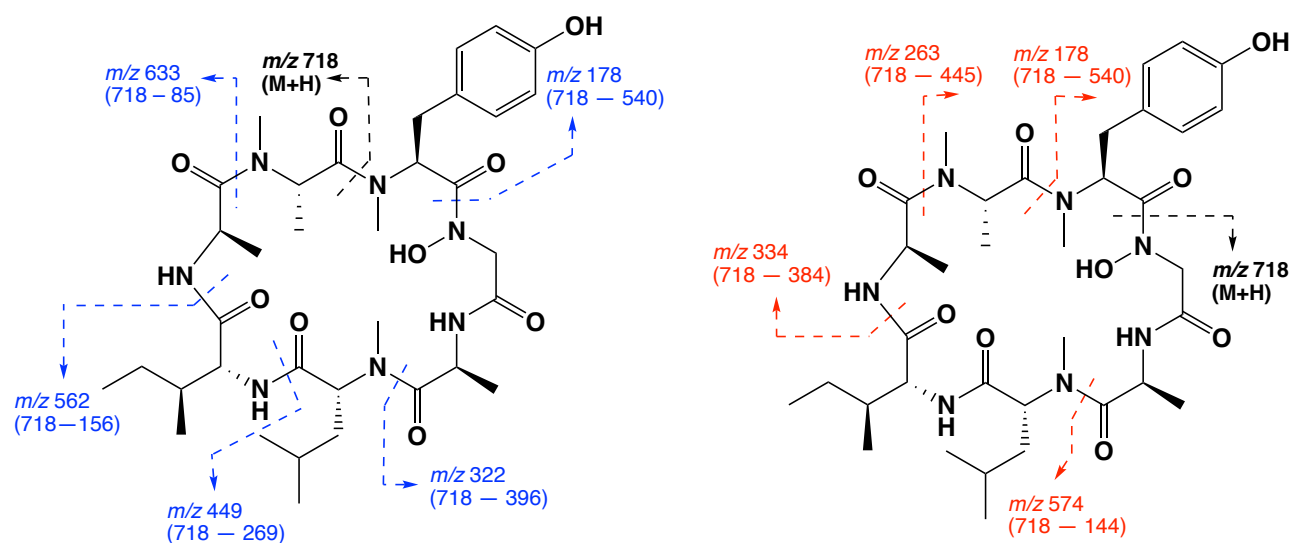



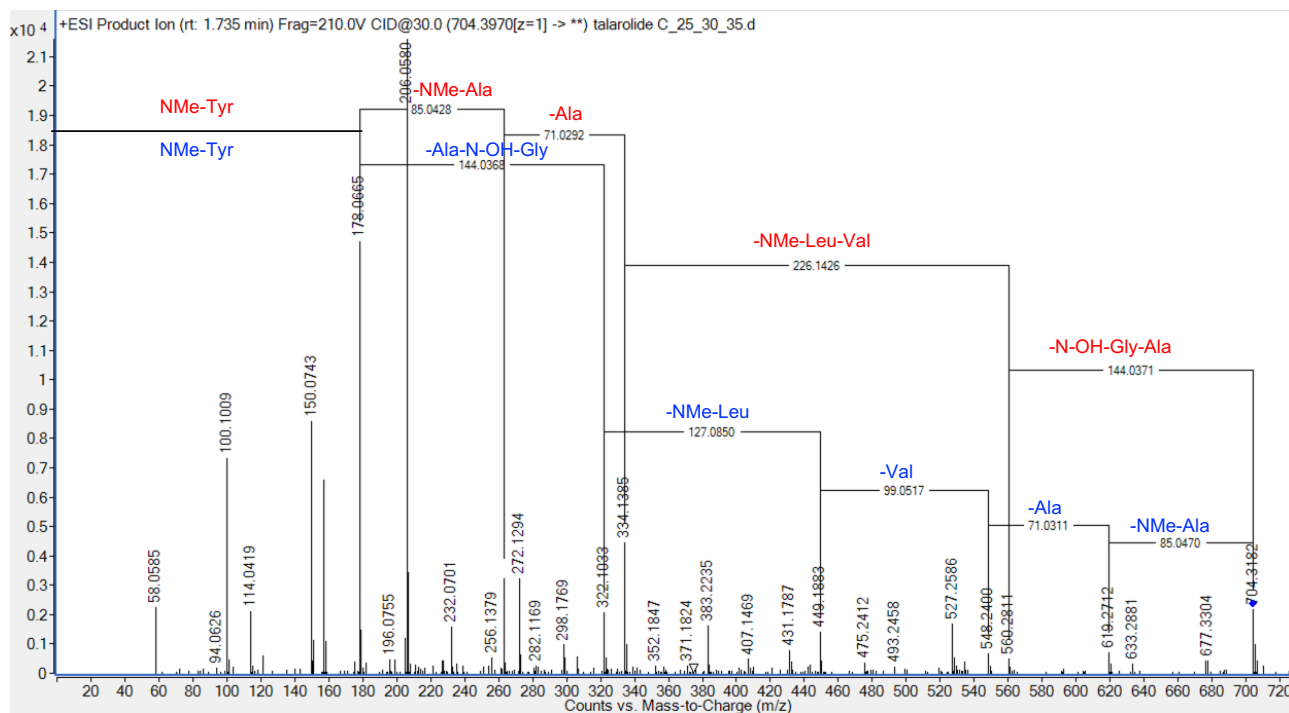

**Figure S44.** UPLC-QTOF-MS/MS spectrum of talarolide C (**3**) at 30 V collision energy with two different diagnostic fragmentations (in red and blue)

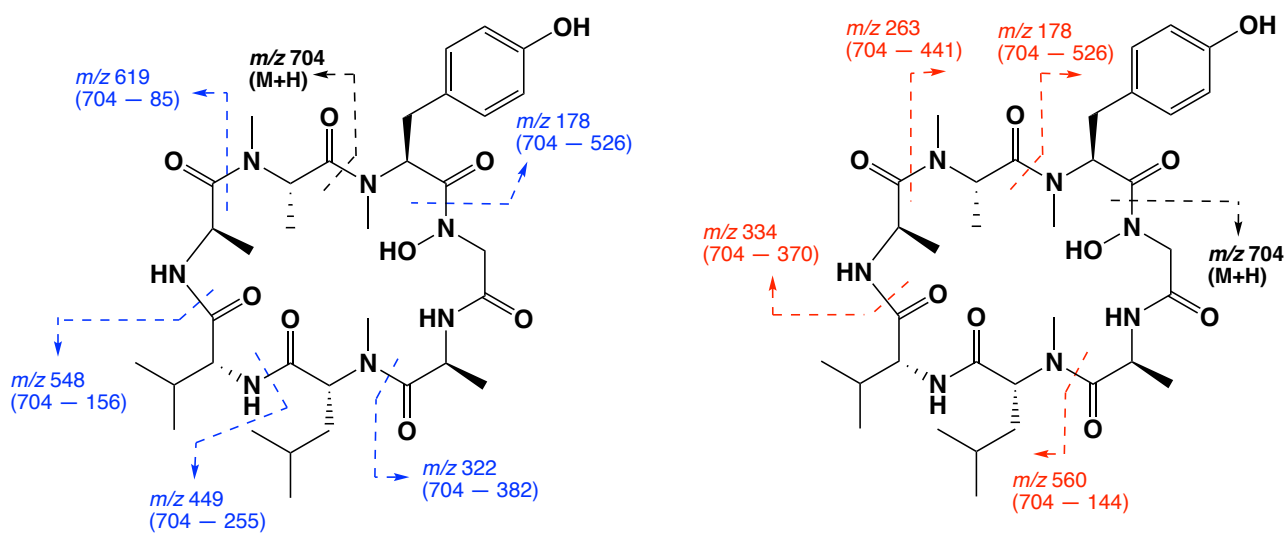

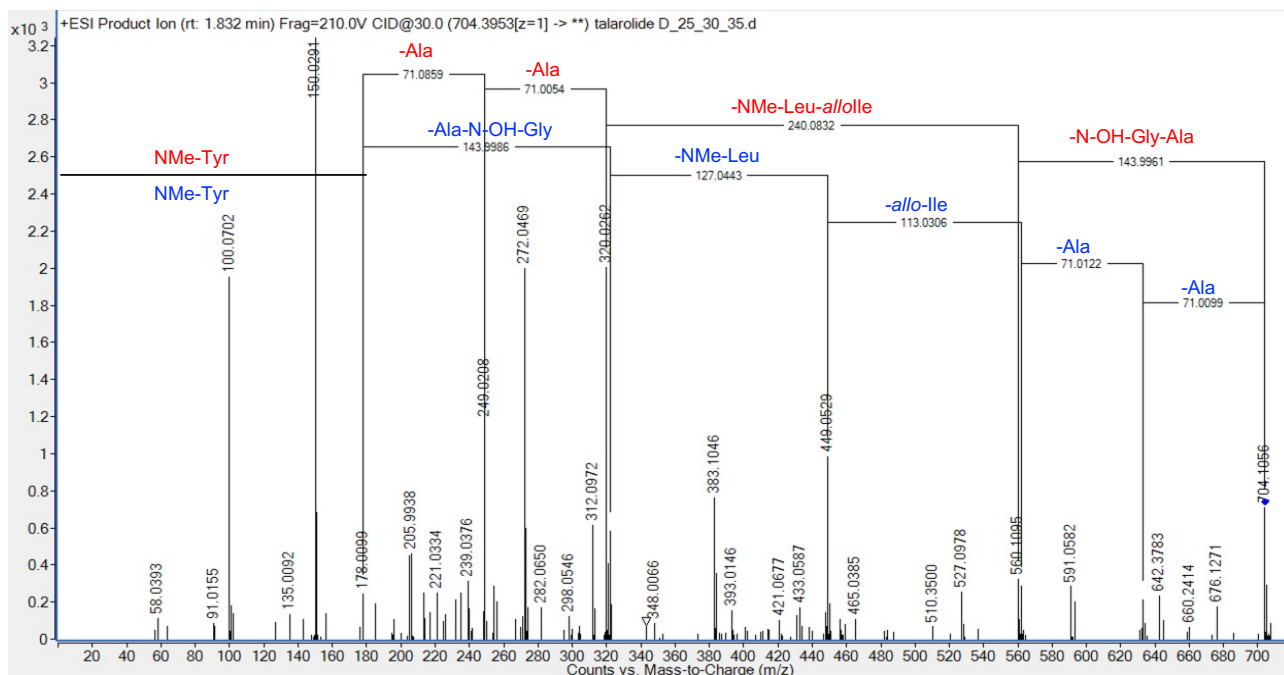

**Figure S45.** UPLC-QTOF-MS/MS spectrum of talarolide D (**4**) at 30 V collision energy with two different diagnostic fragmentations (in red and blue)

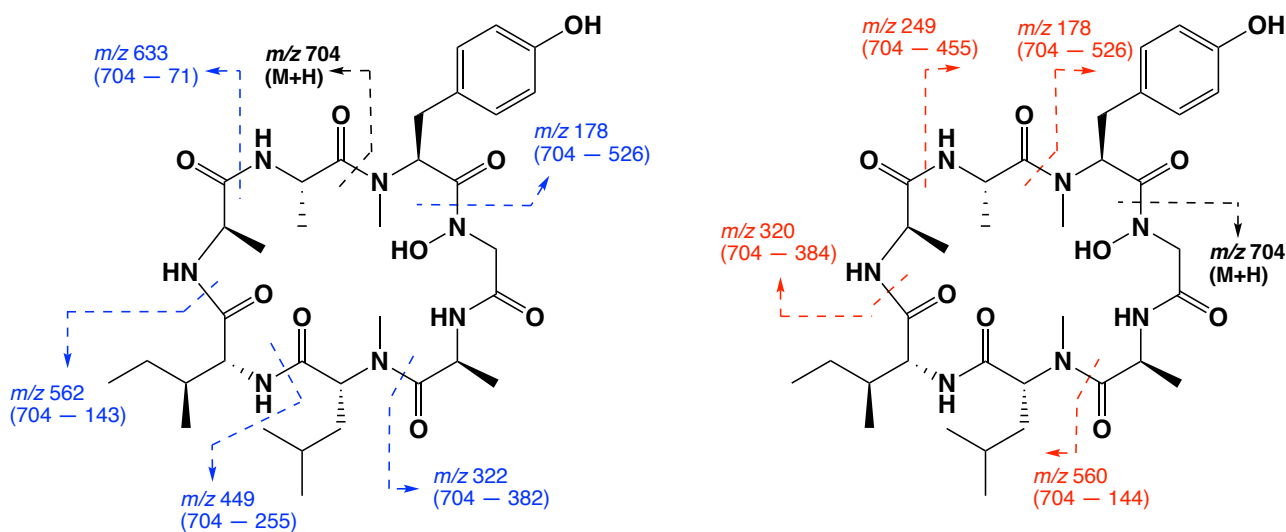

## 5. Synthetic dipeptides and synthetic talarolide B

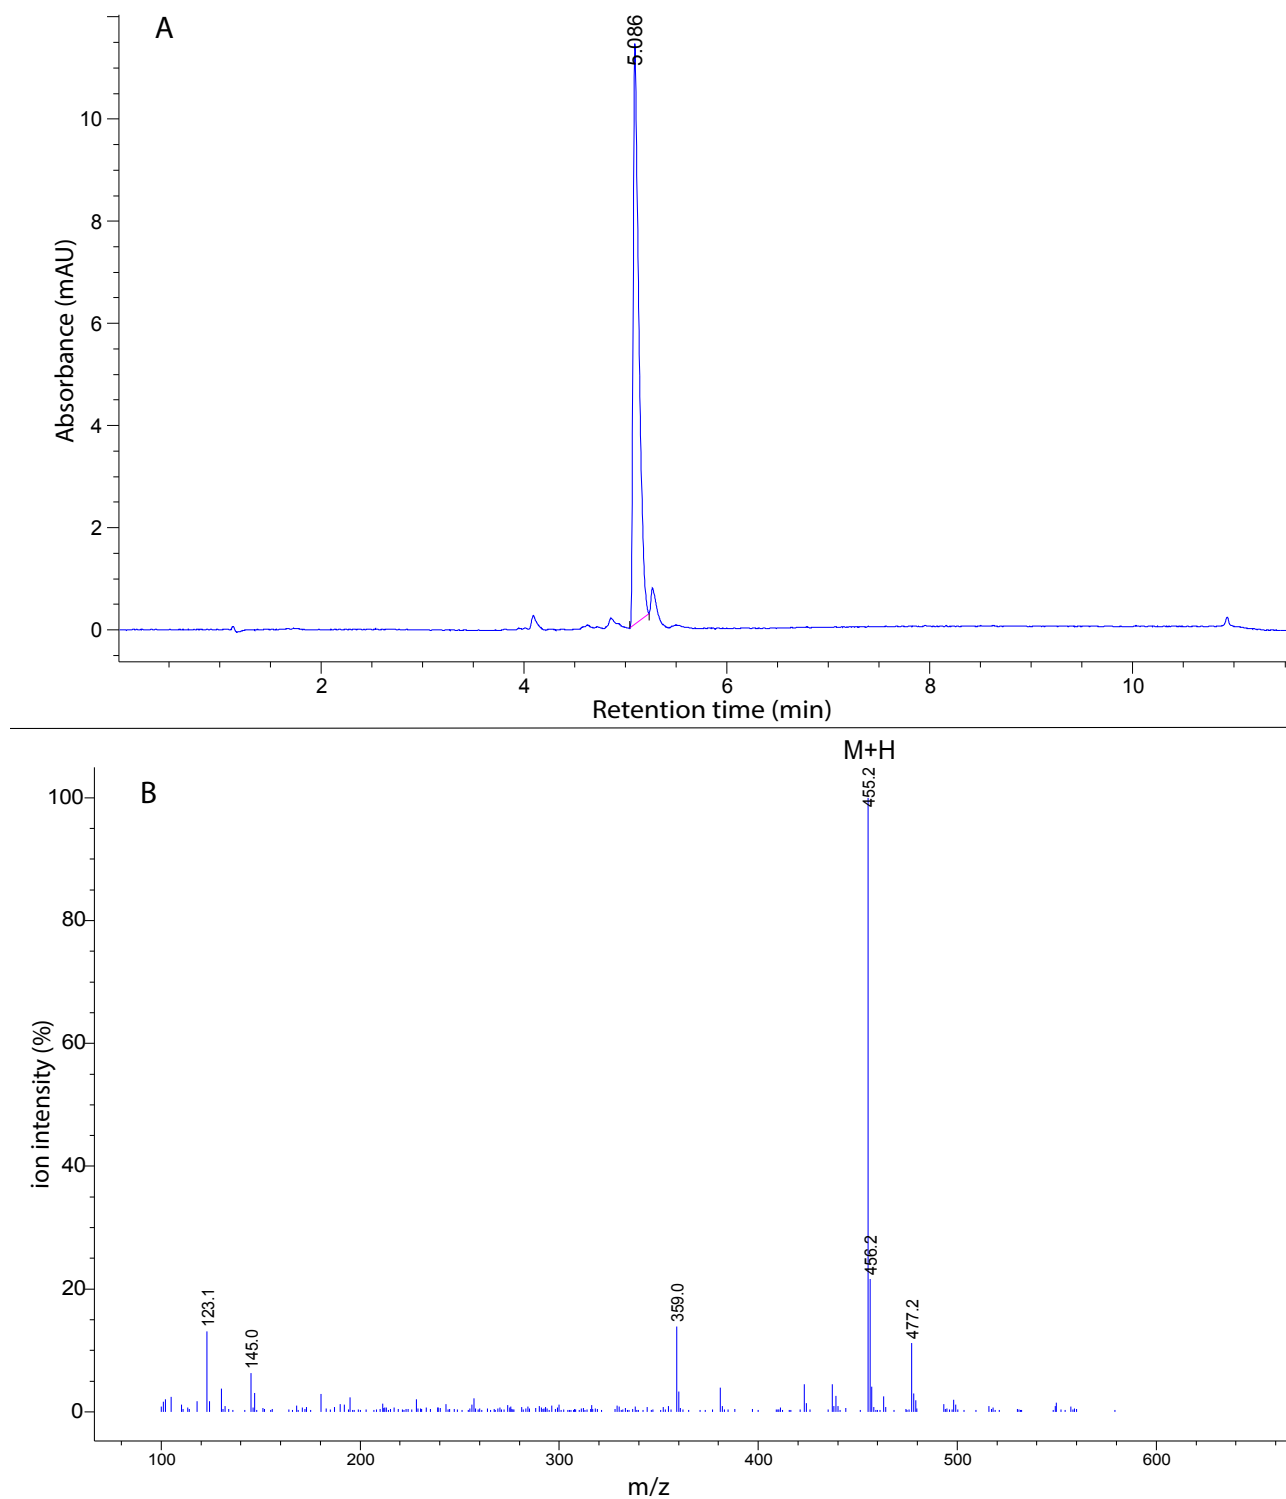

**Figure S46.** HPLC-DAD-MS of synthetic L-FDAA-D-*allo*-Ile-D-Ala; (A) HPLC-DAD (340 nm) chromatogram and (B) LRMS(+) spectrum of the peak at 5.086 min.

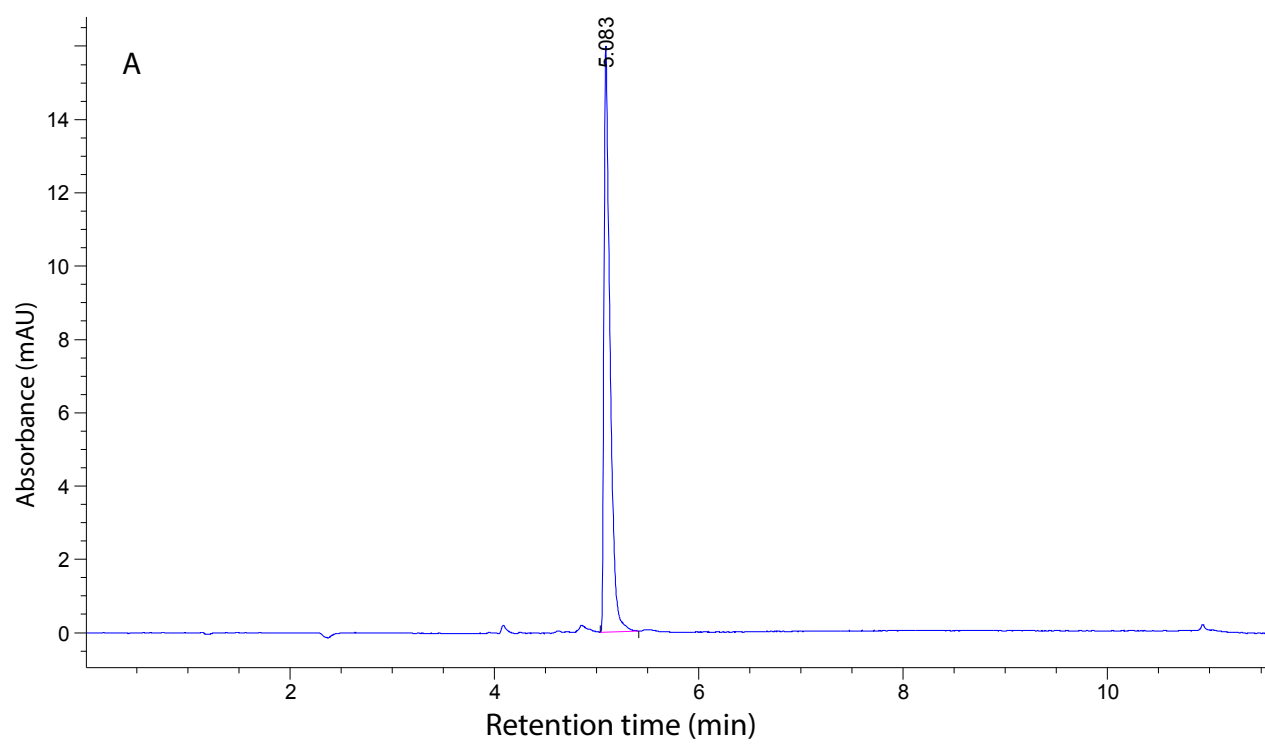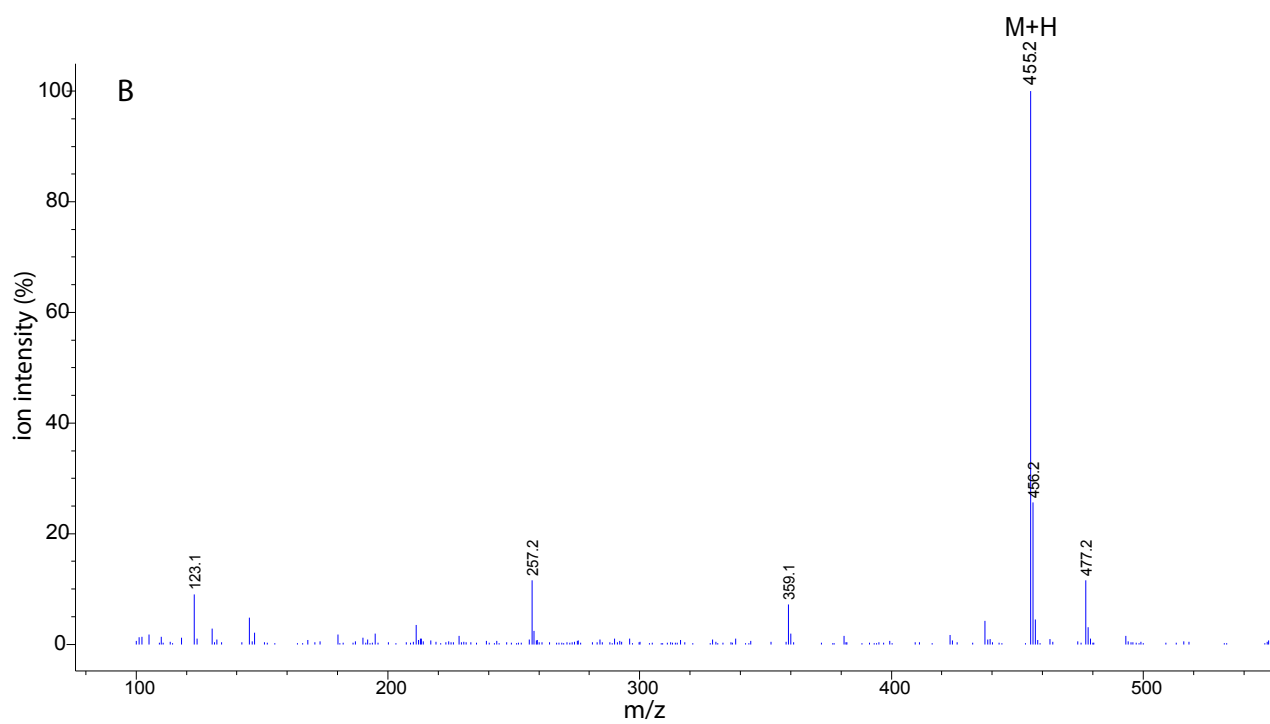

**Figure S47.** HPLC-DAD-MS of synthetic L-FDAA-D-*allo*-Ile-L-Ala; (A) HPLC-DAD (340 nm) chromatogram and (B) LRMS(+) spectrum of the peak at 5.083 min.

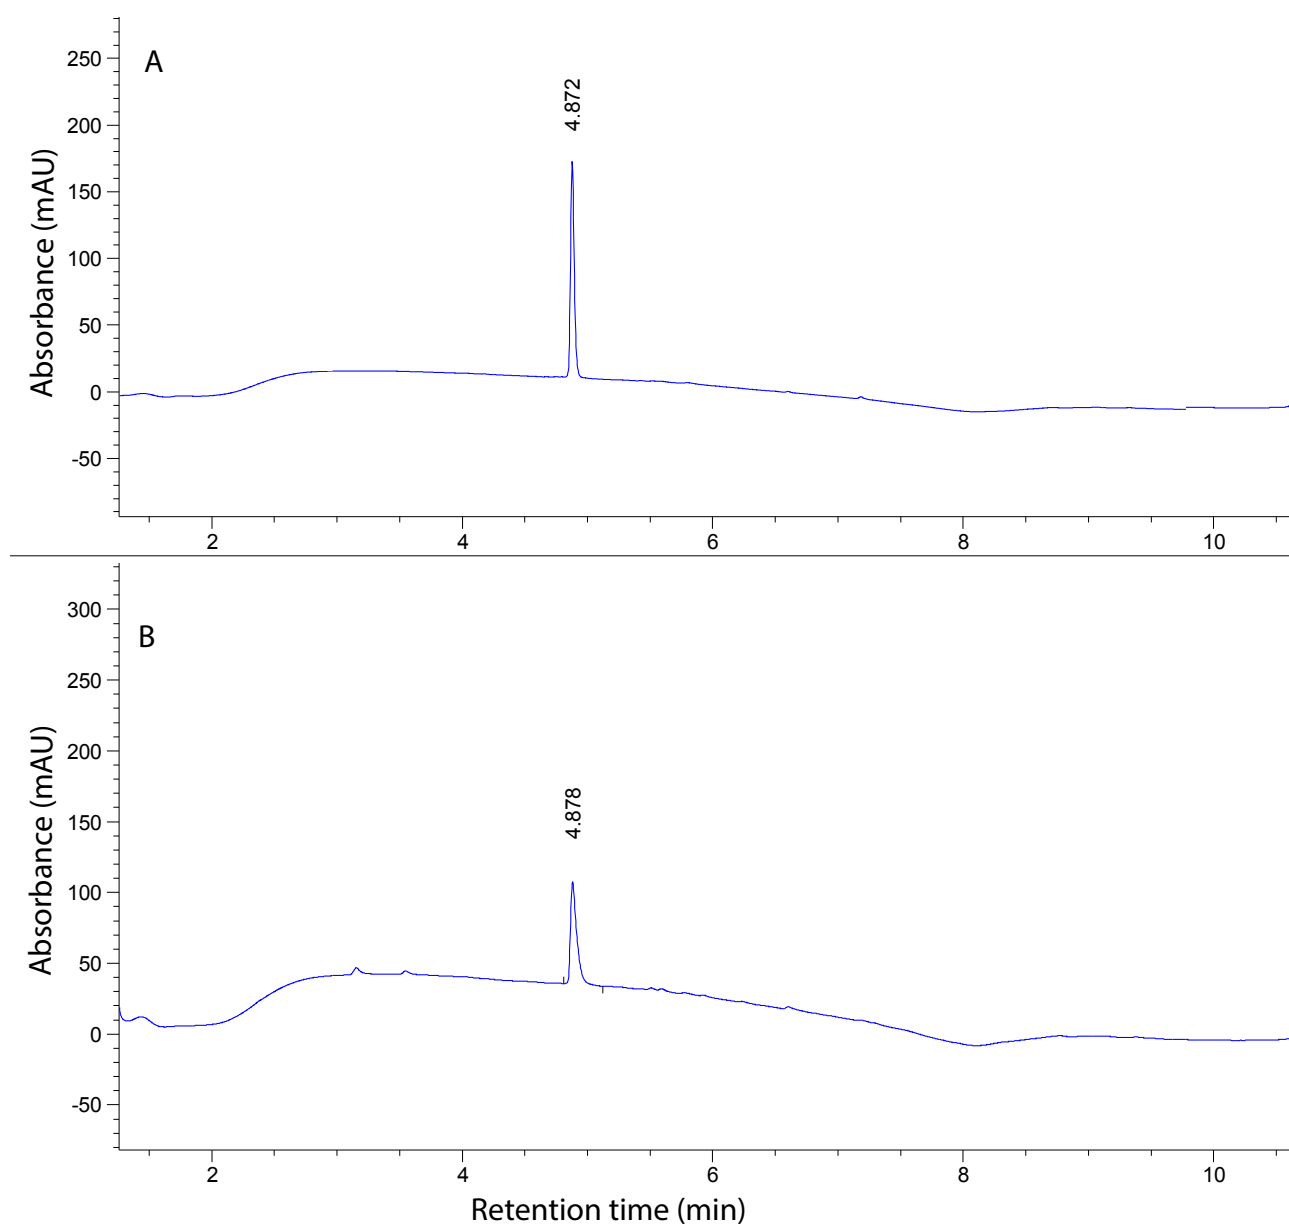

**Figure S48.** HPLC-DAD (210 nm) chromatograms of (A) synthetic **2** and (B) natural product **2**

## Mass Spectrum Molecular Formula Report

### Analysis Info

Analysis Name D:\Data\Waleed\Talarolide-B 000001.d  
Method tune-med\_AP.m  
Sample Name Talarolide-B  
Comment

Acquisition Date 6/6/2023 11:07:44 AM

Operator a.salim  
Instrument / Ser# micrOTOF 213750.00  
232

### Acquisition Parameter

|             |            |                      |          |                  |           |
|-------------|------------|----------------------|----------|------------------|-----------|
| Source Type | ESI        | Ion Polarity         | Positive | Set Nebulizer    | 0.8 Bar   |
| Focus       | Not active |                      |          | Set Dry Heater   | 180 °C    |
| Scan Begin  | 100 m/z    | Set Capillary        | 4500 V   | Set Dry Gas      | 5.0 l/min |
| Scan End    | 1000 m/z   | Set End Plate Offset | -500 V   | Set Divert Valve | Source    |

### Generate Molecular Formula Parameter

|                  |                        |         |
|------------------|------------------------|---------|
| Formula, min.    |                        |         |
| Formula, max.    |                        |         |
| Measured m/z     | Tolerance              | Charge  |
| Check Valence    | Minimum                | Maximum |
| Nitrogen Rule    | Electron Configuration |         |
| Filter H/C Ratio | Minimum                | Maximum |
| Estimate Carbon  |                        |         |

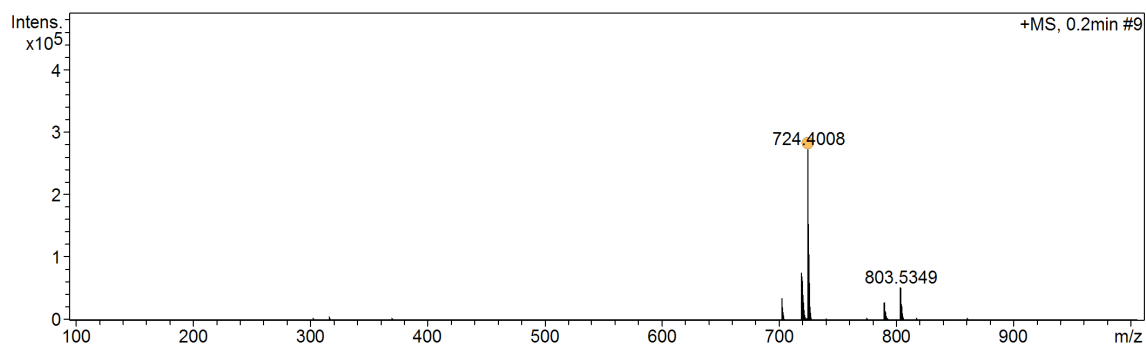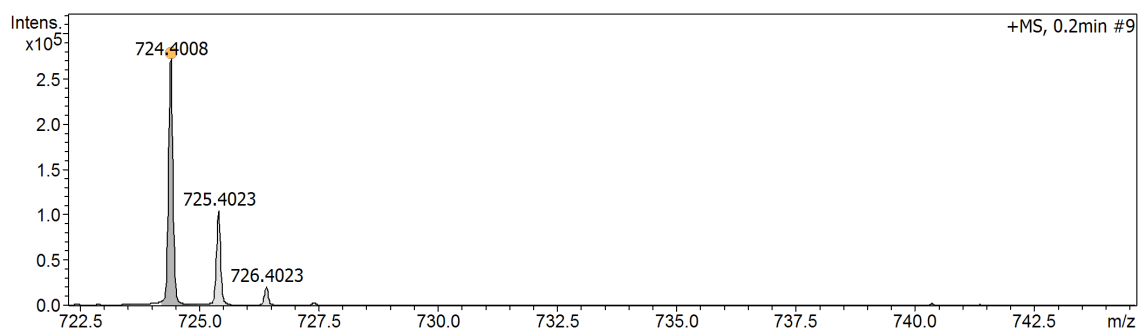

| Meas. m/z | # | Ion Formula  | m/z      | err [ppm] | mSigma | # Sigma | Score  | rdb  | e <sup>-</sup> Conf | N-Rule |
|-----------|---|--------------|----------|-----------|--------|---------|--------|------|---------------------|--------|
| 724.4008  | 1 | C35H55N7NaO8 | 724.4004 | -0.4      | 17.3   | 1       | 100.00 | 11.5 | even                | ok     |

Figure S49. HRMS data for synthetic talarolide B (2)

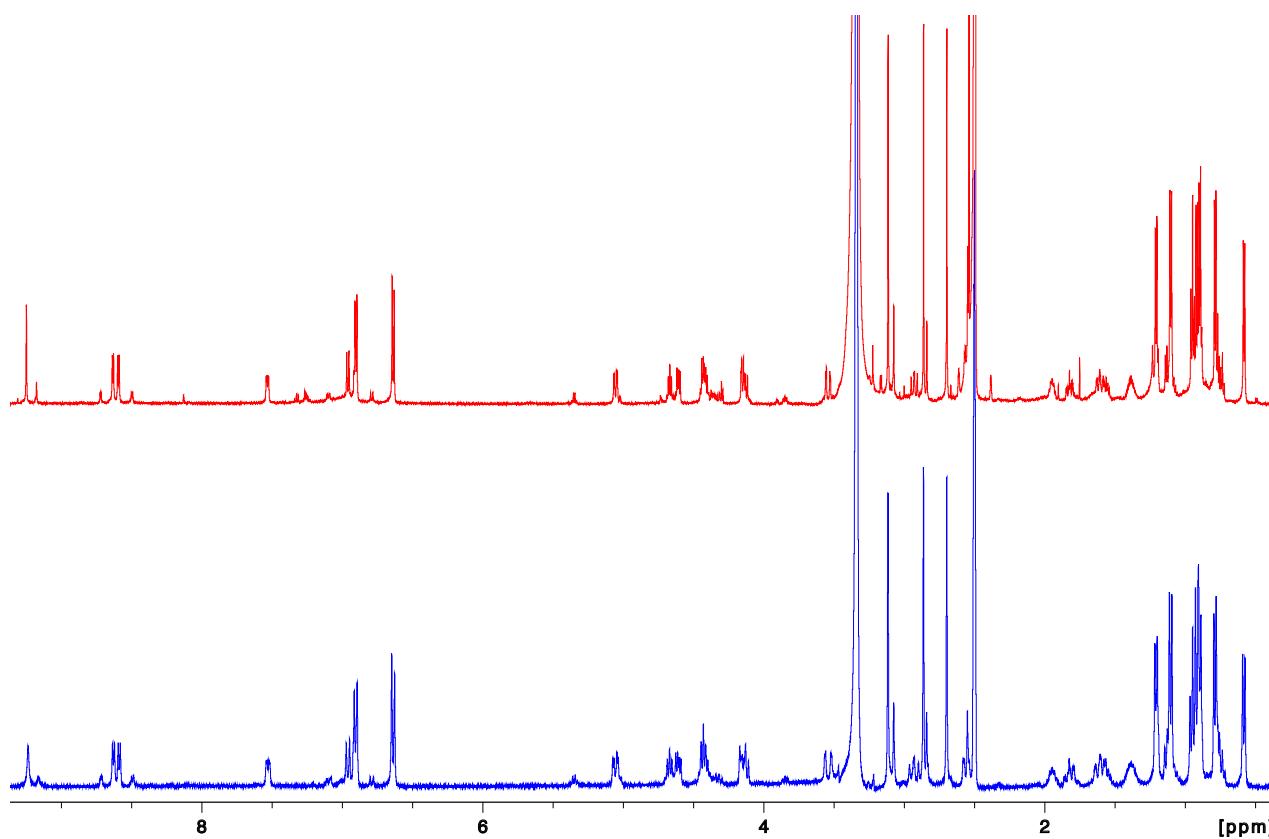

**Figure S50.**  $^1\text{H}$  NMR(600 MHz,  $\text{DMSO}-d_6$ ) spectra of synthetic (red) and natural (blue) talarolide B (2)

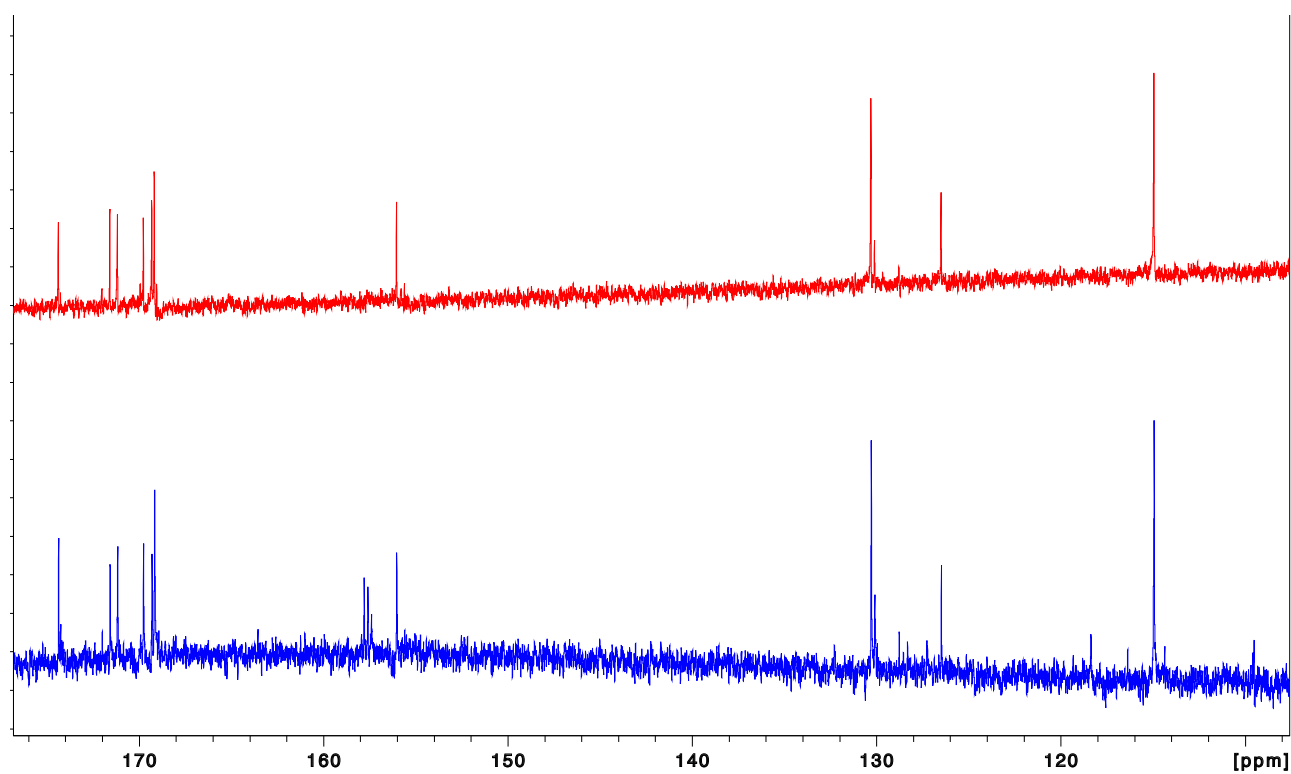

**Figure S51.**  $^{13}\text{C}$  NMR(150 MHz,  $\text{DMSO}-d_6$ ) spectra of synthetic (red) and natural (blue) talarolide B (2)

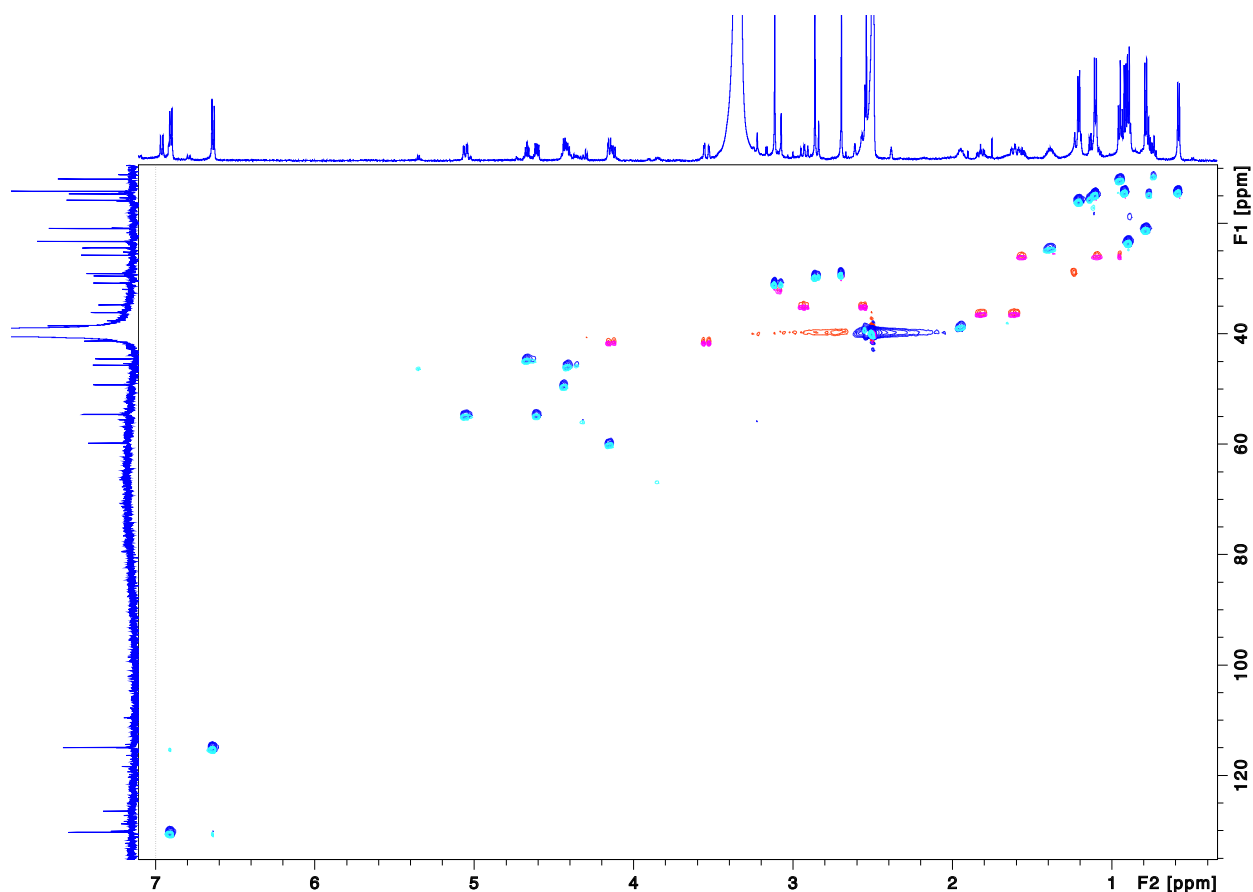

**Figure S52.** Overlay of HSQC (DMSO- $d_6$ ) spectra of synthetic (cyan and magenta peaks) and natural (blue and red peaks) talarolide B (**2**)

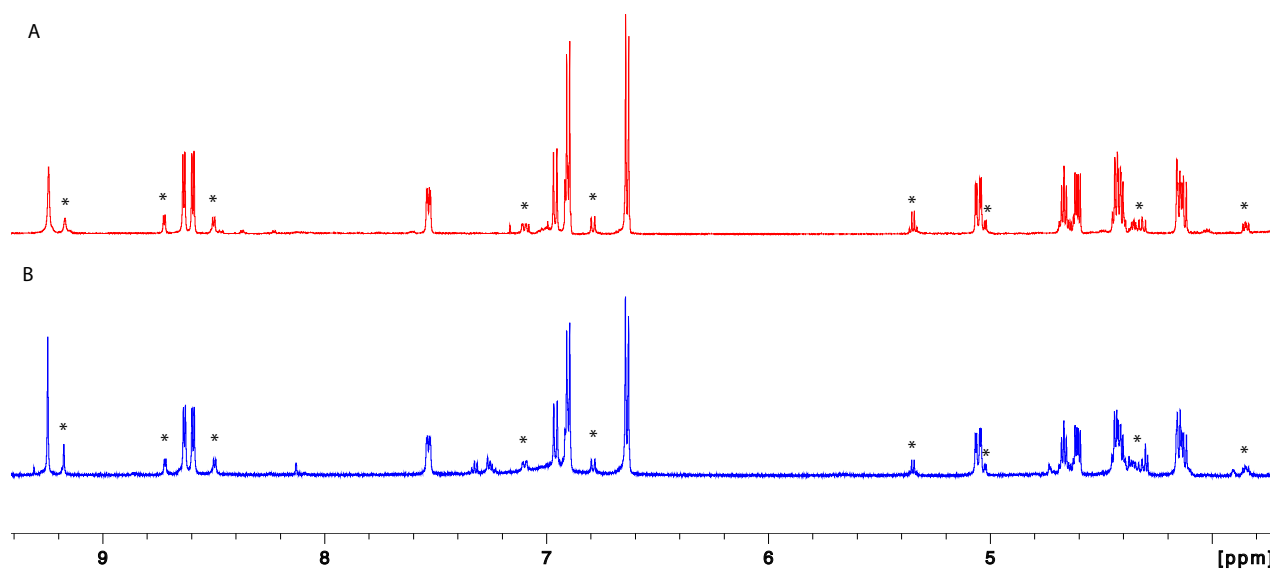

**Figure S53.**  $^1\text{H}$  NMR (DMSO- $d_6$ ) spectra of synthetic (red) and natural (blue) talarolide B (**2**) showing the signals of the minor conformers (marked with \*)

## 6. ROE and distance restraints for talarolide A in DMSO-*d*<sub>6</sub>

### (N-OH)Gly1

|                                                  |         |     |                     |
|--------------------------------------------------|---------|-----|---------------------|
| assi(resi 1 and name HA1 )(resi 1 and name HO )  | 0.0 0.0 | 5.0 | ! (6)w              |
| assi(resi 1 and name HA1 )(resi 2 and name HN )  | 0.0 0.0 | 3.5 | ! (10)M             |
| assi(resi 1 and name HA1 )(resi 1 and name HA2 ) | 0.0 0.0 | 2.7 | ! (16)S             |
| assi(resi 1 and name HA2 )(resi 2 and name HN )  | 0.0 0.0 | 5.0 | ! (7)W              |
| assi(resi 1 and name HO )(resi 6 and name HI* )  | 0.0 0.0 | 6.0 | ! (6)w + correction |
| assi(resi 1 and name HO )(resi 4 and name HN )   | 0.0 0.0 | 6.0 | ! (1)Vw             |
| assi(resi 1 and name HO )(resi 4 and name HG1* ) | 0.0 0.0 | 6.0 | ! (5)w              |

### Ala2

|                                                 |         |     |                 |
|-------------------------------------------------|---------|-----|-----------------|
| assi(resi 2 and name HA )(resi 2 and name HN )  | 0.0 0.0 | 3.5 | ! (8)M          |
| assi(resi 2 and name HA )(resi 3 and name HI* ) | 0.0 0.0 | 5.0 | ! (10)M + 1.5 A |
| correction                                      |         |     |                 |
| assi(resi 2 and name HA )(resi 2 and name HB* ) | 0.0 0.0 | 4.2 | ! (13)S + 1.5 A |
| correction                                      |         |     |                 |
| assi(resi 2 and name HA )(resi 4 and name HN )  | 0.0 0.0 | 6.0 | ! (2)vW         |

### Leu3(N-CH3)

|                                                   |         |     |         |
|---------------------------------------------------|---------|-----|---------|
| assi(resi 3 and name HA )(resi 4 and name HN )    | 0.0 0.0 | 5.0 | ! (7)w  |
| assi(resi 3 and name HA )(resi 3 and name HB2 )   | 0.0 0.0 | 3.5 | ! (10)M |
| assi(resi 3 and name HA )(resi 3 and name HG )    | 0.0 0.0 | 5.0 | ! (6)w  |
| assi(resi 3 and name HA )(resi 3 and name HD1 )   | 0.0 0.0 | 3.5 | ! (11)M |
| assi(resi 3 and name HA )(resi 3 and name HD2 )   | 0.0 0.0 | 5.0 | ! (7)W  |
| assi(resi 3 and name HI* )(resi 4 and name HG1* ) | 0.0 0.0 | 6.0 | ! (9)M  |
| assi(resi 3 and name HI* )(resi 2 and name HB* )  | 0.0 0.0 | 6.0 | ! (6)W  |

### allo-Ile4

|                                                 |         |     |                       |
|-------------------------------------------------|---------|-----|-----------------------|
| assi(resi 4 and name HA )(resi 4 and name HN )  | 0.0 0.0 | 6.0 | ! (8) M               |
| assi(resi 4 and name HA )(resi 5 and name HN )  | 0.0 0.0 | 3.5 | ! (11) M              |
| assi(resi 4 and name HA )(resi 4 and name HG* ) | 0.0 0.0 | 6.0 | ! (11) M + correction |
| assi(resi 4 and name HN )(resi 3 and name HB* ) | 0.0 0.0 | 6.0 | ! (3) VW              |

### Ala5

|                                                  |         |     |         |
|--------------------------------------------------|---------|-----|---------|
| assi(resi 5 and name HA )(resi 1 and name HO )   | 0.0 0.0 | 5.5 | ! (6)W  |
| assi(resi 5 and name HA )(resi 6 and name HI* )  | 0.0 0.0 | 4.2 | ! (12)S |
| assi(resi 5 and name HA )(resi 5 and name HB* )  | 0.0 0.0 | 4.2 | ! (12)S |
| assi(resi 5 and name HN )(resi 4 and name HB )   | 0.0 0.0 | 4.0 | ! (10)M |
| assi(resi 5 and name HN )(resi 4 and name HG1* ) | 0.0 0.0 | 6.0 | ! (2)VW |

### Ala6(N-CH3)

|                                                  |         |     |                     |
|--------------------------------------------------|---------|-----|---------------------|
| assi(resi 6 and name HA )(resi 7 and name HD* )  | 0.0 0.0 | 4.5 | ! (9)M              |
| assi(resi 6 and name HA )(resi 6 and name HB* )  | 0.0 0.0 | 4.2 | ! (14)S + 1.5 A     |
| correction                                       |         |     |                     |
| assi(resi 6 and name HI* )(resi 6 and name HB* ) | 0.0 0.0 | 6.0 | ! (9)M + correction |
| assi(resi 6 and name HI* )(resi 5 and name HB* ) | 0.0 0.0 | 6.0 | ! (9)M + correction |
| assi(resi 6 and name HA )(resi 7 and name HE* )  | 0.0 0.0 | 6.0 | ! (4)W              |

### Tyr7(N-CH3)

|                                                |         |     |        |
|------------------------------------------------|---------|-----|--------|
| assi(resi 7 and name HA )(resi 1 and name HO ) | 0.0 0.0 | 3.5 | ! (8)M |
|------------------------------------------------|---------|-----|--------|

```

assi(resi 7 and name HA )(resi 7 and name HD* ) 0.0 0.0 4.5 ! (8)M
assi(resi 7 and name HA )(resi 4 and name HG1* ) 0.0 0.0 6.0 ! (8)M
assi(resi 7 and name HD* )(resi 4 and name HG1* ) 0.0 0.0 7.0 ! (7)W
assi(resi 7 and name HE* )(resi 6 and name HB* ) 0.0 0.0 6.0 ! (6)W
assi(resi 7 and name HD* )(resi 7 and name HB* ) 0.0 0.0 6.0 ! (9,10)W
assi(resi 7 and name HD* )(resi 7 and name HI* ) 0.0 0.0 6.0 ! (9)M
assi(resi 7 and name HA )(resi 7 and name HI* ) 0.0 0.0 6.0 ! (6)W
assi(resi 7 and name HA )(resi 6 and name HA ) 0.0 0.0 3.5 ! (14)S

```

### Hydrogen Bond restraints

```

assign (resid 5 and name O )(resid 1 and name HO ) 1.88 0.3 0.42
assign (resid 5 and name O )(resid 1 and name ON ) 2.88 0.3 0.3

```

### Dihedral Angle restraints

Ala2  $^3J = 5.3$  Hz

```

assign (resid 1 and name C ) (resid 2 and name N )
(resid 2 and name CA) (resid 2 and name C ) 1.0 -60.0 30.0 2

```

Ile4  $^3J = 9.6$  Hz

```

assign (resid 3 and name C ) (resid 4 and name N )
(resid 4 and name CA) (resid 4 and name C ) 1.0 -100.0 30.0 2

```

ala5  $^3J = 4.3$  Hz

```

assign (resid 4 and name C ) (resid 5 and name N )
(resid 5 and name CA) (resid 5 and name C ) 1.0 60.0 30.0 2

```
